# Supplementary material for: Protein Signatures and Individual Circulating Proteins, including IL-6 and IL-15, Associated with Prognosis in Patients with Biliary Tract Cancer
Source: Cancers (Basel). 2023 Feb 7;15(4):1062. doi: 10.3390/cancers15041062 (PMC9953893; doi:10.3390/cancers15041062)
Supplement: Supplementary file 1 [file cancers-15-01062-s001.zip › 20220204 Supplementary File S2 - suppl. tables - Prognostic proteins for BTC v1 - proofread.xlsx]

## Sheet: Table S1
Table S1: Full list of proteins in the Olink Target 96 Immuno-Oncology assay.
Abbreviated protein names	Protein names	UniProt ID
ADA	Adenosine deaminase (ADA)	P00813
ADGRG1	Adhesion G-protein coupled receptor G1 (ADGRG1)	Q9Y653
ANGPT1	Angiopoietin-1 (ANGPT1)	Q15389
ANGPT2	Angiopoietin-2 (ANGPT2)	O15123
ARG1	Arginase-1 (ARG1)	P05089
CAIX	Carbonic anhydrase 9 (CAIX)	Q16790
CASP-8	Caspase-8 (CASP-8)	Q14790
CCL17	C-C motif chemokine 17 (CCL17)	Q92583
CCL19	C-C motif chemokine 19 (CCL19)	Q99731
CCL20	C-C motif chemokine 20 (CCL20)	P78556
CCL23	C-C motif chemokine 23 (CCL23)	P55773
CCL3	C-C motif chemokine 3 (CCL3)	P10147
CCL4	C-C motif chemokine 4 (CCL4)	P13236
CD244	Natural killer cell receptor 2B4 (CD244)	Q9BZW8
CD27	CD27 antigen (CD27)	P26842
CD28	T-cell-specific surface glycoprotein CD28 (CD28)	P10747
CD4	T-cell surface glycoprotein CD4 (CD4)	P01730
CD40	CD40L receptor (CD40)	P25942
CD40-L	CD40 ligand (CD40-L)	P29965
CD5	T-cell surface glycoprotein CD5 (CD5)	P06127
CD70	CD70 antigen (CD70)	P32970
CD83	CD83 antigen (CD83)	Q01151
CD8A	T-cell surface glycoprotein CD8 alpha chain (CD8A)	P01732
CRTAM	Cytotoxic and regulatory T-cell molecule (CRTAM)	O95727
CSF-1	Macrophage colony-stimulating factor 1 (CSF-1)	P09603
CX3CL1	Fractalkine (CX3CL1)	P78423
CXCL1	C-X-C motif chemokine 1 (CXCL1)	P09341
CXCL10	C-X-C motif chemokine 10 (CXCL10)	P02778
CXCL11	C-X-C motif chemokine 11 (CXCL11)	O14625
CXCL12	Stromal cell-derived factor 1 (CXCL12)	P48061
CXCL13	C-X-C motif chemokine 13 (CXCL13)	O43927
CXCL5	C-X-C motif chemokine 5 (CXCL5)	P42830
CXCL9	C-X-C motif chemokine 9 (CXCL9)	Q07325
DCN	Decorin (DCN)	P07585
EGF	Pro-epidermal growth factor (EGF)	P01133
FASLG	Tumor necrosis factor ligand superfamily member 6 (FASLG)	P48023
FGF2	Fibroblast growth factor 2 (FGF2)	P09038
Gal-1	Galectin-1 (Gal-1)	P09382
Gal-9	Galectin-9 (Gal-9)	O00182
GZMA	Granzyme A (GZMA)	P12544
GZMB	Granzyme B (GZMB)	P10144
GZMH	Granzyme H (GZMH)	P20718
HGF	Hepatocyte growth factor (HGF)	P14210
HO-1	Heme oxygenase 1 (HO-1)	P09601
ICOSLG	ICOS ligand (ICOSLG)	O75144
IFN-gamma	Interferon gamma (IFN-gamma)	P01579
IL--1 alpha	Interleukin-1 alpha (IL-1 alpha)	P01583
IL-10	Interleukin-10 (IL10)	P22301
IL-12	Interleukin-12 (IL12)	P29459,P29460
IL-12RB1	Interleukin-12 receptor subunit beta-1 (IL12RB1)	P42701
IL-13	Interleukin-13 (IL13)	P35225
IL-15	Interleukin-15 (IL15)	P40933
IL-18	Interleukin-18 (IL18)	Q14116
IL-2	Interleukin-2 (IL2)	P60568
IL-33	Interleukin-33 (IL33)	O95760
IL-4	Interleukin-4 (IL4)	P05112
IL-5	Interleukin-5 (IL5)	P05113
IL-6	Interleukin-6 (IL6)	P05231
IL-7	Interleukin-7 (IL7)	P13232
IL-8	Interleukin-8 (IL8)	P10145
KIR3DL1	Killer cell immunoglobulin-like receptor 3DL1 (KIR3DL1)	P43629
KLRD1	Natural killer cells antigen CD94 (KLRD1)	Q13241
LAG3	Lymphocyte activation gene 3 protein (LAG3)	P18627
LAMP3	Lysosome-associated membrane glycoprotein 3 (LAMP3)	Q9UQV4
LAP TGF-beta-1	Latency-associated peptide transforming growth factor beta-1 (LAP TGF-beta-1)	P01137
MCP-1	C-C motif chemokine 2 (MCP-1)	P13500
MCP-2	C-C motif chemokine 8 (MCP-2)	P80075
MCP-3	C-C motif chemokine 7 (MCP-3)	P80098
MCP-4	C-C motif chemokine 13 (MCP-4)	Q99616
MIC-A/B	MHC class I polypeptide-related sequence A/B (MIC-A/B)	Q29983,Q29980
MMP12	Macrophage metalloproteinase-12 (MMP12)	P39900
MMP7	Matrix metalloproteinase-7 (MMP7)	P09237
MUC-16	Mucin-16 (MUC-16)	Q8WXI7
NCR1	Natural cytotoxicity triggering receptor (NCR1)	O76036
NOS3	Nitric oxide synthase, endothelial (NOS3)	P29474
PDCD1	Programmed cell death protein 1 (PDCD1)	Q15116
PDGF subunit B	Platelet-derived growth factor subunit B (PDGF subunit B)	P01127
PD-L1	Programmed cell death 1 ligand 1 (PD-L1)	Q9NZQ7
PD-L2	Programmed cell death 1 ligand 2 (PD-L2)	Q9BQ51
PGF	Placenta growth factor (PGF)	P49763
PTN	Pleiotrophin (PTN)	P21246
TIE2	Angiopoietin-1 receptor (TIE2)	Q02763
TNF	Tumor necrosis factor (TNF)	P01375
TNFRSF12A	Tumor necrosis factor receptor superfamily member 12A (TNFRSF12A)	Q9NP84
TNFRSF21	Tumor necrosis factor receptor superfamily member 21 (TNFRSF21)	O75509
TNFRSF4	Tumor necrosis factor receptor superfamily member 4 (TNFRSF4)	P43489
TNFRSF9	Tumor necrosis factor receptor superfamily member 9 (TNFRSF9)	Q07011
TNFSF14	Tumor necrosis factor ligand superfamily member 14 (TNFSF14)	O43557
TRAIL-	TNF-related apoptosis-inducing ligand (TRAIL)	P50591
TWEAK	Tumor necrosis factor ligand superfamily member 12 (TWEAK)	O43508
VEGFA	Vascular endothelial growth factor A (VEGFA)	P15692
VEGFR-2	Vascular endothelial growth factor receptor 2 (VEGFR-2)	P35968

## Sheet: Table S2
Table S2: Univariate and multivariate cox regression in the discovery cohort Proteins adjusted for CA19-9, performance status, location, gender and age and stratified by stage in multivarite analyses. In total there was 198 patients included in analyses with 190 events in univariate analysis, and 194 patients with 187 events in multivariate (4 excluded due to missing performance status). *CA199 -…
	Univariate analyses					Multivariate analyses
	HR	lower95CI	upper95CI	P-value	Adjusted P-value	HR	lower95CI	upper95CI	P-value	Adjusted P-value
ADA	1.46076	1.06584	2.00199	0.0184488	0.0390428	1.432	1.039	1.975	0.028	0.077
ADGRG1	1.24554	1.10151	1.4084	0.0004617	0.00233415	1.284	1.112	1.482	0.001	0.004
ANGPT1	0.9735	0.814836	1.16306	0.767324	0.804604	1.014	0.849	1.212	0.875	0.905
ANGPT2	1.58097	1.21269	2.0611	0.0007114	0.00323687	1.546	1.155	2.069	0.003	0.014
ARG1	1.04563	0.90012	1.21465	0.559509	0.620918	1.077	0.919	1.26	0.36	0.471
CA199*	1.09314	1.049	1.139	1.88461e-05	0.0001351
CAIX	1.58695	0.98548	2.55553	0.0574602	0.0986581	1.102	1.003	1.212	0.044	0.098
CASP-8	1.17483	1.02651	1.34459	0.0192892	0.0398936	1.168	1.013	1.347	0.033	0.082
CCL17	0.869357	0.569583	1.3269	0.516385	0.6098	0.975	0.864	1.101	0.685	0.753
CCL19	1.32047	1.10502	1.57793	0.0022222	0.00722215	1.317	1.094	1.585	0.004	0.014
CCL20	1.20798	1.10769	1.31735	1.93e-05	0.0001351	1.23	1.11	1.362	0	0.0011
CCL23	1.80409	1.41792	2.29544	1.6e-06	2.42667e-05	1.672	1.29	2.167	0	0.0013
CCL3	1.56427	0.758997	3.22389	0.225283	0.305981	1.096	0.95	1.263	0.208	0.325
CCL4	1.12523	0.937421	1.35066	0.205383	0.287536	1.14	0.947	1.372	0.167	0.282
CD244	1.16076	0.834444	1.61468	0.376038	0.462426	1.11	0.827	1.491	0.488	0.593
CD27	1.55943	1.14449	2.12482	0.0048775	0.011996	1.463	1.024	2.092	0.037	0.089
CD28	1.66827	1.1407	2.43985	0.0083233	0.019421	1.407	0.956	2.071	0.083	0.164
CD4	1.51148	0.358544	6.37181	0.573624	0.628913
CD40	1.31418	1.01633	1.6993	0.0372031	0.0720315	1.154	0.915	1.455	0.226	0.346
CD40-L	1.06356	0.947329	1.19405	0.296675	0.385677	1.036	0.915	1.174	0.576	0.665
CD5	1.41035	1.00427	1.98065	0.0471967	0.085898	1.29	0.921	1.807	0.138	0.256
CD70	1.02736	1.01331	1.04161	0.0001221	0.000653594	1.333	0.997	1.78	0.052	0.113
CD83	1.31479	0.954921	1.81029	0.0934893	0.149255	1.152	0.832	1.595	0.394	0.494
CD8A	1.16917	0.968297	1.41172	0.10416	0.160653	1.126	0.937	1.352	0.205	0.325
CRTAM	1.24876	0.999716	1.55984	0.0502937	0.0897397	1.226	0.981	1.532	0.073	0.152
CSF-1	2.84669	1.43123	5.662	0.0028644	0.00868868	2.163	1.063	4.403	0.033	0.082
CX3CL1	1.55266	1.17493	2.05184	0.001979	0.00666996	1.412	1.055	1.89	0.02	0.06
CXCL1	1.29248	1.09214	1.52956	0.0028294	0.00868868	1.279	1.061	1.541	0.01	0.033
CXCL10	1.06764	0.912581	1.24904	0.413689	0.501942	1.054	0.907	1.225	0.493	0.593
CXCL11	1.35002	0.641168	2.84254	0.429527	0.514302	1.109	0.962	1.279	0.153	0.267
CXCL12	1.70723	1.09965	2.65051	0.0171626	0.0371856	1.755	1.113	2.767	0.015	0.049
CXCL13	1.37748	1.13826	1.66696	0.0009996	0.00395494	1.382	1.126	1.698	0.002	0.011
CXCL5	1.02495	0.873421	1.20276	0.762735	0.804604	1.049	0.897	1.227	0.548	0.643
CXCL9	1.12573	0.955703	1.326	0.156305	0.237062	1.091	0.93	1.279	0.286	0.405
DCN	2.81272	1.38204	5.72446	0.004339	0.0112814	2.466	1.139	5.341	0.022	0.061
EGF	1.06768	0.958341	1.1895	0.234809	0.31423	1.03	0.92	1.153	0.604	0.68
FASLG	0.933317	0.755322	1.15326	0.522686	0.6098	0.986	0.796	1.22	0.894	0.911
FGF2	1.30863	1.06531	1.60754	0.0103863	0.0236288	1.223	0.991	1.509	0.061	0.13
Gal-1	1.44568	0.829793	2.51868	0.193172	0.279026	1.32	0.811	2.147	0.264	0.385
Gal-9	1.80008	1.20577	2.68732	0.0040377	0.0112814	1.541	1.016	2.337	0.042	0.096
GZMA	1.34606	1.00951	1.7948	0.0429241	0.0813769	1.209	0.911	1.606	0.189	0.311
GZMB	1.18802	0.996208	1.41676	0.0551529	0.0965176	1.127	0.941	1.349	0.194	0.314
GZMH	1.31067	1.08959	1.5766	0.0041007	0.0112814	1.263	1.036	1.541	0.021	0.06
HGF	1.63696	1.326	2.02084	4.5e-06	4.55e-05	1.603	1.291	1.991	0	0
HO-1	0.981634	0.844384	1.14119	0.809373	0.827561	0.991	0.864	1.137	0.9	0.911
ICOSLG	1.04005	0.760836	1.42172	0.805542	0.827561	1.07	0.8	1.43	0.649	0.722
IFN-gamma	1.07221	0.959714	1.1979	0.217621	0.300053	1.074	0.955	1.207	0.232	0.35
IL-10	2.04621	1.25279	3.34212	0.0042325	0.0112814	1.233	1.07	1.419	0.004	0.014
IL-12	1.17029	0.972838	1.40781	0.0953388	0.149583	1.099	0.916	1.319	0.309	0.423
IL-12RB1	1.63973	1.23965	2.16894	0.0005296	0.00253651	1.602	1.181	2.173	0.002	0.012
IL-15	2.7247	1.92806	3.85051	0	0	2.452	1.69	3.559	0	0
IL-18	1.39961	1.14333	1.71332	0.0011218	0.00408335	1.325	1.071	1.639	0.01	0.033
IL-33	1.51004	0.849883	2.68299	0.159923	0.238574	1.602	0.851	3.012	0.144	0.256
IL-4	1.00319	0.838682	1.19996	0.972209	0.972209	1.073	0.886	1.299	0.473	0.584
IL-5	1.03097	0.93133	1.14127	0.556445	0.620918	1.018	0.912	1.137	0.75	0.804
IL-6	1.23312	1.13838	1.33575	3e-07	5.46e-06	1.256	1.148	1.374	0	0
IL-7	1.19697	0.973934	1.47108	0.0874658	0.142132	1.247	1.012	1.537	0.039	0.09
IL-8	1.13574	1.0536	1.22429	0.0008904	0.00380835	1.141	1.045	1.245	0.003	0.014
KIR3DL1	1.05943	0.940554	1.19332	0.34177	0.426043	1.077	0.941	1.233	0.28	0.402
KLRD1	1.34885	1.09653	1.65924	0.0046257	0.0116927	1.296	1.025	1.638	0.03	0.08
LAG3	1.18219	0.921153	1.5172	0.188582	0.27679	1.132	0.872	1.468	0.352	0.468
LAMP3	1.06807	0.866121	1.3171	0.538005	0.61198	1.131	0.896	1.43	0.301	0.418
LAP-TGF-beta-1	1.2688	0.976179	1.64915	0.0751197	0.126591	1.223	0.946	1.581	0.125	0.237
MCP-1	1.13689	0.935754	1.38127	0.196522	0.27943	1.079	0.914	1.273	0.368	0.474
MCP-2	0.972001	0.818409	1.15442	0.746233	0.804604	1.014	0.852	1.207	0.872	0.905
MCP-3	1.53658	1.08157	2.183	0.0164999	0.0366217	1.044	0.948	1.151	0.382	0.485
MCP-4	0.928151	0.807825	1.0664	0.292581	0.385677	0.93	0.821	1.053	0.254	0.377
MIC-A/B	1.00999	1.00394	1.01608	0.0011887	0.00416045	1.089	0.971	1.22	0.144	0.256
MMP12	1.2461	1.09405	1.41928	0.0009207	0.00380835	1.226	1.068	1.407	0.004	0.014
MMP7	1.00029	1.00004	1.00054	0.0233571	0.0472332	1.027	0.865	1.22	0.759	0.805
MUC-16	1.39087	1.25619	1.53998	0	0	1.348	1.2	1.515	0	0
NCR1	2.03013	1.55453	2.65124	2e-07	4.55e-06	1.946	1.438	2.634	0	0
NOS3	1.77861	1.39927	2.26078	2.5e-06	2.84375e-05	1.834	1.412	2.382	0	0
PD-L1	2.08969	1.54062	2.83444	2.2e-06	2.84375e-05	2.046	1.454	2.881	0	0
PD-L2	3.46742	2.27175	5.2924	0	0	2.947	1.896	4.583	0	0
PDCD1	1.30675	1.00534	1.69852	0.0455263	0.0845488	1.251	0.968	1.616	0.087	0.168
PDGF-subunit-B	0.9765	0.793772	1.20129	0.822002	0.831136	1.009	0.831	1.227	0.924	0.924
PGF	2.22931	1.55772	3.19045	1.17e-05	0.00010647	2.329	1.53	3.543	0	0.0011
PTN	1.18073	1.05798	1.31772	0.0030143	0.00884843	1.262	1.118	1.424	0	0.0012
TIE2	1.53351	0.949228	2.47744	0.080628	0.133403	1.385	0.872	2.2	0.168	0.282
TNF	1.93415	1.20833	3.09595	0.0059885	0.0143409	1.198	1.031	1.392	0.019	0.057
TNFRSF12A	1.59467	1.27419	1.99577	4.57e-05	0.000277247	1.594	1.239	2.049	0	0.002
TNFRSF21	4.18267	2.19285	7.97807	1.4e-05	0.000115818	3.635	1.725	7.66	0.001	0.004
TNFRSF4	1.78578	1.35389	2.35545	4.05e-05	0.00026325	1.522	1.135	2.04	0.005	0.018
TNFRSF9	1.76973	1.33192	2.35144	8.27e-05	0.000470356	1.635	1.216	2.197	0.001	0.006
TNFSF14	1.16397	1.00955	1.34201	0.0365439	0.0720315	1.146	0.985	1.333	0.078	0.157
TRAIL-	0.921783	0.786634	1.08015	0.314013	0.397298	0.954	0.818	1.113	0.549	0.643
TWEAK	1.16681	0.863942	1.57585	0.314346	0.397298	1.149	0.873	1.513	0.321	0.433
VEGFA	1.42279	1.15208	1.75712	0.001058	0.00401158	1.329	1.069	1.652	0.011	0.035
VEGFR-2	0.963912	0.754039	1.2322	0.769237	0.804604	1.00817	0.7865	1.292	0.948779	0.9593
Metastatic disease	1.342	1.006	1.791	0.0456
PS 2	1.6739	0.8814	3.179	0.115
Extrahepatic BTC	0.982	0.737	1.31	0.904
Male	0.887	0.664	1.184	0.415
Age	0.998	0.984	1.012	0.737

## Sheet: Table S3
Table S3: Univariate and multivariate cox regression in validation cohorts. Proteins adjusted for PS, location and stratified by stage in multivarite analyses. *CA199 - log2 to CA199 used. In multivariate adjusted for PS, location, gender and age and stratified by stage.
	Univariate analyses								Multivariate analyses
Cohort	N	N events	Protein	HR	lower95CI	upper95CI	P-value	Adjusted P-value	N	N events	HR	lower95CI	upper95CI	P-value	Adjusted P-value
1st line validation cohort	117	113	IL-6	1.29	1.124	1.479	<0.001	0.001	108	104	1.254	1.081	1.455	0.003	0.028
1st line validation cohort	117	113	MUC-16	1.18	1.049	1.328	0.006	0.012	108	104	1.131	0.985	1.299	0.082	0.259
1st line validation cohort	117	113	PD-L2	1.069	0.886	1.29	0.488	0.512	108	104	0.993	0.798	1.234	0.947	0.976
1st line validation cohort	117	113	IL-15	2.229	1.483	3.35	<0.001	0.001	108	104	1.956	1.213	3.153	0.006	0.029
1st line validation cohort	117	113	NOS3	1.105	0.82	1.49	0.512	0.512	108	104	0.991	0.704	1.393	0.957	0.976
1st line validation cohort	117	113	NCR1	1.402	0.904	2.176	0.131	0.188	108	104	1.081	0.649	1.8	0.765	0.976
1st line validation cohort	117	113	HGF	1.337	1.08	1.654	0.008	0.013	108	104	1.301	0.948	1.787	0.104	0.259
1st line validation cohort	117	113	PD-L1	1.676	1.172	2.398	0.005	0.012	108	104	1.328	0.851	2.073	0.211	0.385
1st line validation cohort	117	113	CCL20	1.079	0.96	1.211	0.202	0.253	108	104	0.998	0.873	1.141	0.976	0.976
1st line validation cohort	117	113	PGF	2.053	1.293	3.258	0.002	0.008	108	104	1.43	0.796	2.568	0.231	0.385
2nd line cohort	54	54	IL-6	1.295	1.021	1.641	0.033	0.054	54	54	1.447	1.016	2.061	0.041	0.082
2nd line cohort	54	54	MUC-16	1.339	1.055	1.699	0.016	0.046	54	54	1.344	1.037	1.743	0.026	0.082
2nd line cohort	54	54	PD-L2	1.737	0.797	3.784	0.165	0.206	54	54	1.579	0.673	3.705	0.294	0.367
2nd line cohort	54	54	IL-15	2.773	1.189	6.463	0.018	0.046	54	54	2.542	1.003	6.446	0.049	0.082
2nd line cohort	54	54	NOS3	1.606	0.996	2.588	0.052	0.074	54	54	1.562	0.904	2.699	0.11	0.157
2nd line cohort	54	54	NCR1	1.018	0.572	1.812	0.951	0.951	54	54	0.982	0.52	1.853	0.956	0.956
2nd line cohort	54	54	HGF	1.165	0.829	1.638	0.379	0.421	54	54	1.095	0.694	1.727	0.696	0.773
2nd line cohort	54	54	PD-L1	2.499	1.167	5.35	0.018	0.046	54	54	2.587	1.087	6.16	0.032	0.082
2nd line cohort	54	54	CCL20	1.332	1.037	1.711	0.025	0.05	54	54	1.305	1.009	1.687	0.043	0.082
2nd line cohort	54	54	PGF	3.125	1.391	7.018	0.006	0.046	54	54	3.087	1.249	7.625	0.015	0.082
Surgery cohort	40	31	IL-6	1.081	0.93	1.257	0.31	0.626	To few patients for multivariate analyses
Surgery cohort	40	31	MUC-16	1.058	0.706	1.587	0.784	0.872
Surgery cohort	40	31	PD-L2	0.958	0.294	3.122	0.944	0.944
Surgery cohort	40	31	IL-15	1.486	0.599	3.685	0.393	0.626
Surgery cohort	40	31	NOS3	1.257	0.705	2.243	0.438	0.626
Surgery cohort	40	31	NCR1	0.814	0.307	2.161	0.679	0.849
Surgery cohort	40	31	HGF	1.619	0.949	2.761	0.077	0.626
Surgery cohort	40	31	PD-L1	0.693	0.277	1.734	0.433	0.626
Surgery cohort	40	31	CCL20	1.143	0.945	1.382	0.169	0.626
Surgery cohort	40	31	PGF	0.64	0.23	1.778	0.392	0.626

## Sheet: Table S4
Table S4: Differential protein concentration between groups of interest in the discovery cohort *If the medians of both groups are below LOD the test is marked as “Flag”. All protein levels are reported on log2 scale. Abbreviations: BTC, Biliary tract cancer; eCC, extrahepatic cholangiocarcinoma; GBC, gallbladder cancer; iCC, intrahepatic cholangiocarcinoma; IQR, interquartile range; LOD,= Limit …
Comparison	Protein	Test type	LOD check	Median 1. group	IQR 1. group	Median 2. group	IQR 2. group	Log2 fold change	P-value	Adjusted P-value
A: OS <= 365 days vs. OS > 365 days	MUC-16	t.test	No flag	4.548	2.22	2.98	2.927	1.2	8.6e-10	9.9e-08
A: OS <= 365 days vs. OS > 365 days	IL-6	t.test	No flag	4.263	2.08	2.913	1.968	1	1.3e-09	1.2e-07
A: OS <= 365 days vs. OS > 365 days	IL-15	t.test	No flag	5.129	0.58	4.797	0.635	0.31	3.7e-09	2.8e-07
A: OS <= 365 days vs. OS > 365 days	ADGRG1	t.test	No flag	2.819	1.74	2.276	1.147	0.51	1.1e-06	2.9e-05
A: OS <= 365 days vs. OS > 365 days	HGF	t.test	No flag	9.863	1.07	9.484	0.75	0.42	3e-06	6.8e-05
A: OS <= 365 days vs. OS > 365 days	NCR1	t.test	No flag	3.909	0.76	3.696	0.581	0.23	3.5e-05	0.00053
A: OS <= 365 days vs. OS > 365 days	CCL20	t.test	No flag	8.983	2.27	8.139	2.177	0.69	6e-05	0.00081
A: OS <= 365 days vs. OS > 365 days	KLRD1	t.test	No flag	6.68	1.02	6.391	0.87	0.31	6.1e-05	0.00081
A: OS <= 365 days vs. OS > 365 days	PD-L1	t.test	No flag	6.055	0.76	5.737	0.792	0.26	5.9e-05	0.00081
A: OS <= 365 days vs. OS > 365 days	IL-12RB1	t.test	No flag	2.206	0.73	1.933	0.727	0.21	7.5e-05	0.00096
A: OS <= 365 days vs. OS > 365 days	PTN	t.test	No flag	2.378	1.44	1.932	1.626	0.5	0.0001	0.0012
A: OS <= 365 days vs. OS > 365 days	CA199	t.test	NA	8.028	5.87	6.57	4.086	1.4	0.00012	0.0013
A: OS <= 365 days vs. OS > 365 days	TNFRSF12A	t.test	No flag	6.002	1.06	5.637	1.045	0.33	0.00012	0.0013
A: OS <= 365 days vs. OS > 365 days	VEGFA	t.test	No flag	9.273	1.41	8.672	1.427	0.41	0.00016	0.0017
A: OS <= 365 days vs. OS > 365 days	CCL23	t.test	No flag	10.7	1.22	10.195	1.287	0.38	0.00017	0.0018
A: OS <= 365 days vs. OS > 365 days	IL-10	t.test	No flag	3.93	1.06	3.526	1.092	0.41	0.00025	0.0024
A: OS <= 365 days vs. OS > 365 days	NOS3	t.test	No flag	2.33	1	2.103	0.899	0.27	0.00025	0.0024
A: OS <= 365 days vs. OS > 365 days	TNFRSF9	t.test	No flag	6.772	0.81	6.578	0.663	0.23	0.00027	0.0026
A: OS <= 365 days vs. OS > 365 days	CXCL11	t.test	No flag	8.819	1.43	8.387	1.142	0.39	0.00031	0.0028
A: OS <= 365 days vs. OS > 365 days	CXCL13	t.test	No flag	9.196	1.22	8.765	1.045	0.36	0.00033	0.003
A: OS <= 365 days vs. OS > 365 days	ANGPT2	t.test	No flag	6.229	0.94	5.826	1.026	0.27	0.0007	0.0058
A: OS <= 365 days vs. OS > 365 days	FGF2	t.test	No flag	0.203	1.57	-0.09	1.207	0.33	0.00072	0.0059
A: OS <= 365 days vs. OS > 365 days	TNFRSF4	t.test	No flag	5.719	1.17	5.409	1.126	0.28	0.00079	0.0064
A: OS <= 365 days vs. OS > 365 days	CD27	t.test	No flag	8.457	0.66	8.158	0.718	0.21	0.0013	0.0095
A: OS <= 365 days vs. OS > 365 days	Gal-9	t.test	No flag	8.458	0.55	8.205	0.504	0.18	0.0013	0.0095
A: OS <= 365 days vs. OS > 365 days	CXCL1	t.test	No flag	9.416	1.13	9.053	1.042	0.32	0.002	0.013
A: OS <= 365 days vs. OS > 365 days	TNF	t.test	No flag	3.567	1.45	3.01	1.635	0.34	0.002	0.014
A: OS <= 365 days vs. OS > 365 days	MMP12	t.test	No flag	8.172	1.68	7.774	1.124	0.38	0.0021	0.014
A: OS <= 365 days vs. OS > 365 days	CD4	t.test	No flag	4.439	0.52	4.285	0.508	0.14	0.0026	0.016
A: OS <= 365 days vs. OS > 365 days	PD-L2	t.test	No flag	2.313	1.49	1.975	1.488	0.31	0.0029	0.017
A: OS <= 365 days vs. OS > 365 days	CD28	t.test	No flag	0.633	0.55	0.516	0.453	0.13	0.0033	0.02
A: OS <= 365 days vs. OS > 365 days	PGF	t.test	No flag	7.609	1.61	7.247	1.715	0.29	0.0036	0.021
A: OS <= 365 days vs. OS > 365 days	TNFSF14	t.test	No flag	6.574	1.38	6.117	1.406	0.29	0.0046	0.025
A: OS <= 365 days vs. OS > 365 days	IL-7	t.test	No flag	5.802	1.2	5.611	1.035	0.23	0.0084	0.038
A: OS <= 365 days vs. OS > 365 days	CRTAM	t.test	No flag	5.928	0.97	5.779	0.872	0.18	0.0086	0.039
A: OS <= 365 days vs. OS > 365 days	CD40	t.test	No flag	10.271	0.74	10.001	0.632	0.19	0.011	0.047
A: OS <= 365 days vs. OS > 365 days	CXCL9	t.test	No flag	7.882	1.32	7.505	1.191	0.25	0.013	0.05
A: OS <= 365 days vs. OS > 365 days	CASP-8	t.test	No flag	5.073	2.1	4.584	1.802	0.38	0.016	0.059
A: OS <= 365 days vs. OS > 365 days	DCN	t.test	No flag	4.5	0.36	4.389	0.324	0.098	0.016	0.06
A: OS <= 365 days vs. OS > 365 days	CCL19	t.test	No flag	10.381	1.95	9.903	2.093	0.33	0.017	0.062
A: OS <= 365 days vs. OS > 365 days	MCP-3	t.test	No flag	3.081	1.21	2.813	1.114	0.27	0.017	0.062
A: OS <= 365 days vs. OS > 365 days	IL-18	t.test	No flag	9.24	1.21	8.876	1.283	0.26	0.019	0.067
A: OS <= 365 days vs. OS > 365 days	TRAIL-	t.test	No flag	8.144	0.6	8.231	0.532	-0.14	0.019	0.067
A: OS <= 365 days vs. OS > 365 days	ADA	t.test	No flag	5.185	0.85	5.002	0.668	0.14	0.029	0.09
A: OS <= 365 days vs. OS > 365 days	CSF-1	t.test	No flag	9.585	0.99	9.407	0.879	0.15	0.032	0.095
A: OS <= 365 days vs. OS > 365 days	TNFRSF21	t.test	No flag	7.491	0.45	7.348	0.401	0.096	0.036	0.11
A: OS <= 365 days vs. OS > 365 days	LAG3	t.test	No flag	3.193	2	2.957	1.791	0.24	0.049	0.13
A: OS <= 365 days vs. OS > 365 days	IL-8	t.test	No flag	8.845	2.6	8.347	2.554	0.38	0.053	0.14
A: OS <= 365 days vs. OS > 365 days	PDCD1	t.test	No flag	5.131	0.81	5.05	0.697	0.12	0.057	0.14
A: OS <= 365 days vs. OS > 365 days	GZMH	t.test	No flag	4.584	1.19	4.455	1.278	0.17	0.058	0.15
A: OS <= 365 days vs. OS > 365 days	CCL3	t.test	No flag	6.742	0.97	6.467	1.037	0.18	0.059	0.15
A: OS <= 365 days vs. OS > 365 days	LAMP3	t.test	No flag	4.942	1.1	4.834	0.849	0.14	0.059	0.15
A: OS <= 365 days vs. OS > 365 days	CD5	t.test	No flag	5.436	1.04	5.266	1.102	0.14	0.07	0.17
A: OS <= 365 days vs. OS > 365 days	TIE2	t.test	No flag	7.718	0.55	7.55	0.51	0.094	0.076	0.18
A: OS <= 365 days vs. OS > 365 days	CXCL12	t.test	No flag	0.695	1.25	0.596	1.211	0.13	0.085	0.19
A: OS <= 365 days vs. OS > 365 days	ARG1	t.test	No flag	3.72	1.53	3.357	1.678	0.2	0.091	0.2
A: OS <= 365 days vs. OS > 365 days	MIC-A/B	t.test	No flag	5.603	1.25	5.299	1.154	0.26	0.11	0.22
A: OS <= 365 days vs. OS > 365 days	IFN-gamma	t.test	No flag	6.892	1.65	6.653	1.679	0.21	0.15	0.28
A: OS <= 365 days vs. OS > 365 days	LAP-TGF-beta-1	t.test	No flag	9.82	0.99	9.629	0.689	0.11	0.15	0.28
A: OS <= 365 days vs. OS > 365 days	IL-4	t.test	No flag	0.455	0.96	0.402	1.186	0.12	0.15	0.29
A: OS <= 365 days vs. OS > 365 days	CD70	t.test	No flag	4.343	1.09	4.24	0.719	0.099	0.15	0.29
A: OS <= 365 days vs. OS > 365 days	CD244	t.test	No flag	6.527	0.61	6.39	0.58	0.066	0.21	0.36
A: OS <= 365 days vs. OS > 365 days	CXCL10	t.test	No flag	10.005	1.3	9.737	1.123	0.12	0.24	0.39
A: OS <= 365 days vs. OS > 365 days	GZMA	t.test	No flag	6.647	0.86	6.513	0.802	0.079	0.25	0.4
A: OS <= 365 days vs. OS > 365 days	MCP-4	t.test	No flag	9.639	1.19	9.588	0.944	-0.099	0.28	0.44
A: OS <= 365 days vs. OS > 365 days	CAIX	t.test	No flag	6.338	2.11	5.948	1.992	0.16	0.31	0.47
A: OS <= 365 days vs. OS > 365 days	IL-12	t.test	No flag	6.84	1.3	6.685	1.187	0.085	0.38	0.53
A: OS <= 365 days vs. OS > 365 days	VEGFR-2	t.test	No flag	7.886	0.5	7.9	0.426	-0.037	0.42	0.57
A: OS <= 365 days vs. OS > 365 days	ANGPT1	t.test	No flag	10.033	1.21	10.045	1.022	-0.093	0.43	0.57
A: OS <= 365 days vs. OS > 365 days	MMP7	t.test	No flag	11.893	0.6	11.83	0.392	-0.067	0.43	0.58
A: OS <= 365 days vs. OS > 365 days	Gal-1	t.test	No flag	6.953	0.38	6.855	0.371	0.031	0.45	0.59
A: OS <= 365 days vs. OS > 365 days	KIR3DL1	t.test	No flag	1.66	1.34	1.574	1.61	0.087	0.46	0.61
A: OS <= 365 days vs. OS > 365 days	IL-5	t.test	No flag	0.7	0.97	0.588	0.989	0.08	0.5	0.64
A: OS <= 365 days vs. OS > 365 days	CD83	t.test	No flag	2.881	0.75	2.894	0.611	0.031	0.51	0.64
A: OS <= 365 days vs. OS > 365 days	PDGF-subunit-B	t.test	No flag	9.734	0.33	9.761	0.231	-0.041	0.51	0.64
A: OS <= 365 days vs. OS > 365 days	CX3CL1	t.test	No flag	6.879	2.6	6.746	2.237	0.096	0.52	0.66
A: OS <= 365 days vs. OS > 365 days	MCP-1	t.test	No flag	11.546	0.98	11.441	0.73	0.054	0.53	0.66
A: OS <= 365 days vs. OS > 365 days	HO-1	t.test	No flag	10.891	1.56	10.813	1.367	0.069	0.56	0.68
A: OS <= 365 days vs. OS > 365 days	CXCL5	t.test	No flag	11.565	1.33	11.5	1.184	0.068	0.57	0.69
A: OS <= 365 days vs. OS > 365 days	MCP-2	t.test	No flag	7.957	0.94	8	0.812	-0.033	0.66	0.76
A: OS <= 365 days vs. OS > 365 days	CD40-L	t.test	No flag	7.553	2.46	7.291	2.477	0.061	0.72	0.81
A: OS <= 365 days vs. OS > 365 days	TWEAK	t.test	No flag	8.124	0.67	8.183	0.574	0.022	0.72	0.81
A: OS <= 365 days vs. OS > 365 days	FASLG	t.test	No flag	5.937	1.24	5.907	1.019	-0.03	0.74	0.81
A: OS <= 365 days vs. OS > 365 days	GZMB	t.test	No flag	4.295	1.57	4.243	1.026	0.027	0.8	0.86
A: OS <= 365 days vs. OS > 365 days	CCL17	t.test	No flag	9.697	1.83	9.628	1.257	-0.029	0.81	0.87
A: OS <= 365 days vs. OS > 365 days	CCL4	t.test	No flag	7.27	0.95	7.22	0.821	-0.015	0.87	0.92
A: OS <= 365 days vs. OS > 365 days	CD8A	t.test	No flag	9.272	0.95	9.147	0.88	0.015	0.88	0.92
A: OS <= 365 days vs. OS > 365 days	IL-33	t.test	Flag	0.603	0.93	0.592	0.915	-0.0093	0.88	0.92
A: OS <= 365 days vs. OS > 365 days	EGF	t.test	No flag	9.391	2.85	9.412	2.789	0.013	0.95	0.96
A: OS <= 365 days vs. OS > 365 days	ICOSLG	t.test	No flag	5.968	0.46	5.983	0.399	0.0014	0.98	0.99
B: OS <= 183 days vs. OS > 548 days	IL-15	t.test	No flag	5.239	0.61	4.708	0.529	0.55	1e-17	8.2e-15
B: OS <= 183 days vs. OS > 548 days	MUC-16	t.test	No flag	4.836	2.39	2.456	2.372	1.9	2.2e-15	8.9e-13
B: OS <= 183 days vs. OS > 548 days	HGF	t.test	No flag	10.011	0.99	9.451	0.675	0.66	9.7e-13	2e-10
B: OS <= 183 days vs. OS > 548 days	IL-6	t.test	No flag	4.436	1.84	2.726	1.856	1.5	7.3e-12	1.2e-09
B: OS <= 183 days vs. OS > 548 days	PD-L1	t.test	No flag	6.075	0.74	5.687	0.751	0.43	2.9e-09	2.4e-07
B: OS <= 183 days vs. OS > 548 days	Gal-9	t.test	No flag	8.51	0.58	8.137	0.473	0.3	5.9e-09	4e-07
B: OS <= 183 days vs. OS > 548 days	TNFRSF12A	t.test	No flag	6.105	1.18	5.498	1.056	0.57	1.2e-08	6.9e-07
B: OS <= 183 days vs. OS > 548 days	TNFRSF21	t.test	No flag	7.512	0.44	7.286	0.363	0.22	1.7e-08	9.4e-07
B: OS <= 183 days vs. OS > 548 days	CXCL13	t.test	No flag	9.338	1.41	8.734	0.992	0.64	2.3e-08	1.1e-06
B: OS <= 183 days vs. OS > 548 days	ADGRG1	t.test	No flag	3.088	1.75	2.244	1.155	0.73	9.8e-08	4.4e-06
B: OS <= 183 days vs. OS > 548 days	CCL23	t.test	No flag	10.72	1.14	10.085	1.131	0.57	3e-07	1.3e-05
B: OS <= 183 days vs. OS > 548 days	CCL20	t.test	No flag	9.1	2.12	7.956	2.121	1	3.6e-07	1.4e-05
B: OS <= 183 days vs. OS > 548 days	ANGPT2	t.test	No flag	6.185	0.83	5.735	0.823	0.44	4.4e-07	1.5e-05
B: OS <= 183 days vs. OS > 548 days	TNFRSF9	t.test	No flag	6.84	0.81	6.551	0.571	0.35	7.2e-07	2.2e-05
B: OS <= 183 days vs. OS > 548 days	VEGFA	t.test	No flag	9.263	1.32	8.571	1.2	0.59	1.2e-06	3.3e-05
B: OS <= 183 days vs. OS > 548 days	CD27	t.test	No flag	8.525	0.65	8.075	0.667	0.32	1.5e-06	3.8e-05
B: OS <= 183 days vs. OS > 548 days	TNFRSF4	t.test	No flag	5.803	1.15	5.343	0.726	0.45	1.7e-06	4.3e-05
B: OS <= 183 days vs. OS > 548 days	NOS3	t.test	No flag	2.372	0.97	2.079	0.832	0.45	2.4e-06	5.5e-05
B: OS <= 183 days vs. OS > 548 days	CD40	t.test	No flag	10.277	0.7	9.991	0.536	0.32	6.5e-06	0.00014
B: OS <= 183 days vs. OS > 548 days	IL-12RB1	t.test	No flag	2.22	0.68	1.927	0.732	0.31	7e-06	0.00015
B: OS <= 183 days vs. OS > 548 days	CA199	t.test	NA	8.224	6.29	5.907	3.22	1.9	1.1e-05	0.00021
B: OS <= 183 days vs. OS > 548 days	CXCL11	t.test	No flag	8.939	1.47	8.373	1.253	0.55	1.7e-05	0.00031
B: OS <= 183 days vs. OS > 548 days	NCR1	t.test	No flag	3.911	0.73	3.707	0.568	0.3	2.2e-05	0.00039
B: OS <= 183 days vs. OS > 548 days	CXCL1	t.test	No flag	9.418	1.17	9.004	1.075	0.49	2.8e-05	0.00045
B: OS <= 183 days vs. OS > 548 days	CD4	t.test	No flag	4.53	0.51	4.31	0.47	0.21	2.8e-05	0.00045
B: OS <= 183 days vs. OS > 548 days	PTN	t.test	No flag	2.475	1.59	1.897	1.611	0.69	3.1e-05	0.00048
B: OS <= 183 days vs. OS > 548 days	PGF	t.test	No flag	7.612	1.37	7.206	1.017	0.45	5.7e-05	0.0008
B: OS <= 183 days vs. OS > 548 days	IL-8	t.test	No flag	9.082	2.28	7.951	2.27	0.91	8.8e-05	0.0011
B: OS <= 183 days vs. OS > 548 days	IL-10	t.test	No flag	4.065	1.1	3.422	1.126	0.62	8.5e-05	0.0011
B: OS <= 183 days vs. OS > 548 days	CSF-1	t.test	No flag	9.532	0.72	9.355	0.422	0.25	0.00015	0.0017
B: OS <= 183 days vs. OS > 548 days	DCN	t.test	No flag	4.523	0.39	4.37	0.295	0.18	0.00016	0.0017
B: OS <= 183 days vs. OS > 548 days	MMP12	t.test	No flag	8.044	1.68	7.658	1.081	0.51	0.0002	0.002
B: OS <= 183 days vs. OS > 548 days	KLRD1	t.test	No flag	6.68	0.98	6.412	0.818	0.33	0.00028	0.0027
B: OS <= 183 days vs. OS > 548 days	TIE2	t.test	No flag	7.716	0.54	7.553	0.463	0.18	0.00041	0.0036
B: OS <= 183 days vs. OS > 548 days	CXCL9	t.test	No flag	7.938	1.39	7.468	1.253	0.42	0.00067	0.0056
B: OS <= 183 days vs. OS > 548 days	ADA	t.test	No flag	5.224	0.81	4.98	0.558	0.24	0.00084	0.0068
B: OS <= 183 days vs. OS > 548 days	IL-18	t.test	No flag	9.332	1.23	8.859	1.104	0.41	0.001	0.0079
B: OS <= 183 days vs. OS > 548 days	TNF	t.test	No flag	3.482	1.3	2.994	1.239	0.4	0.0026	0.016
B: OS <= 183 days vs. OS > 548 days	PD-L2	t.test	No flag	2.313	1.32	1.924	0.637	0.4	0.0031	0.019
B: OS <= 183 days vs. OS > 548 days	CD28	t.test	No flag	0.679	0.58	0.55	0.446	0.17	0.0036	0.02
B: OS <= 183 days vs. OS > 548 days	CCL19	t.test	No flag	10.369	1.79	9.704	1.404	0.47	0.0036	0.021
B: OS <= 183 days vs. OS > 548 days	TNFSF14	t.test	No flag	6.623	1.29	6.119	1.363	0.34	0.0051	0.027
B: OS <= 183 days vs. OS > 548 days	FGF2	t.test	No flag	0.08	1.51	-0.109	1.07	0.34	0.0065	0.032
B: OS <= 183 days vs. OS > 548 days	CRTAM	t.test	No flag	5.998	0.95	5.811	0.799	0.22	0.0065	0.032
B: OS <= 183 days vs. OS > 548 days	Gal-1	t.test	No flag	6.971	0.37	6.869	0.358	0.096	0.01	0.045
B: OS <= 183 days vs. OS > 548 days	TRAIL-	t.test	No flag	8.093	0.5	8.253	0.502	-0.14	0.011	0.047
B: OS <= 183 days vs. OS > 548 days	CAIX	t.test	No flag	6.567	2.14	5.748	1.575	0.51	0.012	0.048
B: OS <= 183 days vs. OS > 548 days	IL-7	t.test	No flag	5.884	1.19	5.589	1.107	0.27	0.013	0.052
B: OS <= 183 days vs. OS > 548 days	LAMP3	t.test	No flag	5.037	1.1	4.807	0.883	0.23	0.013	0.052
B: OS <= 183 days vs. OS > 548 days	CASP-8	t.test	No flag	5.073	2.06	4.618	1.525	0.42	0.024	0.078
B: OS <= 183 days vs. OS > 548 days	MIC-A/B	t.test	No flag	5.619	1.19	5.228	1.27	0.45	0.028	0.087
B: OS <= 183 days vs. OS > 548 days	PDCD1	t.test	No flag	5.13	0.81	5.07	0.652	0.16	0.031	0.092
B: OS <= 183 days vs. OS > 548 days	CD70	t.test	No flag	4.508	1.1	4.298	0.723	0.17	0.04	0.11
B: OS <= 183 days vs. OS > 548 days	ARG1	t.test	No flag	3.715	1.52	3.173	1.517	0.29	0.044	0.12
B: OS <= 183 days vs. OS > 548 days	GZMH	t.test	No flag	4.596	1.17	4.464	1.34	0.23	0.048	0.13
B: OS <= 183 days vs. OS > 548 days	KIR3DL1	t.test	No flag	1.654	1.32	1.315	1.325	0.27	0.057	0.14
B: OS <= 183 days vs. OS > 548 days	CD5	t.test	No flag	5.435	0.93	5.262	0.847	0.16	0.076	0.18
B: OS <= 183 days vs. OS > 548 days	LAP-TGF-beta-1	t.test	No flag	9.802	0.95	9.625	0.639	0.14	0.083	0.19
B: OS <= 183 days vs. OS > 548 days	MCP-1	t.test	No flag	11.613	0.89	11.382	0.702	0.15	0.085	0.19
B: OS <= 183 days vs. OS > 548 days	MCP-3	t.test	No flag	3.101	1.12	2.808	1.15	0.25	0.092	0.2
B: OS <= 183 days vs. OS > 548 days	LAG3	t.test	No flag	3.051	1.87	2.956	1.143	0.25	0.11	0.22
B: OS <= 183 days vs. OS > 548 days	CXCL10	t.test	No flag	9.904	1.19	9.644	1.183	0.19	0.12	0.24
B: OS <= 183 days vs. OS > 548 days	CXCL12	t.test	No flag	0.592	1.03	0.524	0.676	0.15	0.12	0.25
B: OS <= 183 days vs. OS > 548 days	CCL3	t.test	No flag	6.763	0.85	6.478	1.069	0.17	0.16	0.3
B: OS <= 183 days vs. OS > 548 days	CX3CL1	t.test	No flag	7.134	2.17	6.808	0.912	0.24	0.2	0.35
B: OS <= 183 days vs. OS > 548 days	VEGFR-2	t.test	No flag	7.857	0.49	7.893	0.448	-0.051	0.2	0.35
B: OS <= 183 days vs. OS > 548 days	FASLG	t.test	No flag	5.793	1.04	5.848	0.787	-0.13	0.21	0.36
B: OS <= 183 days vs. OS > 548 days	CCL17	t.test	No flag	9.55	1.73	9.591	1.169	-0.18	0.22	0.37
B: OS <= 183 days vs. OS > 548 days	MCP-4	t.test	No flag	9.546	1.28	9.591	0.923	-0.12	0.23	0.38
B: OS <= 183 days vs. OS > 548 days	IL-4	t.test	No flag	0.439	0.94	0.414	1.099	0.12	0.24	0.39
B: OS <= 183 days vs. OS > 548 days	CD8A	t.test	No flag	9.312	0.8	9.077	0.832	0.11	0.27	0.42
B: OS <= 183 days vs. OS > 548 days	HO-1	t.test	No flag	10.837	1.07	10.775	1.046	0.14	0.3	0.46
B: OS <= 183 days vs. OS > 548 days	IFN-gamma	t.test	No flag	6.846	1.52	6.72	1.781	0.17	0.33	0.48
B: OS <= 183 days vs. OS > 548 days	MCP-2	t.test	No flag	7.958	0.92	8.101	0.822	-0.08	0.35	0.5
B: OS <= 183 days vs. OS > 548 days	MMP7	t.test	No flag	11.899	0.45	11.785	0.325	0.067	0.4	0.55
B: OS <= 183 days vs. OS > 548 days	IL-12	t.test	No flag	6.774	1.4	6.645	1.159	0.089	0.47	0.62
B: OS <= 183 days vs. OS > 548 days	CD83	t.test	No flag	2.886	0.7	2.916	0.638	0.039	0.5	0.64
B: OS <= 183 days vs. OS > 548 days	CCL4	t.test	No flag	7.27	1.08	7.324	0.866	-0.072	0.5	0.64
B: OS <= 183 days vs. OS > 548 days	GZMB	t.test	No flag	4.339	1.51	4.39	1.057	0.078	0.56	0.69
B: OS <= 183 days vs. OS > 548 days	PDGF-subunit-B	t.test	No flag	9.738	0.27	9.729	0.213	0.03	0.57	0.69
B: OS <= 183 days vs. OS > 548 days	CD244	t.test	No flag	6.498	0.6	6.404	0.486	0.03	0.6	0.71
B: OS <= 183 days vs. OS > 548 days	ANGPT1	t.test	No flag	10.085	1.06	10.11	0.798	-0.069	0.6	0.71
B: OS <= 183 days vs. OS > 548 days	ICOSLG	t.test	No flag	5.944	0.42	5.995	0.399	-0.035	0.62	0.73
B: OS <= 183 days vs. OS > 548 days	GZMA	t.test	No flag	6.558	0.85	6.534	0.736	0.036	0.66	0.76
B: OS <= 183 days vs. OS > 548 days	TWEAK	t.test	No flag	8.068	0.63	8.164	0.574	0.026	0.69	0.79
B: OS <= 183 days vs. OS > 548 days	EGF	t.test	No flag	9.516	2.34	9.633	3.076	-0.093	0.7	0.8
B: OS <= 183 days vs. OS > 548 days	CXCL5	t.test	No flag	11.5	1.47	11.369	1.148	0.022	0.87	0.92
B: OS <= 183 days vs. OS > 548 days	IL-33	t.test	Flag	0.615	0.72	0.638	0.498	-0.011	0.87	0.92
B: OS <= 183 days vs. OS > 548 days	IL-5	t.test	Flag	0.653	0.98	0.59	1.055	-0.011	0.94	0.96
B: OS <= 183 days vs. OS > 548 days	CD40-L	t.test	No flag	7.553	1.92	7.618	2.472	-0.0093	0.97	0.98
C: OS <= 90 days vs. OS > 2 years	MUC-16	t.test	No flag	5.035	1.84	2.032	2.162	2.4	9.9e-14	2.7e-11
C: OS <= 90 days vs. OS > 2 years	IL-15	t.test	No flag	5.364	0.65	4.775	0.56	0.67	2.5e-11	3.4e-09
C: OS <= 90 days vs. OS > 2 years	IL-6	t.test	No flag	4.561	1.9	2.653	1.885	1.8	9.9e-10	1e-07
C: OS <= 90 days vs. OS > 2 years	HGF	t.test	No flag	10.065	1.23	9.446	0.622	0.81	7.9e-09	4.9e-07
C: OS <= 90 days vs. OS > 2 years	PD-L1	t.test	No flag	6.183	0.75	5.666	0.707	0.55	8.2e-08	3.9e-06
C: OS <= 90 days vs. OS > 2 years	CXCL13	t.test	No flag	9.465	1.68	8.558	0.884	0.88	3.3e-07	1.4e-05
C: OS <= 90 days vs. OS > 2 years	ANGPT2	t.test	No flag	6.366	0.9	5.735	0.722	0.64	4.3e-07	1.5e-05
C: OS <= 90 days vs. OS > 2 years	Gal-9	t.test	No flag	8.488	0.49	8.114	0.394	0.35	4.9e-07	1.7e-05
C: OS <= 90 days vs. OS > 2 years	CCL23	t.test	No flag	10.761	1.1	10.083	0.837	0.73	6.3e-07	2e-05
C: OS <= 90 days vs. OS > 2 years	CD27	t.test	No flag	8.611	0.66	8.079	0.592	0.43	6.3e-07	2e-05
C: OS <= 90 days vs. OS > 2 years	TNFRSF12A	t.test	No flag	6.149	1.27	5.478	1.083	0.7	9e-07	2.6e-05
C: OS <= 90 days vs. OS > 2 years	TNFRSF21	t.test	No flag	7.52	0.47	7.284	0.297	0.26	1.5e-06	3.8e-05
C: OS <= 90 days vs. OS > 2 years	TNFRSF4	t.test	No flag	5.926	1.14	5.338	0.699	0.59	6.6e-06	0.00014
C: OS <= 90 days vs. OS > 2 years	TNFRSF9	t.test	No flag	6.756	0.76	6.511	0.621	0.41	7.2e-06	0.00015
C: OS <= 90 days vs. OS > 2 years	KLRD1	t.test	No flag	6.755	1.01	6.184	0.785	0.57	9.6e-06	0.00019
C: OS <= 90 days vs. OS > 2 years	CD40	t.test	No flag	10.375	0.57	10.002	0.538	0.4	1.7e-05	0.00031
C: OS <= 90 days vs. OS > 2 years	CD4	t.test	No flag	4.55	0.46	4.312	0.448	0.27	2.3e-05	0.00039
C: OS <= 90 days vs. OS > 2 years	PGF	t.test	No flag	7.713	1.53	7.21	0.73	0.65	3.6e-05	0.00054
C: OS <= 90 days vs. OS > 2 years	ADGRG1	t.test	No flag	3.272	1.79	2.286	1.075	0.75	5.3e-05	0.00075
C: OS <= 90 days vs. OS > 2 years	CCL20	t.test	No flag	8.874	2.56	7.797	2.249	1.1	9.4e-05	0.0011
C: OS <= 90 days vs. OS > 2 years	VEGFA	t.test	No flag	9.355	1.43	8.534	1.176	0.7	9.3e-05	0.0011
C: OS <= 90 days vs. OS > 2 years	DCN	t.test	No flag	4.583	0.44	4.383	0.29	0.27	0.00012	0.0013
C: OS <= 90 days vs. OS > 2 years	IL-18	t.test	No flag	9.389	1.36	8.846	1.1	0.65	0.00014	0.0016
C: OS <= 90 days vs. OS > 2 years	PTN	t.test	No flag	2.408	1.26	1.811	1.506	0.8	0.00016	0.0017
C: OS <= 90 days vs. OS > 2 years	CSF-1	t.test	No flag	9.588	0.83	9.337	0.328	0.33	0.00018	0.0019
C: OS <= 90 days vs. OS > 2 years	IL-12RB1	t.test	No flag	2.288	0.71	1.936	0.734	0.36	0.0003	0.0028
C: OS <= 90 days vs. OS > 2 years	CRTAM	t.test	No flag	6.053	0.79	5.816	0.89	0.39	0.00038	0.0034
C: OS <= 90 days vs. OS > 2 years	NOS3	t.test	No flag	2.389	1.06	2.085	0.763	0.46	0.00046	0.004
C: OS <= 90 days vs. OS > 2 years	NCR1	t.test	No flag	3.934	0.72	3.712	0.595	0.32	0.00057	0.0049
C: OS <= 90 days vs. OS > 2 years	ADA	t.test	No flag	5.258	0.88	4.977	0.521	0.34	0.00093	0.0074
C: OS <= 90 days vs. OS > 2 years	PD-L2	t.test	No flag	2.35	1.55	1.925	0.601	0.68	0.00098	0.0077
C: OS <= 90 days vs. OS > 2 years	IL-10	t.test	No flag	4.026	1.22	3.423	1.014	0.61	0.0019	0.013
C: OS <= 90 days vs. OS > 2 years	TNF	t.test	No flag	3.511	1.08	2.968	1.076	0.54	0.0021	0.014
C: OS <= 90 days vs. OS > 2 years	IL-8	t.test	No flag	9.116	2.14	7.793	2.046	0.94	0.0023	0.015
C: OS <= 90 days vs. OS > 2 years	CASP-8	t.test	No flag	5.242	2.21	4.501	1.324	0.73	0.0024	0.015
C: OS <= 90 days vs. OS > 2 years	GZMH	t.test	No flag	4.744	0.97	4.449	1.442	0.44	0.0035	0.02
C: OS <= 90 days vs. OS > 2 years	CAIX	t.test	No flag	6.215	2.57	5.592	1.267	0.72	0.0074	0.035
C: OS <= 90 days vs. OS > 2 years	CXCL9	t.test	No flag	7.985	1.27	7.467	1.303	0.49	0.0077	0.036
C: OS <= 90 days vs. OS > 2 years	CCL19	t.test	No flag	10.347	2.04	9.693	1.332	0.58	0.0081	0.037
C: OS <= 90 days vs. OS > 2 years	TIE2	t.test	No flag	7.759	0.72	7.487	0.42	0.2	0.0083	0.038
C: OS <= 90 days vs. OS > 2 years	CD5	t.test	No flag	5.547	0.88	5.21	0.786	0.3	0.012	0.048
C: OS <= 90 days vs. OS > 2 years	MMP12	t.test	No flag	7.979	1.62	7.525	0.916	0.42	0.013	0.05
C: OS <= 90 days vs. OS > 2 years	CXCL11	t.test	No flag	8.697	1.7	8.389	1.335	0.45	0.013	0.052
C: OS <= 90 days vs. OS > 2 years	CXCL1	t.test	No flag	9.402	1.1	8.97	1.186	0.43	0.014	0.055
C: OS <= 90 days vs. OS > 2 years	FGF2	t.test	No flag	0.4	1.38	-0.121	0.778	0.4	0.015	0.057
C: OS <= 90 days vs. OS > 2 years	ARG1	t.test	No flag	3.786	1.67	3.127	1.477	0.46	0.017	0.062
C: OS <= 90 days vs. OS > 2 years	CA199	t.test	NA	7.236	6.99	6.217	3.087	1.4	0.021	0.07
C: OS <= 90 days vs. OS > 2 years	TRAIL-	t.test	No flag	8.038	0.44	8.256	0.589	-0.19	0.022	0.073
C: OS <= 90 days vs. OS > 2 years	LAG3	t.test	No flag	3.234	1.98	2.94	0.96	0.48	0.024	0.078
C: OS <= 90 days vs. OS > 2 years	MIC-A/B	t.test	No flag	5.688	1.28	5.226	1.215	0.57	0.03	0.09
C: OS <= 90 days vs. OS > 2 years	Gal-1	t.test	No flag	6.976	0.45	6.895	0.297	0.11	0.037	0.11
C: OS <= 90 days vs. OS > 2 years	TNFSF14	t.test	No flag	6.796	1.48	6.086	1.3	0.35	0.038	0.11
C: OS <= 90 days vs. OS > 2 years	LAMP3	t.test	No flag	5.074	1.13	4.819	0.932	0.25	0.053	0.14
C: OS <= 90 days vs. OS > 2 years	MCP-1	t.test	No flag	11.659	0.92	11.353	0.692	0.22	0.06	0.15
C: OS <= 90 days vs. OS > 2 years	PDCD1	t.test	No flag	5.126	0.69	5.065	0.646	0.2	0.06	0.15
C: OS <= 90 days vs. OS > 2 years	GZMA	t.test	No flag	6.594	0.98	6.416	0.633	0.2	0.066	0.16
C: OS <= 90 days vs. OS > 2 years	HO-1	t.test	No flag	10.93	1.22	10.807	0.972	0.31	0.075	0.18
C: OS <= 90 days vs. OS > 2 years	CXCL12	t.test	No flag	0.581	1.15	0.526	0.533	0.23	0.086	0.19
C: OS <= 90 days vs. OS > 2 years	IL-4	t.test	No flag	0.453	0.92	0.306	0.882	0.22	0.09	0.2
C: OS <= 90 days vs. OS > 2 years	ANGPT1	t.test	No flag	9.973	1.16	10.196	0.73	-0.31	0.095	0.2
C: OS <= 90 days vs. OS > 2 years	KIR3DL1	t.test	No flag	1.602	1.23	1.297	1.318	0.3	0.11	0.23
C: OS <= 90 days vs. OS > 2 years	IFN-gamma	t.test	No flag	7.095	1.72	6.712	1.549	0.39	0.12	0.24
C: OS <= 90 days vs. OS > 2 years	CD70	t.test	No flag	4.555	1.2	4.384	0.602	0.18	0.12	0.25
C: OS <= 90 days vs. OS > 2 years	MCP-3	t.test	No flag	3.085	0.98	2.684	1.122	0.24	0.13	0.26
C: OS <= 90 days vs. OS > 2 years	CD28	t.test	No flag	0.67	0.58	0.53	0.453	0.12	0.14	0.27
C: OS <= 90 days vs. OS > 2 years	MCP-2	t.test	No flag	7.922	1.09	8.177	0.886	-0.19	0.14	0.27
C: OS <= 90 days vs. OS > 2 years	CCL17	t.test	No flag	9.572	1.84	9.646	1.189	-0.31	0.14	0.27
C: OS <= 90 days vs. OS > 2 years	CXCL10	t.test	No flag	9.781	1.4	9.562	1.176	0.25	0.15	0.28
C: OS <= 90 days vs. OS > 2 years	VEGFR-2	t.test	No flag	7.849	0.45	7.918	0.438	-0.075	0.18	0.33
C: OS <= 90 days vs. OS > 2 years	LAP-TGF-beta-1	t.test	No flag	9.875	1.09	9.594	0.666	0.16	0.19	0.33
C: OS <= 90 days vs. OS > 2 years	IL-33	t.test	Flag	0.643	0.98	0.667	0.461	-0.13	0.2	0.35
C: OS <= 90 days vs. OS > 2 years	EGF	t.test	No flag	9.582	2.58	9.706	2.501	-0.42	0.22	0.37
C: OS <= 90 days vs. OS > 2 years	CD40-L	t.test	No flag	7.241	2.55	7.665	2.564	-0.33	0.29	0.45
C: OS <= 90 days vs. OS > 2 years	CD8A	t.test	No flag	9.414	0.82	9.121	0.835	0.17	0.3	0.46
C: OS <= 90 days vs. OS > 2 years	CXCL5	t.test	No flag	11.583	1.59	11.462	1.174	-0.19	0.35	0.5
C: OS <= 90 days vs. OS > 2 years	CCL3	t.test	No flag	6.971	0.84	6.676	1.16	0.13	0.4	0.54
C: OS <= 90 days vs. OS > 2 years	IL-5	t.test	Flag	0.653	0.83	0.487	1.119	0.16	0.45	0.59
C: OS <= 90 days vs. OS > 2 years	CD83	t.test	No flag	2.896	0.7	2.954	0.64	0.055	0.48	0.62
C: OS <= 90 days vs. OS > 2 years	CCL4	t.test	No flag	7.36	0.95	7.426	0.829	-0.093	0.5	0.64
C: OS <= 90 days vs. OS > 2 years	MCP-4	t.test	No flag	9.345	1.42	9.63	1.125	-0.086	0.58	0.7
C: OS <= 90 days vs. OS > 2 years	IL-12	t.test	No flag	6.556	1.4	6.657	1.139	-0.084	0.64	0.75
C: OS <= 90 days vs. OS > 2 years	ICOSLG	t.test	No flag	5.942	0.47	6.004	0.42	0.045	0.66	0.77
C: OS <= 90 days vs. OS > 2 years	CD244	t.test	No flag	6.533	0.6	6.398	0.545	0.035	0.67	0.77
C: OS <= 90 days vs. OS > 2 years	FASLG	t.test	No flag	5.778	1.06	5.818	0.629	0.049	0.72	0.81
C: OS <= 90 days vs. OS > 2 years	CX3CL1	t.test	No flag	7.173	2.42	6.885	0.66	0.078	0.75	0.83
C: OS <= 90 days vs. OS > 2 years	PDGF-subunit-B	t.test	No flag	9.769	0.33	9.721	0.202	0.013	0.88	0.92
C: OS <= 90 days vs. OS > 2 years	MMP7	t.test	No flag	11.893	0.46	11.849	0.304	0.014	0.91	0.94
C: OS <= 90 days vs. OS > 2 years	TWEAK	t.test	No flag	8.06	0.64	8.229	0.52	-0.0073	0.94	0.96
C: OS <= 90 days vs. OS > 2 years	GZMB	t.test	No flag	4.177	1.48	4.477	1.003	0.011	0.96	0.97
C: OS <= 90 days vs. OS > 2 years	IL-7	t.test	No flag	5.528	1.34	5.787	0.997	-0.0059	0.97	0.98
D: GemCapOx - OS <= 365 days vs. OS > 365 days	IL-15	t.test	No flag	5.229	0.61	4.885	0.631	0.27	1.7e-05	0.00031
D: GemCapOx - OS <= 365 days vs. OS > 365 days	IL-6	t.test	No flag	4.38	2.13	3.296	1.958	0.86	1.8e-05	0.00032
D: GemCapOx - OS <= 365 days vs. OS > 365 days	MUC-16	t.test	No flag	4.759	2.52	3.682	3.161	1	4.2e-05	0.00061
D: GemCapOx - OS <= 365 days vs. OS > 365 days	IL-10	t.test	No flag	3.92	1.25	3.536	1.008	0.48	0.00032	0.0029
D: GemCapOx - OS <= 365 days vs. OS > 365 days	ADGRG1	t.test	No flag	2.652	1.67	2.321	1.155	0.42	0.0011	0.0083
D: GemCapOx - OS <= 365 days vs. OS > 365 days	CXCL11	t.test	No flag	8.933	1.45	8.404	1.079	0.39	0.0014	0.01
D: GemCapOx - OS <= 365 days vs. OS > 365 days	Gal-9	t.test	No flag	8.435	0.52	8.232	0.558	0.17	0.0014	0.01
D: GemCapOx - OS <= 365 days vs. OS > 365 days	HGF	t.test	No flag	9.781	0.88	9.498	0.696	0.3	0.0021	0.014
D: GemCapOx - OS <= 365 days vs. OS > 365 days	CCL23	t.test	No flag	10.797	1.21	10.35	1.47	0.36	0.0025	0.016
D: GemCapOx - OS <= 365 days vs. OS > 365 days	KLRD1	t.test	No flag	6.684	1.02	6.435	0.795	0.26	0.0031	0.019
D: GemCapOx - OS <= 365 days vs. OS > 365 days	NCR1	t.test	No flag	3.829	0.67	3.702	0.602	0.2	0.0035	0.02
D: GemCapOx - OS <= 365 days vs. OS > 365 days	IL-12RB1	t.test	No flag	2.244	0.72	2.035	0.629	0.19	0.0037	0.021
D: GemCapOx - OS <= 365 days vs. OS > 365 days	CXCL13	t.test	No flag	9.263	1.39	9.073	0.986	0.34	0.0051	0.027
D: GemCapOx - OS <= 365 days vs. OS > 365 days	CD27	t.test	No flag	8.427	0.67	8.242	0.701	0.19	0.0065	0.032
D: GemCapOx - OS <= 365 days vs. OS > 365 days	TNFRSF9	t.test	No flag	6.769	0.82	6.611	0.556	0.2	0.0068	0.033
D: GemCapOx - OS <= 365 days vs. OS > 365 days	PD-L1	t.test	No flag	6.114	0.8	5.845	0.856	0.22	0.0074	0.035
D: GemCapOx - OS <= 365 days vs. OS > 365 days	CD4	t.test	No flag	4.373	0.61	4.245	0.526	0.14	0.0087	0.039
D: GemCapOx - OS <= 365 days vs. OS > 365 days	VEGFA	t.test	No flag	9.415	1.5	8.917	1.727	0.34	0.0091	0.04
D: GemCapOx - OS <= 365 days vs. OS > 365 days	TRAIL-	t.test	No flag	8.11	0.53	8.181	0.636	-0.14	0.011	0.047
D: GemCapOx - OS <= 365 days vs. OS > 365 days	TNFRSF12A	t.test	No flag	6.037	1.12	5.68	1.097	0.26	0.013	0.051
D: GemCapOx - OS <= 365 days vs. OS > 365 days	CA199	t.test	NA	7.313	5.62	6.443	4.147	1.1	0.019	0.067
D: GemCapOx - OS <= 365 days vs. OS > 365 days	CCL20	t.test	No flag	9.205	2.15	8.659	1.867	0.47	0.023	0.075
D: GemCapOx - OS <= 365 days vs. OS > 365 days	IL-7	t.test	No flag	5.671	1.27	5.523	1.14	0.25	0.024	0.078
D: GemCapOx - OS <= 365 days vs. OS > 365 days	ANGPT2	t.test	No flag	6.361	0.94	6.043	1.159	0.21	0.025	0.08
D: GemCapOx - OS <= 365 days vs. OS > 365 days	PTN	t.test	No flag	2.356	1.33	2.103	1.526	0.35	0.027	0.084
D: GemCapOx - OS <= 365 days vs. OS > 365 days	NOS3	t.test	No flag	2.446	1.07	2.334	0.887	0.2	0.037	0.11
D: GemCapOx - OS <= 365 days vs. OS > 365 days	TNF	t.test	No flag	3.818	1.55	3.156	1.736	0.27	0.04	0.11
D: GemCapOx - OS <= 365 days vs. OS > 365 days	TNFRSF21	t.test	No flag	7.525	0.46	7.393	0.485	0.083	0.044	0.12
D: GemCapOx - OS <= 365 days vs. OS > 365 days	TNFRSF4	t.test	No flag	5.967	1.25	5.583	1.332	0.2	0.05	0.13
D: GemCapOx - OS <= 365 days vs. OS > 365 days	MMP12	t.test	No flag	8.187	1.7	7.911	1.117	0.3	0.051	0.13
D: GemCapOx - OS <= 365 days vs. OS > 365 days	DCN	t.test	No flag	4.489	0.34	4.389	0.299	0.098	0.057	0.14
D: GemCapOx - OS <= 365 days vs. OS > 365 days	CRTAM	t.test	No flag	5.935	0.97	5.807	0.824	0.15	0.058	0.15
D: GemCapOx - OS <= 365 days vs. OS > 365 days	CD28	t.test	No flag	0.636	0.56	0.525	0.448	0.11	0.059	0.15
D: GemCapOx - OS <= 365 days vs. OS > 365 days	PGF	t.test	No flag	8	1.7	7.506	1.855	0.24	0.066	0.16
D: GemCapOx - OS <= 365 days vs. OS > 365 days	LAMP3	t.test	No flag	4.884	1.08	4.81	0.976	0.17	0.071	0.17
D: GemCapOx - OS <= 365 days vs. OS > 365 days	CCL19	t.test	No flag	10.767	1.82	10.218	2.285	0.3	0.085	0.19
D: GemCapOx - OS <= 365 days vs. OS > 365 days	CSF-1	t.test	No flag	9.677	1.06	9.489	1.074	0.13	0.086	0.19
D: GemCapOx - OS <= 365 days vs. OS > 365 days	CXCL1	t.test	No flag	9.356	1.3	9.062	1.117	0.21	0.091	0.2
D: GemCapOx - OS <= 365 days vs. OS > 365 days	CD40	t.test	No flag	10.231	0.83	10.013	0.622	0.13	0.091	0.2
D: GemCapOx - OS <= 365 days vs. OS > 365 days	PD-L2	t.test	No flag	2.555	1.6	2.159	1.737	0.25	0.098	0.21
D: GemCapOx - OS <= 365 days vs. OS > 365 days	TIE2	t.test	No flag	7.777	0.54	7.605	0.611	0.087	0.12	0.24
D: GemCapOx - OS <= 365 days vs. OS > 365 days	FGF2	t.test	No flag	0.263	1.64	0.128	1.486	0.21	0.13	0.26
D: GemCapOx - OS <= 365 days vs. OS > 365 days	TNFSF14	t.test	No flag	6.212	1.2	5.976	1.153	0.17	0.13	0.27
D: GemCapOx - OS <= 365 days vs. OS > 365 days	CXCL9	t.test	No flag	7.938	1.27	7.806	1.213	0.17	0.16	0.3
D: GemCapOx - OS <= 365 days vs. OS > 365 days	KIR3DL1	t.test	No flag	1.812	1.16	1.397	1.585	0.21	0.17	0.32
D: GemCapOx - OS <= 365 days vs. OS > 365 days	IL-5	t.test	No flag	0.77	1.02	0.66	1.018	0.21	0.18	0.33
D: GemCapOx - OS <= 365 days vs. OS > 365 days	CD5	t.test	No flag	5.567	1.19	5.482	1.255	0.13	0.19	0.34
D: GemCapOx - OS <= 365 days vs. OS > 365 days	IL-18	t.test	No flag	9.339	1.26	9.115	1.33	0.17	0.23	0.38
D: GemCapOx - OS <= 365 days vs. OS > 365 days	CD244	t.test	No flag	6.569	0.63	6.432	0.562	0.067	0.24	0.39
D: GemCapOx - OS <= 365 days vs. OS > 365 days	Gal-1	t.test	No flag	6.887	0.38	6.808	0.369	0.04	0.28	0.43
D: GemCapOx - OS <= 365 days vs. OS > 365 days	LAG3	t.test	No flag	3.634	2.11	3.339	2.096	0.16	0.3	0.46
D: GemCapOx - OS <= 365 days vs. OS > 365 days	PDCD1	t.test	No flag	5.163	0.82	5.165	0.771	0.081	0.31	0.46
D: GemCapOx - OS <= 365 days vs. OS > 365 days	CD70	t.test	No flag	4.189	1.16	4.144	0.799	0.092	0.31	0.47
D: GemCapOx - OS <= 365 days vs. OS > 365 days	LAP-TGF-beta-1	t.test	No flag	9.794	1.04	9.678	0.707	0.088	0.31	0.47
D: GemCapOx - OS <= 365 days vs. OS > 365 days	CCL3	t.test	No flag	6.568	1	6.29	0.879	0.086	0.32	0.48
D: GemCapOx - OS <= 365 days vs. OS > 365 days	MCP-3	t.test	No flag	2.793	1.42	2.746	1.132	0.12	0.33	0.48
D: GemCapOx - OS <= 365 days vs. OS > 365 days	MIC-A/B	t.test	No flag	5.61	1.38	5.379	1.299	0.22	0.34	0.49
D: GemCapOx - OS <= 365 days vs. OS > 365 days	MCP-4	t.test	No flag	9.641	1.19	9.602	0.802	-0.094	0.37	0.52
D: GemCapOx - OS <= 365 days vs. OS > 365 days	CX3CL1	t.test	No flag	6.485	3.05	6.478	2.873	0.18	0.37	0.53
D: GemCapOx - OS <= 365 days vs. OS > 365 days	GZMH	t.test	No flag	4.439	1.29	4.416	1.015	0.097	0.37	0.53
D: GemCapOx - OS <= 365 days vs. OS > 365 days	ADA	t.test	No flag	5.218	0.83	5.095	0.772	0.069	0.37	0.53
D: GemCapOx - OS <= 365 days vs. OS > 365 days	CASP-8	t.test	No flag	5.253	2.66	4.998	2.4	0.18	0.41	0.55
D: GemCapOx - OS <= 365 days vs. OS > 365 days	VEGFR-2	t.test	No flag	7.888	0.56	7.934	0.467	-0.034	0.45	0.59
D: GemCapOx - OS <= 365 days vs. OS > 365 days	ICOSLG	t.test	No flag	5.948	0.51	5.977	0.431	0.048	0.54	0.67
D: GemCapOx - OS <= 365 days vs. OS > 365 days	FASLG	t.test	No flag	6.25	1.4	6.15	1.302	-0.07	0.54	0.67
D: GemCapOx - OS <= 365 days vs. OS > 365 days	CCL4	t.test	No flag	7.063	0.91	7.089	0.795	-0.049	0.55	0.68
D: GemCapOx - OS <= 365 days vs. OS > 365 days	CXCL12	t.test	No flag	0.926	1.37	0.812	1.478	0.056	0.59	0.71
D: GemCapOx - OS <= 365 days vs. OS > 365 days	IL-4	t.test	No flag	0.503	1.02	0.491	1.258	0.053	0.61	0.72
D: GemCapOx - OS <= 365 days vs. OS > 365 days	MMP7	t.test	No flag	11.804	0.75	11.716	0.576	-0.049	0.62	0.73
D: GemCapOx - OS <= 365 days vs. OS > 365 days	IFN-gamma	t.test	No flag	6.927	1.64	6.755	1.517	0.085	0.63	0.74
D: GemCapOx - OS <= 365 days vs. OS > 365 days	CXCL5	t.test	No flag	11.359	1.47	11.5	1.389	0.073	0.63	0.74
D: GemCapOx - OS <= 365 days vs. OS > 365 days	MCP-2	t.test	No flag	7.844	0.87	7.963	0.736	-0.037	0.64	0.75
D: GemCapOx - OS <= 365 days vs. OS > 365 days	CXCL10	t.test	No flag	9.961	1.32	9.793	1.065	0.051	0.65	0.76
D: GemCapOx - OS <= 365 days vs. OS > 365 days	IL-12	t.test	No flag	6.909	1.29	6.817	1.119	0.05	0.66	0.76
D: GemCapOx - OS <= 365 days vs. OS > 365 days	ARG1	t.test	No flag	3.72	1.53	3.776	1.863	0.069	0.67	0.77
D: GemCapOx - OS <= 365 days vs. OS > 365 days	IL-8	t.test	No flag	8.436	2.7	8.363	2.381	0.094	0.71	0.8
D: GemCapOx - OS <= 365 days vs. OS > 365 days	TWEAK	t.test	No flag	8.036	0.61	8.17	0.566	-0.023	0.71	0.8
D: GemCapOx - OS <= 365 days vs. OS > 365 days	HO-1	t.test	No flag	10.998	1.93	11.142	2	-0.051	0.72	0.81
D: GemCapOx - OS <= 365 days vs. OS > 365 days	GZMB	t.test	No flag	4.056	1.55	4.037	1.398	0.045	0.74	0.82
D: GemCapOx - OS <= 365 days vs. OS > 365 days	CD8A	t.test	No flag	9.382	0.96	9.35	0.939	-0.036	0.74	0.82
D: GemCapOx - OS <= 365 days vs. OS > 365 days	CAIX	t.test	No flag	6.338	2.36	6.115	2.716	-0.069	0.75	0.83
D: GemCapOx - OS <= 365 days vs. OS > 365 days	MCP-1	t.test	No flag	11.306	0.91	11.478	0.718	-0.026	0.77	0.84
D: GemCapOx - OS <= 365 days vs. OS > 365 days	PDGF-subunit-B	t.test	No flag	9.738	0.41	9.769	0.333	0.015	0.81	0.87
D: GemCapOx - OS <= 365 days vs. OS > 365 days	ANGPT1	t.test	No flag	9.616	1.78	9.752	1.647	-0.025	0.87	0.92
D: GemCapOx - OS <= 365 days vs. OS > 365 days	CCL17	t.test	No flag	9.615	1.74	9.56	1.302	0.022	0.88	0.92
D: GemCapOx - OS <= 365 days vs. OS > 365 days	IL-33	t.test	Flag	0.436	1.1	0.446	1.154	0.013	0.88	0.92
D: GemCapOx - OS <= 365 days vs. OS > 365 days	CD40-L	t.test	No flag	6.591	2.96	6.631	2.909	-0.03	0.89	0.93
D: GemCapOx - OS <= 365 days vs. OS > 365 days	EGF	t.test	No flag	8.359	3.2	8.163	3.556	0.018	0.94	0.96
D: GemCapOx - OS <= 365 days vs. OS > 365 days	CD83	t.test	No flag	2.818	0.76	2.861	0.553	0.0023	0.97	0.98
D: GemCapOx - OS <= 365 days vs. OS > 365 days	GZMA	t.test	No flag	6.674	0.87	6.584	0.788	-0.0013	0.99	0.99
E: CisGem - OS <= 365 days vs. OS > 365 days	IL-6	t.test	No flag	3.846	1.48	2.35	1.605	1.2	0.0001	0.0012
E: CisGem - OS <= 365 days vs. OS > 365 days	MUC-16	t.test	No flag	4.209	1.96	2.891	2.59	1.1	0.002	0.014
E: CisGem - OS <= 365 days vs. OS > 365 days	NOS3	t.test	No flag	2.161	0.84	1.869	0.68	0.39	0.0042	0.023
E: CisGem - OS <= 365 days vs. OS > 365 days	FGF2	t.test	No flag	-0.076	0.97	-0.266	0.703	0.33	0.017	0.061
E: CisGem - OS <= 365 days vs. OS > 365 days	IL-15	t.test	No flag	5.017	0.46	4.601	0.447	0.27	0.02	0.069
E: CisGem - OS <= 365 days vs. OS > 365 days	NCR1	t.test	No flag	4.006	0.8	3.598	0.681	0.31	0.025	0.08
E: CisGem - OS <= 365 days vs. OS > 365 days	PTN	t.test	No flag	1.93	2.03	1.54	1.312	0.59	0.029	0.088
E: CisGem - OS <= 365 days vs. OS > 365 days	TNFSF14	t.test	No flag	7.299	1.11	6.461	1.331	0.53	0.041	0.12
E: CisGem - OS <= 365 days vs. OS > 365 days	PD-L2	t.test	No flag	2.12	0.56	1.803	0.495	0.25	0.042	0.12
E: CisGem - OS <= 365 days vs. OS > 365 days	HGF	t.test	No flag	10.054	1.09	9.48	0.613	0.54	0.047	0.13
E: CisGem - OS <= 365 days vs. OS > 365 days	CCL20	t.test	No flag	8.28	1.39	7.409	2.031	0.74	0.051	0.13
E: CisGem - OS <= 365 days vs. OS > 365 days	ADGRG1	t.test	No flag	2.71	1.2	2.136	1.271	0.41	0.08	0.19
E: CisGem - OS <= 365 days vs. OS > 365 days	CASP-8	t.test	No flag	4.5	1.36	4.165	0.831	0.4	0.081	0.19
E: CisGem - OS <= 365 days vs. OS > 365 days	CD40-L	t.test	No flag	8.113	0.93	7.82	1.306	0.46	0.092	0.2
E: CisGem - OS <= 365 days vs. OS > 365 days	CAIX	t.test	No flag	6.585	1.84	5.624	1.55	0.47	0.14	0.27
E: CisGem - OS <= 365 days vs. OS > 365 days	IL-12RB1	t.test	No flag	1.927	0.68	1.72	0.523	0.16	0.15	0.28
E: CisGem - OS <= 365 days vs. OS > 365 days	VEGFA	t.test	No flag	8.913	0.96	8.429	0.873	0.37	0.16	0.3
E: CisGem - OS <= 365 days vs. OS > 365 days	CA199	t.test	NA	7.577	5.21	6.845	3.477	0.97	0.17	0.32
E: CisGem - OS <= 365 days vs. OS > 365 days	IL-8	t.test	No flag	9.462	1.92	8.606	2.755	0.58	0.18	0.33
E: CisGem - OS <= 365 days vs. OS > 365 days	CXCL1	t.test	No flag	9.439	0.88	9.038	0.591	0.37	0.18	0.33
E: CisGem - OS <= 365 days vs. OS > 365 days	CD28	t.test	No flag	0.548	0.51	0.456	0.581	0.11	0.2	0.35
E: CisGem - OS <= 365 days vs. OS > 365 days	IL-10	t.test	No flag	3.982	0.82	3.49	1.143	0.24	0.21	0.36
E: CisGem - OS <= 365 days vs. OS > 365 days	MMP12	t.test	No flag	8.114	1.55	7.664	1.103	0.36	0.22	0.37
E: CisGem - OS <= 365 days vs. OS > 365 days	CCL23	t.test	No flag	10.441	0.8	9.855	0.81	0.32	0.22	0.37
E: CisGem - OS <= 365 days vs. OS > 365 days	MCP-4	t.test	No flag	9.226	1.1	9.344	1.001	-0.32	0.22	0.37
E: CisGem - OS <= 365 days vs. OS > 365 days	PD-L1	t.test	No flag	5.835	0.43	5.586	0.732	0.17	0.23	0.38
E: CisGem - OS <= 365 days vs. OS > 365 days	IL-5	t.test	Flag	0.427	0.74	0.425	1.023	-0.29	0.23	0.38
E: CisGem - OS <= 365 days vs. OS > 365 days	TNFRSF4	t.test	No flag	5.317	0.81	5.145	0.84	0.2	0.26	0.41
E: CisGem - OS <= 365 days vs. OS > 365 days	TNFRSF12A	t.test	No flag	5.722	0.81	5.498	0.879	0.21	0.27	0.42
E: CisGem - OS <= 365 days vs. OS > 365 days	ADA	t.test	No flag	5.091	0.71	4.784	0.424	0.16	0.28	0.43
E: CisGem - OS <= 365 days vs. OS > 365 days	ARG1	t.test	No flag	3.517	1.38	3.173	1.372	0.24	0.3	0.46
E: CisGem - OS <= 365 days vs. OS > 365 days	PDGF-subunit-B	t.test	No flag	9.733	0.15	9.749	0.11	-0.21	0.31	0.47
E: CisGem - OS <= 365 days vs. OS > 365 days	TRAIL-	t.test	No flag	8.293	0.61	8.253	0.365	-0.2	0.32	0.47
E: CisGem - OS <= 365 days vs. OS > 365 days	IFN-gamma	t.test	No flag	6.79	1.86	6.43	1.31	0.32	0.33	0.48
E: CisGem - OS <= 365 days vs. OS > 365 days	MCP-3	t.test	No flag	3.214	1.06	3.029	0.953	0.3	0.33	0.49
E: CisGem - OS <= 365 days vs. OS > 365 days	CXCL12	t.test	No flag	0.422	0.47	0.389	0.436	0.099	0.35	0.5
E: CisGem - OS <= 365 days vs. OS > 365 days	EGF	t.test	No flag	10.175	1.45	9.882	1.252	0.3	0.36	0.51
E: CisGem - OS <= 365 days vs. OS > 365 days	CD4	t.test	No flag	4.522	0.39	4.3	0.467	0.12	0.36	0.51
E: CisGem - OS <= 365 days vs. OS > 365 days	CXCL13	t.test	No flag	9.041	1.01	8.521	0.913	0.21	0.38	0.53
E: CisGem - OS <= 365 days vs. OS > 365 days	KLRD1	t.test	No flag	6.503	0.79	6.171	0.877	0.18	0.38	0.53
E: CisGem - OS <= 365 days vs. OS > 365 days	FASLG	t.test	No flag	5.853	0.67	5.793	0.601	-0.16	0.38	0.53
E: CisGem - OS <= 365 days vs. OS > 365 days	KIR3DL1	t.test	No flag	1.211	1.71	1.622	1.848	-0.21	0.39	0.54
E: CisGem - OS <= 365 days vs. OS > 365 days	MIC-A/B	t.test	No flag	5.42	1.2	5.089	0.855	0.24	0.4	0.55
E: CisGem - OS <= 365 days vs. OS > 365 days	IL-18	t.test	No flag	8.968	1.02	8.493	1.007	0.19	0.4	0.55
E: CisGem - OS <= 365 days vs. OS > 365 days	GZMH	t.test	No flag	4.589	0.97	4.258	1.494	0.18	0.4	0.55
E: CisGem - OS <= 365 days vs. OS > 365 days	IL-7	t.test	No flag	5.799	0.95	5.673	0.83	0.17	0.4	0.55
E: CisGem - OS <= 365 days vs. OS > 365 days	CD27	t.test	No flag	8.351	0.58	8.021	0.683	0.17	0.43	0.57
E: CisGem - OS <= 365 days vs. OS > 365 days	PGF	t.test	No flag	7.368	0.37	7.013	0.584	0.16	0.44	0.58
E: CisGem - OS <= 365 days vs. OS > 365 days	ANGPT2	t.test	No flag	5.94	0.75	5.663	0.816	0.14	0.44	0.58
E: CisGem - OS <= 365 days vs. OS > 365 days	TNF	t.test	No flag	3.274	0.83	2.936	0.939	0.17	0.47	0.61
E: CisGem - OS <= 365 days vs. OS > 365 days	TNFRSF9	t.test	No flag	6.647	0.86	6.509	0.704	0.12	0.49	0.63
E: CisGem - OS <= 365 days vs. OS > 365 days	MMP7	t.test	No flag	11.989	0.26	11.882	0.237	-0.19	0.49	0.63
E: CisGem - OS <= 365 days vs. OS > 365 days	IL-33	t.test	Flag	0.715	0.4	0.669	0.315	0.064	0.5	0.64
E: CisGem - OS <= 365 days vs. OS > 365 days	MCP-2	t.test	No flag	8.139	1.04	8.033	0.755	-0.15	0.5	0.64
E: CisGem - OS <= 365 days vs. OS > 365 days	CD40	t.test	No flag	10.265	0.6	9.974	0.496	0.16	0.51	0.64
E: CisGem - OS <= 365 days vs. OS > 365 days	ICOSLG	t.test	No flag	5.947	0.23	5.929	0.339	-0.097	0.52	0.65
E: CisGem - OS <= 365 days vs. OS > 365 days	CCL17	t.test	No flag	9.746	1.85	9.656	1.006	-0.19	0.52	0.65
E: CisGem - OS <= 365 days vs. OS > 365 days	CXCL11	t.test	No flag	8.711	1.38	8.368	1.259	0.18	0.53	0.66
E: CisGem - OS <= 365 days vs. OS > 365 days	CCL3	t.test	No flag	6.753	0.75	6.54	1.273	0.16	0.54	0.67
E: CisGem - OS <= 365 days vs. OS > 365 days	CXCL10	t.test	No flag	9.495	1.44	9.48	1.429	-0.16	0.55	0.68
E: CisGem - OS <= 365 days vs. OS > 365 days	IL-4	t.test	No flag	0.394	0.67	0.457	0.898	0.097	0.58	0.7
E: CisGem - OS <= 365 days vs. OS > 365 days	PDCD1	t.test	No flag	4.988	0.5	4.798	0.486	0.075	0.59	0.71
E: CisGem - OS <= 365 days vs. OS > 365 days	CXCL5	t.test	No flag	11.894	0.99	11.448	0.995	0.14	0.62	0.74
E: CisGem - OS <= 365 days vs. OS > 365 days	GZMA	t.test	No flag	6.441	0.72	6.208	0.832	0.082	0.63	0.74
E: CisGem - OS <= 365 days vs. OS > 365 days	IL-12	t.test	No flag	6.642	1.32	6.35	1.097	0.1	0.67	0.77
E: CisGem - OS <= 365 days vs. OS > 365 days	CD5	t.test	No flag	5.165	0.68	4.917	0.632	0.07	0.67	0.77
E: CisGem - OS <= 365 days vs. OS > 365 days	CD83	t.test	No flag	2.913	0.79	2.732	0.46	0.044	0.7	0.79
E: CisGem - OS <= 365 days vs. OS > 365 days	LAG3	t.test	No flag	2.841	0.79	2.718	0.61	0.078	0.71	0.8
E: CisGem - OS <= 365 days vs. OS > 365 days	Gal-1	t.test	No flag	7.006	0.3	6.976	0.276	-0.054	0.72	0.81
E: CisGem - OS <= 365 days vs. OS > 365 days	DCN	t.test	No flag	4.381	0.37	4.361	0.295	-0.036	0.73	0.81
E: CisGem - OS <= 365 days vs. OS > 365 days	ANGPT1	t.test	No flag	10.257	0.4	10.123	0.446	-0.079	0.73	0.81
E: CisGem - OS <= 365 days vs. OS > 365 days	CRTAM	t.test	No flag	5.781	0.79	5.59	0.85	0.061	0.74	0.82
E: CisGem - OS <= 365 days vs. OS > 365 days	CX3CL1	t.test	No flag	7.191	0.68	7.05	0.599	0.072	0.75	0.83
E: CisGem - OS <= 365 days vs. OS > 365 days	LAP-TGF-beta-1	t.test	No flag	9.782	0.76	9.484	0.603	0.071	0.76	0.83
E: CisGem - OS <= 365 days vs. OS > 365 days	CD70	t.test	No flag	4.489	0.84	4.247	0.598	0.043	0.76	0.83
E: CisGem - OS <= 365 days vs. OS > 365 days	HO-1	t.test	No flag	10.76	0.67	10.424	0.807	0.08	0.78	0.85
E: CisGem - OS <= 365 days vs. OS > 365 days	TWEAK	t.test	No flag	8.31	0.58	8.227	0.596	0.059	0.78	0.85
E: CisGem - OS <= 365 days vs. OS > 365 days	Gal-9	t.test	No flag	8.339	0.59	8.161	0.392	0.055	0.78	0.85
E: CisGem - OS <= 365 days vs. OS > 365 days	CSF-1	t.test	No flag	9.46	0.29	9.248	0.327	0.053	0.8	0.86
E: CisGem - OS <= 365 days vs. OS > 365 days	VEGFR-2	t.test	No flag	7.883	0.38	7.829	0.344	-0.042	0.8	0.86
E: CisGem - OS <= 365 days vs. OS > 365 days	CD244	t.test	No flag	6.387	0.57	6.243	0.593	0.036	0.82	0.88
E: CisGem - OS <= 365 days vs. OS > 365 days	TIE2	t.test	No flag	7.605	0.41	7.427	0.363	0.033	0.85	0.9
E: CisGem - OS <= 365 days vs. OS > 365 days	CXCL9	t.test	No flag	7.529	1.34	7.283	0.774	0.043	0.86	0.91
E: CisGem - OS <= 365 days vs. OS > 365 days	MCP-1	t.test	No flag	11.668	0.82	11.352	0.83	-0.049	0.86	0.91
E: CisGem - OS <= 365 days vs. OS > 365 days	LAMP3	t.test	No flag	4.88	1.03	4.809	0.721	0.026	0.88	0.92
E: CisGem - OS <= 365 days vs. OS > 365 days	GZMB	t.test	No flag	4.521	1.1	4.48	0.767	0.03	0.89	0.93
E: CisGem - OS <= 365 days vs. OS > 365 days	CCL19	t.test	No flag	9.653	1.35	9.672	1.001	0.036	0.9	0.93
E: CisGem - OS <= 365 days vs. OS > 365 days	TNFRSF21	t.test	No flag	7.412	0.52	7.218	0.28	0.018	0.91	0.94
E: CisGem - OS <= 365 days vs. OS > 365 days	CCL4	t.test	No flag	7.458	0.73	7.35	0.887	-0.01	0.97	0.98
E: CisGem - OS <= 365 days vs. OS > 365 days	CD8A	t.test	No flag	9.141	0.9	8.905	1.232	0.0067	0.98	0.99
F: iCC - OS <= 365 days vs. OS > 365 days	IL-6	t.test	No flag	4.22	2.26	2.802	1.962	1.2	2e-06	4.9e-05
F: iCC - OS <= 365 days vs. OS > 365 days	MUC-16	t.test	No flag	4.849	2.28	3.23	2.791	1.2	2.7e-05	0.00044
F: iCC - OS <= 365 days vs. OS > 365 days	HGF	t.test	No flag	10.159	1.12	9.575	0.851	0.6	0.00021	0.0021
F: iCC - OS <= 365 days vs. OS > 365 days	IL-15	t.test	No flag	5.18	0.53	4.769	0.74	0.33	0.0005	0.0043
F: iCC - OS <= 365 days vs. OS > 365 days	IL-12RB1	t.test	No flag	2.245	0.76	1.824	0.78	0.28	0.0013	0.0099
F: iCC - OS <= 365 days vs. OS > 365 days	NOS3	t.test	No flag	2.391	1.22	2.085	0.965	0.39	0.0014	0.01
F: iCC - OS <= 365 days vs. OS > 365 days	CA199	t.test	NA	8.087	5.12	6.245	3.666	1.6	0.0023	0.015
F: iCC - OS <= 365 days vs. OS > 365 days	MCP-3	t.test	No flag	3.214	1.35	2.834	1.194	0.45	0.0041	0.023
F: iCC - OS <= 365 days vs. OS > 365 days	PD-L1	t.test	No flag	6.039	0.8	5.585	0.831	0.32	0.0044	0.024
F: iCC - OS <= 365 days vs. OS > 365 days	TNFRSF9	t.test	No flag	6.894	0.79	6.606	0.546	0.3	0.005	0.027
F: iCC - OS <= 365 days vs. OS > 365 days	KLRD1	t.test	No flag	6.654	1.04	6.188	0.778	0.36	0.0056	0.029
F: iCC - OS <= 365 days vs. OS > 365 days	CXCL11	t.test	No flag	8.807	1.19	8.31	1.112	0.44	0.0063	0.031
F: iCC - OS <= 365 days vs. OS > 365 days	PTN	t.test	No flag	2.468	1.84	1.967	1.529	0.56	0.0072	0.035
F: iCC - OS <= 365 days vs. OS > 365 days	NCR1	t.test	No flag	3.968	0.84	3.703	0.56	0.24	0.0098	0.043
F: iCC - OS <= 365 days vs. OS > 365 days	VEGFA	t.test	No flag	9.263	1.26	8.421	1.446	0.48	0.01	0.044
F: iCC - OS <= 365 days vs. OS > 365 days	CASP-8	t.test	No flag	5.218	2.3	4.509	1.531	0.63	0.011	0.047
F: iCC - OS <= 365 days vs. OS > 365 days	FGF2	t.test	No flag	-0.049	1.37	-0.271	1.098	0.37	0.012	0.049
F: iCC - OS <= 365 days vs. OS > 365 days	TNFRSF12A	t.test	No flag	6.064	1.15	5.711	1.034	0.35	0.013	0.052
F: iCC - OS <= 365 days vs. OS > 365 days	ADGRG1	t.test	No flag	2.97	1.65	2.596	1.33	0.39	0.015	0.057
F: iCC - OS <= 365 days vs. OS > 365 days	TNFSF14	t.test	No flag	6.583	1.41	6.171	1.322	0.4	0.017	0.061
F: iCC - OS <= 365 days vs. OS > 365 days	GZMH	t.test	No flag	4.554	1.11	4.29	0.911	0.3	0.018	0.064
F: iCC - OS <= 365 days vs. OS > 365 days	TNFRSF4	t.test	No flag	5.704	1.21	5.361	1.093	0.32	0.019	0.067
F: iCC - OS <= 365 days vs. OS > 365 days	CD4	t.test	No flag	4.456	0.51	4.254	0.543	0.18	0.021	0.07
F: iCC - OS <= 365 days vs. OS > 365 days	CXCL13	t.test	No flag	9.505	1.4	9.191	0.92	0.37	0.025	0.08
F: iCC - OS <= 365 days vs. OS > 365 days	CCL23	t.test	No flag	10.743	1.27	10.176	1.099	0.39	0.028	0.086
F: iCC - OS <= 365 days vs. OS > 365 days	CD28	t.test	No flag	0.643	0.56	0.476	0.523	0.15	0.03	0.09
F: iCC - OS <= 365 days vs. OS > 365 days	TNF	t.test	No flag	3.574	1.45	2.912	1.417	0.37	0.032	0.095
F: iCC - OS <= 365 days vs. OS > 365 days	CCL20	t.test	No flag	9.205	2.47	8.715	2.629	0.6	0.036	0.11
F: iCC - OS <= 365 days vs. OS > 365 days	CXCL1	t.test	No flag	9.576	1.38	9.19	1.207	0.38	0.039	0.11
F: iCC - OS <= 365 days vs. OS > 365 days	CCL3	t.test	No flag	6.732	0.92	6.288	0.897	0.3	0.041	0.12
F: iCC - OS <= 365 days vs. OS > 365 days	IL-10	t.test	No flag	3.982	1.12	3.55	1.284	0.34	0.044	0.12
F: iCC - OS <= 365 days vs. OS > 365 days	CD27	t.test	No flag	8.476	0.71	8.02	0.897	0.24	0.055	0.14
F: iCC - OS <= 365 days vs. OS > 365 days	LAMP3	t.test	No flag	4.887	0.95	4.672	0.818	0.22	0.055	0.14
F: iCC - OS <= 365 days vs. OS > 365 days	Gal-9	t.test	No flag	8.51	0.54	8.219	0.528	0.19	0.062	0.15
F: iCC - OS <= 365 days vs. OS > 365 days	PGF	t.test	No flag	7.628	1.5	7.22	1.387	0.31	0.071	0.17
F: iCC - OS <= 365 days vs. OS > 365 days	ARG1	t.test	No flag	3.752	1.37	3.333	1.718	0.34	0.08	0.18
F: iCC - OS <= 365 days vs. OS > 365 days	ANGPT2	t.test	No flag	6.369	0.92	5.948	0.866	0.24	0.08	0.18
F: iCC - OS <= 365 days vs. OS > 365 days	CCL19	t.test	No flag	10.298	1.92	9.849	1.513	0.37	0.088	0.2
F: iCC - OS <= 365 days vs. OS > 365 days	IL-7	t.test	No flag	5.799	1.15	5.539	1.092	0.23	0.088	0.2
F: iCC - OS <= 365 days vs. OS > 365 days	IL-18	t.test	No flag	9.24	1.23	8.674	1.294	0.33	0.09	0.2
F: iCC - OS <= 365 days vs. OS > 365 days	PD-L2	t.test	No flag	2.223	1.46	1.934	0.937	0.27	0.093	0.2
F: iCC - OS <= 365 days vs. OS > 365 days	CD5	t.test	No flag	5.389	1.17	5.086	1.024	0.22	0.095	0.2
F: iCC - OS <= 365 days vs. OS > 365 days	TRAIL-	t.test	No flag	8.165	0.6	8.174	0.518	-0.18	0.1	0.21
F: iCC - OS <= 365 days vs. OS > 365 days	CD40	t.test	No flag	10.166	0.74	9.936	0.678	0.2	0.14	0.27
F: iCC - OS <= 365 days vs. OS > 365 days	CXCL12	t.test	No flag	0.605	1.28	0.585	0.991	0.17	0.15	0.28
F: iCC - OS <= 365 days vs. OS > 365 days	CRTAM	t.test	No flag	5.853	1.02	5.646	0.892	0.16	0.17	0.31
F: iCC - OS <= 365 days vs. OS > 365 days	CXCL9	t.test	No flag	7.8	1.38	7.49	1.092	0.21	0.19	0.34
F: iCC - OS <= 365 days vs. OS > 365 days	IFN-gamma	t.test	No flag	6.649	1.64	6.343	1.349	0.28	0.2	0.35
F: iCC - OS <= 365 days vs. OS > 365 days	MMP12	t.test	No flag	8.444	1.93	7.945	1.391	0.28	0.2	0.35
F: iCC - OS <= 365 days vs. OS > 365 days	GZMA	t.test	No flag	6.546	0.88	6.34	0.704	0.14	0.22	0.37
F: iCC - OS <= 365 days vs. OS > 365 days	CSF-1	t.test	No flag	9.524	0.98	9.357	0.529	0.14	0.25	0.4
F: iCC - OS <= 365 days vs. OS > 365 days	CD40-L	t.test	No flag	7.275	2.22	7.078	2.67	0.29	0.27	0.42
F: iCC - OS <= 365 days vs. OS > 365 days	LAP-TGF-beta-1	t.test	No flag	9.853	0.97	9.616	0.627	0.15	0.28	0.44
F: iCC - OS <= 365 days vs. OS > 365 days	PDCD1	t.test	No flag	5.092	0.86	4.861	0.865	0.11	0.28	0.44
F: iCC - OS <= 365 days vs. OS > 365 days	TNFRSF21	t.test	No flag	7.597	0.43	7.33	0.459	0.095	0.28	0.44
F: iCC - OS <= 365 days vs. OS > 365 days	MCP-1	t.test	No flag	11.762	1.19	11.506	0.801	0.15	0.32	0.47
F: iCC - OS <= 365 days vs. OS > 365 days	LAG3	t.test	No flag	3.126	1.94	2.952	1.261	0.18	0.33	0.48
F: iCC - OS <= 365 days vs. OS > 365 days	DCN	t.test	No flag	4.522	0.35	4.392	0.282	0.069	0.33	0.48
F: iCC - OS <= 365 days vs. OS > 365 days	CD83	t.test	No flag	2.795	0.73	2.68	0.593	0.07	0.33	0.49
F: iCC - OS <= 365 days vs. OS > 365 days	IL-8	t.test	No flag	10.152	3.06	9.42	2.84	0.28	0.34	0.49
F: iCC - OS <= 365 days vs. OS > 365 days	ADA	t.test	No flag	5.18	0.85	4.952	0.809	0.097	0.34	0.49
F: iCC - OS <= 365 days vs. OS > 365 days	FASLG	t.test	No flag	5.853	1.16	5.931	0.954	-0.13	0.35	0.51
F: iCC - OS <= 365 days vs. OS > 365 days	CXCL10	t.test	No flag	10.053	1.24	9.708	1.19	0.15	0.38	0.53
F: iCC - OS <= 365 days vs. OS > 365 days	CD70	t.test	No flag	4.271	1.03	4.18	0.578	0.089	0.38	0.53
F: iCC - OS <= 365 days vs. OS > 365 days	MMP7	t.test	No flag	11.894	0.45	11.866	0.41	-0.11	0.41	0.56
F: iCC - OS <= 365 days vs. OS > 365 days	CCL4	t.test	No flag	7.275	0.97	7.039	0.765	0.1	0.44	0.58
F: iCC - OS <= 365 days vs. OS > 365 days	TIE2	t.test	No flag	7.724	0.57	7.583	0.442	0.071	0.47	0.61
F: iCC - OS <= 365 days vs. OS > 365 days	KIR3DL1	t.test	No flag	1.728	1.39	1.396	1.621	0.13	0.49	0.64
F: iCC - OS <= 365 days vs. OS > 365 days	EGF	t.test	No flag	9.136	2.55	8.957	2.914	0.18	0.55	0.68
F: iCC - OS <= 365 days vs. OS > 365 days	CD8A	t.test	No flag	9.408	1.03	9.089	0.894	0.097	0.55	0.68
F: iCC - OS <= 365 days vs. OS > 365 days	GZMB	t.test	No flag	4.28	1.42	4.177	0.777	0.086	0.55	0.68
F: iCC - OS <= 365 days vs. OS > 365 days	CD244	t.test	No flag	6.39	0.68	6.307	0.661	0.058	0.55	0.68
F: iCC - OS <= 365 days vs. OS > 365 days	IL-5	t.test	No flag	0.704	1.18	0.649	1.045	0.096	0.58	0.7
F: iCC - OS <= 365 days vs. OS > 365 days	ICOSLG	t.test	No flag	5.93	0.46	5.921	0.378	-0.051	0.58	0.71
F: iCC - OS <= 365 days vs. OS > 365 days	VEGFR-2	t.test	No flag	7.79	0.46	7.757	0.389	-0.044	0.6	0.71
F: iCC - OS <= 365 days vs. OS > 365 days	CX3CL1	t.test	No flag	6.994	2.17	6.885	1.173	0.11	0.6	0.72
F: iCC - OS <= 365 days vs. OS > 365 days	PDGF-subunit-B	t.test	No flag	9.724	0.27	9.756	0.186	-0.058	0.6	0.72
F: iCC - OS <= 365 days vs. OS > 365 days	IL-12	t.test	No flag	6.8	1.25	6.626	1.069	0.079	0.61	0.72
F: iCC - OS <= 365 days vs. OS > 365 days	IL-33	t.test	Flag	0.615	0.79	0.607	0.497	0.039	0.65	0.75
F: iCC - OS <= 365 days vs. OS > 365 days	Gal-1	t.test	No flag	6.953	0.35	6.84	0.345	0.031	0.67	0.77
F: iCC - OS <= 365 days vs. OS > 365 days	CCL17	t.test	No flag	9.533	1.84	9.385	1.073	0.069	0.71	0.8
F: iCC - OS <= 365 days vs. OS > 365 days	TWEAK	t.test	No flag	8.124	0.7	8.104	0.471	0.039	0.73	0.81
F: iCC - OS <= 365 days vs. OS > 365 days	MIC-A/B	t.test	No flag	5.558	1.29	5.338	1.112	0.08	0.75	0.83
F: iCC - OS <= 365 days vs. OS > 365 days	CAIX	t.test	No flag	7.412	2.34	7.283	2.987	-0.081	0.76	0.83
F: iCC - OS <= 365 days vs. OS > 365 days	IL-4	t.test	No flag	0.339	0.95	0.442	1.256	0.035	0.79	0.85
F: iCC - OS <= 365 days vs. OS > 365 days	ANGPT1	t.test	No flag	10.056	0.97	10.002	0.68	-0.036	0.85	0.9
F: iCC - OS <= 365 days vs. OS > 365 days	CXCL5	t.test	No flag	11.633	1.43	11.514	1.142	0.029	0.88	0.92
F: iCC - OS <= 365 days vs. OS > 365 days	MCP-2	t.test	No flag	7.901	0.86	7.941	0.624	-0.018	0.88	0.92
F: iCC - OS <= 365 days vs. OS > 365 days	MCP-4	t.test	No flag	9.498	1.11	9.447	0.696	-0.018	0.9	0.93
F: iCC - OS <= 365 days vs. OS > 365 days	HO-1	t.test	No flag	10.552	1.54	10.496	1.123	0.001	1	1
G: eCC - OS <= 365 days vs. OS > 365 days	MUC-16	t.test	No flag	3.773	2.19	1.684	1.531	1.6	5.2e-05	0.00075
G: eCC - OS <= 365 days vs. OS > 365 days	IL-15	t.test	No flag	5.131	0.46	4.72	0.469	0.41	6.5e-05	0.00085
G: eCC - OS <= 365 days vs. OS > 365 days	FGF2	t.test	No flag	0.636	1.84	-0.045	0.731	0.75	0.0013	0.0095
G: eCC - OS <= 365 days vs. OS > 365 days	PD-L2	t.test	No flag	2.457	1.41	1.911	0.532	0.54	0.0017	0.012
G: eCC - OS <= 365 days vs. OS > 365 days	CA199	t.test	NA	8.04	6.29	5.781	3.343	2.5	0.0019	0.013
G: eCC - OS <= 365 days vs. OS > 365 days	CSF-1	t.test	No flag	9.598	0.94	9.405	0.358	0.3	0.0054	0.028
G: eCC - OS <= 365 days vs. OS > 365 days	ANGPT2	t.test	No flag	6.012	0.93	5.497	0.515	0.43	0.0059	0.03
G: eCC - OS <= 365 days vs. OS > 365 days	CXCL12	t.test	No flag	0.6	1.17	0.487	0.473	0.42	0.006	0.03
G: eCC - OS <= 365 days vs. OS > 365 days	CCL23	t.test	No flag	10.47	1.29	10.05	0.947	0.47	0.0096	0.042
G: eCC - OS <= 365 days vs. OS > 365 days	IL-6	t.test	No flag	4.136	2.37	2.705	1.862	1	0.011	0.047
G: eCC - OS <= 365 days vs. OS > 365 days	MMP12	t.test	No flag	7.856	1.43	7.551	0.896	0.48	0.012	0.049
G: eCC - OS <= 365 days vs. OS > 365 days	PGF	t.test	No flag	7.585	1.69	7.198	0.695	0.46	0.014	0.053
G: eCC - OS <= 365 days vs. OS > 365 days	VEGFA	t.test	No flag	9.134	1.15	8.57	0.831	0.44	0.014	0.054
G: eCC - OS <= 365 days vs. OS > 365 days	CCL20	t.test	No flag	8.627	1.86	7.569	1.654	0.88	0.015	0.057
G: eCC - OS <= 365 days vs. OS > 365 days	ARG1	t.test	No flag	3.585	1.34	3.055	1.23	0.52	0.016	0.06
G: eCC - OS <= 365 days vs. OS > 365 days	KLRD1	t.test	No flag	6.689	1.15	6.319	0.946	0.37	0.017	0.062
G: eCC - OS <= 365 days vs. OS > 365 days	PTN	t.test	No flag	2.483	1	1.964	2.268	0.63	0.018	0.064
G: eCC - OS <= 365 days vs. OS > 365 days	LAG3	t.test	No flag	3.281	1.95	2.845	0.869	0.63	0.018	0.065
G: eCC - OS <= 365 days vs. OS > 365 days	TIE2	t.test	No flag	7.693	0.61	7.436	0.399	0.19	0.019	0.067
G: eCC - OS <= 365 days vs. OS > 365 days	CASP-8	t.test	No flag	5.429	1.52	4.639	1.284	0.64	0.02	0.068
G: eCC - OS <= 365 days vs. OS > 365 days	CCL19	t.test	No flag	10.248	2.36	9.619	1.181	0.71	0.02	0.069
G: eCC - OS <= 365 days vs. OS > 365 days	FASLG	t.test	No flag	6.091	1.13	5.814	0.562	0.34	0.024	0.078
G: eCC - OS <= 365 days vs. OS > 365 days	TNFRSF4	t.test	No flag	5.708	1.04	5.254	0.455	0.34	0.025	0.079
G: eCC - OS <= 365 days vs. OS > 365 days	TNFRSF12A	t.test	No flag	6.045	1.18	5.37	0.872	0.4	0.025	0.08
G: eCC - OS <= 365 days vs. OS > 365 days	TNF	t.test	No flag	3.506	1.27	3.008	1.157	0.46	0.031	0.092
G: eCC - OS <= 365 days vs. OS > 365 days	HO-1	t.test	No flag	11.005	1.64	10.581	0.843	0.46	0.041	0.12
G: eCC - OS <= 365 days vs. OS > 365 days	PD-L1	t.test	No flag	6.007	0.74	5.668	0.646	0.23	0.043	0.12
G: eCC - OS <= 365 days vs. OS > 365 days	IL-4	t.test	No flag	0.45	0.92	0.168	0.777	0.35	0.046	0.13
G: eCC - OS <= 365 days vs. OS > 365 days	ANGPT1	t.test	No flag	10.032	1.69	10.319	0.367	-0.5	0.047	0.13
G: eCC - OS <= 365 days vs. OS > 365 days	TNFRSF21	t.test	No flag	7.453	0.51	7.292	0.295	0.11	0.049	0.13
G: eCC - OS <= 365 days vs. OS > 365 days	CXCL1	t.test	No flag	9.162	0.68	8.808	0.819	0.35	0.057	0.14
G: eCC - OS <= 365 days vs. OS > 365 days	MIC-A/B	t.test	No flag	5.534	1.22	5.276	1.273	0.65	0.062	0.15
G: eCC - OS <= 365 days vs. OS > 365 days	Gal-9	t.test	No flag	8.491	0.64	8.171	0.438	0.15	0.078	0.18
G: eCC - OS <= 365 days vs. OS > 365 days	CX3CL1	t.test	No flag	6.75	2.88	6.871	0.703	-0.6	0.08	0.18
G: eCC - OS <= 365 days vs. OS > 365 days	MMP7	t.test	No flag	11.831	0.72	11.846	0.274	-0.25	0.089	0.2
G: eCC - OS <= 365 days vs. OS > 365 days	KIR3DL1	t.test	No flag	1.622	1.59	1.291	1.49	0.48	0.1	0.21
G: eCC - OS <= 365 days vs. OS > 365 days	NOS3	t.test	No flag	2.159	0.76	2.041	0.834	0.24	0.1	0.21
G: eCC - OS <= 365 days vs. OS > 365 days	CCL17	t.test	No flag	9.717	1.63	10.078	1	-0.38	0.1	0.22
G: eCC - OS <= 365 days vs. OS > 365 days	EGF	t.test	No flag	9.706	2.48	10.25	1.15	-0.67	0.11	0.22
G: eCC - OS <= 365 days vs. OS > 365 days	CAIX	t.test	No flag	5.798	1.24	5.464	0.884	0.33	0.11	0.23
G: eCC - OS <= 365 days vs. OS > 365 days	DCN	t.test	No flag	4.468	0.37	4.38	0.28	0.092	0.11	0.23
G: eCC - OS <= 365 days vs. OS > 365 days	CXCL13	t.test	No flag	8.777	0.84	8.448	0.581	0.26	0.12	0.25
G: eCC - OS <= 365 days vs. OS > 365 days	GZMB	t.test	No flag	4.296	1.53	4.601	1.254	-0.39	0.12	0.25
G: eCC - OS <= 365 days vs. OS > 365 days	IL-18	t.test	No flag	9.219	0.99	8.824	0.869	0.25	0.13	0.26
G: eCC - OS <= 365 days vs. OS > 365 days	CRTAM	t.test	No flag	5.768	0.95	5.706	0.873	0.2	0.14	0.27
G: eCC - OS <= 365 days vs. OS > 365 days	CCL4	t.test	No flag	7.491	1.53	7.635	0.942	-0.3	0.14	0.27
G: eCC - OS <= 365 days vs. OS > 365 days	ADGRG1	t.test	No flag	2.517	1.54	2.137	0.928	0.33	0.14	0.28
G: eCC - OS <= 365 days vs. OS > 365 days	CD28	t.test	No flag	0.628	0.64	0.583	0.297	0.13	0.16	0.3
G: eCC - OS <= 365 days vs. OS > 365 days	IL-33	t.test	Flag	0.634	0.82	0.684	0.388	-0.17	0.16	0.3
G: eCC - OS <= 365 days vs. OS > 365 days	CXCL11	t.test	No flag	8.428	1.77	8.374	1.227	0.33	0.19	0.34
G: eCC - OS <= 365 days vs. OS > 365 days	CD27	t.test	No flag	8.264	0.76	8.107	0.528	0.13	0.19	0.34
G: eCC - OS <= 365 days vs. OS > 365 days	CXCL9	t.test	No flag	7.889	1.3	7.349	1.5	0.29	0.2	0.35
G: eCC - OS <= 365 days vs. OS > 365 days	CD40	t.test	No flag	10.26	0.69	10.042	0.676	0.15	0.21	0.35
G: eCC - OS <= 365 days vs. OS > 365 days	IL-10	t.test	No flag	3.697	0.76	3.158	0.723	0.34	0.22	0.37
G: eCC - OS <= 365 days vs. OS > 365 days	IL-12RB1	t.test	No flag	2.156	0.74	1.945	0.672	0.14	0.23	0.38
G: eCC - OS <= 365 days vs. OS > 365 days	TRAIL-	t.test	No flag	8.104	0.53	8.351	0.437	-0.1	0.24	0.39
G: eCC - OS <= 365 days vs. OS > 365 days	CD40-L	t.test	No flag	7.643	1.84	7.951	1.458	-0.45	0.24	0.39
G: eCC - OS <= 365 days vs. OS > 365 days	CD5	t.test	No flag	5.465	0.96	5.325	0.678	0.15	0.25	0.4
G: eCC - OS <= 365 days vs. OS > 365 days	IL-8	t.test	No flag	8.198	1.93	7.525	1.679	0.36	0.26	0.41
G: eCC - OS <= 365 days vs. OS > 365 days	IL-12	t.test	No flag	6.853	0.87	6.676	1.114	0.19	0.29	0.44
G: eCC - OS <= 365 days vs. OS > 365 days	TWEAK	t.test	No flag	8.097	0.55	8.306	0.583	-0.097	0.3	0.46
G: eCC - OS <= 365 days vs. OS > 365 days	NCR1	t.test	No flag	3.868	0.71	3.805	0.453	0.1	0.32	0.48
G: eCC - OS <= 365 days vs. OS > 365 days	PDGF-subunit-B	t.test	No flag	9.781	0.34	9.744	0.183	0.089	0.33	0.48
G: eCC - OS <= 365 days vs. OS > 365 days	ICOSLG	t.test	No flag	5.959	0.45	6.097	0.423	-0.086	0.38	0.53
G: eCC - OS <= 365 days vs. OS > 365 days	CD8A	t.test	No flag	9.195	0.98	9.029	0.706	0.13	0.4	0.55
G: eCC - OS <= 365 days vs. OS > 365 days	GZMA	t.test	No flag	6.65	0.77	6.489	0.665	0.098	0.43	0.57
G: eCC - OS <= 365 days vs. OS > 365 days	CD83	t.test	No flag	2.978	0.65	3.139	0.46	-0.075	0.43	0.57
G: eCC - OS <= 365 days vs. OS > 365 days	HGF	t.test	No flag	9.564	0.85	9.489	0.551	0.12	0.45	0.59
G: eCC - OS <= 365 days vs. OS > 365 days	TNFRSF9	t.test	No flag	6.491	0.64	6.447	0.558	0.082	0.45	0.59
G: eCC - OS <= 365 days vs. OS > 365 days	CD244	t.test	No flag	6.509	0.6	6.368	0.464	0.057	0.49	0.64
G: eCC - OS <= 365 days vs. OS > 365 days	TNFSF14	t.test	No flag	6.81	1.47	6.493	1.206	0.14	0.5	0.64
G: eCC - OS <= 365 days vs. OS > 365 days	ADA	t.test	No flag	5.003	0.87	4.994	0.528	0.069	0.52	0.66
G: eCC - OS <= 365 days vs. OS > 365 days	Gal-1	t.test	No flag	7.029	0.47	6.972	0.318	-0.047	0.52	0.66
G: eCC - OS <= 365 days vs. OS > 365 days	VEGFR-2	t.test	No flag	8.051	0.44	7.941	0.289	0.035	0.55	0.68
G: eCC - OS <= 365 days vs. OS > 365 days	MCP-3	t.test	No flag	2.998	1.44	2.805	0.88	0.12	0.56	0.69
G: eCC - OS <= 365 days vs. OS > 365 days	CXCL10	t.test	No flag	9.788	1.89	9.748	1.177	0.13	0.59	0.71
G: eCC - OS <= 365 days vs. OS > 365 days	CD4	t.test	No flag	4.318	0.56	4.43	0.546	-0.048	0.61	0.72
G: eCC - OS <= 365 days vs. OS > 365 days	CXCL5	t.test	No flag	11.574	1.3	11.32	1.259	0.12	0.62	0.73
G: eCC - OS <= 365 days vs. OS > 365 days	LAMP3	t.test	No flag	5.212	1.18	5.022	0.824	0.076	0.64	0.75
G: eCC - OS <= 365 days vs. OS > 365 days	GZMH	t.test	No flag	4.464	1.47	4.447	1.747	0.091	0.68	0.78
G: eCC - OS <= 365 days vs. OS > 365 days	CD70	t.test	No flag	4.346	1.05	4.413	0.645	-0.052	0.71	0.8
G: eCC - OS <= 365 days vs. OS > 365 days	MCP-2	t.test	No flag	8.157	0.74	8.182	0.848	0.049	0.73	0.81
G: eCC - OS <= 365 days vs. OS > 365 days	IL-7	t.test	No flag	5.696	1.12	5.767	0.849	0.055	0.75	0.83
G: eCC - OS <= 365 days vs. OS > 365 days	IFN-gamma	t.test	No flag	6.93	1.74	6.787	1.91	0.07	0.82	0.87
G: eCC - OS <= 365 days vs. OS > 365 days	LAP-TGF-beta-1	t.test	No flag	9.752	0.93	9.567	0.62	0.017	0.91	0.94
G: eCC - OS <= 365 days vs. OS > 365 days	MCP-4	t.test	No flag	9.772	1.22	9.646	0.822	-0.014	0.93	0.96
G: eCC - OS <= 365 days vs. OS > 365 days	PDCD1	t.test	No flag	5.068	0.53	5.121	0.504	0.0088	0.94	0.96
G: eCC - OS <= 365 days vs. OS > 365 days	MCP-1	t.test	No flag	11.347	0.85	11.205	0.64	0.0086	0.95	0.97
G: eCC - OS <= 365 days vs. OS > 365 days	CCL3	t.test	No flag	6.901	1.42	6.822	1.097	-0.01	0.96	0.97
G: eCC - OS <= 365 days vs. OS > 365 days	IL-5	t.test	No flag	0.706	0.54	0.625	0.786	-0.0051	0.98	0.99
H: GBC - OS <= 365 days vs. OS > 365 days	ADGRG1	wilcox.test	No flag	2.779	1.93	1.932	0.76	0.93	0.0018	0.013
H: GBC - OS <= 365 days vs. OS > 365 days	CD28	t.test	No flag	0.626	0.51	0.319	0.35	0.26	0.0023	0.015
H: GBC - OS <= 365 days vs. OS > 365 days	CCL20	t.test	No flag	8.983	1.74	7.394	2.263	1.1	0.0033	0.02
H: GBC - OS <= 365 days vs. OS > 365 days	CD4	t.test	No flag	4.474	0.58	4.186	0.456	0.27	0.0038	0.021
H: GBC - OS <= 365 days vs. OS > 365 days	NCR1	t.test	No flag	3.812	0.62	3.529	0.676	0.4	0.0058	0.03
H: GBC - OS <= 365 days vs. OS > 365 days	IL-12RB1	t.test	No flag	2.244	0.67	1.859	0.588	0.33	0.006	0.03
H: GBC - OS <= 365 days vs. OS > 365 days	NOS3	t.test	No flag	2.358	0.95	1.921	0.582	0.42	0.0079	0.037
H: GBC - OS <= 365 days vs. OS > 365 days	CD40	t.test	No flag	10.339	0.56	10.001	0.578	0.35	0.0087	0.039
H: GBC - OS <= 365 days vs. OS > 365 days	HGF	wilcox.test	No flag	9.756	0.9	9.401	0.513	0.45	0.011	0.046
H: GBC - OS <= 365 days vs. OS > 365 days	PD-L1	t.test	No flag	6.017	0.77	5.698	0.752	0.35	0.011	0.047
H: GBC - OS <= 365 days vs. OS > 365 days	IFN-gamma	wilcox.test	No flag	7.338	1.15	6.561	0.996	0.41	0.012	0.048
H: GBC - OS <= 365 days vs. OS > 365 days	CXCL11	t.test	No flag	9.212	1.26	8.497	0.688	0.58	0.012	0.05
H: GBC - OS <= 365 days vs. OS > 365 days	IL-10	wilcox.test	No flag	4.02	1.13	3.568	0.803	0.66	0.015	0.057
H: GBC - OS <= 365 days vs. OS > 365 days	Gal-9	t.test	No flag	8.425	0.54	8.127	0.593	0.25	0.017	0.061
H: GBC - OS <= 365 days vs. OS > 365 days	CXCL13	wilcox.test	No flag	9.215	0.96	8.563	1.073	0.4	0.026	0.082
H: GBC - OS <= 365 days vs. OS > 365 days	ADA	wilcox.test	No flag	5.259	0.74	4.92	0.407	0.33	0.032	0.094
H: GBC - OS <= 365 days vs. OS > 365 days	IL-18	t.test	No flag	9.311	1.24	8.869	1.415	0.56	0.038	0.11
H: GBC - OS <= 365 days vs. OS > 365 days	CCL23	t.test	No flag	10.688	0.79	10.198	1.397	0.45	0.049	0.13
H: GBC - OS <= 365 days vs. OS > 365 days	PDCD1	wilcox.test	No flag	5.121	0.8	4.862	0.428	0.3	0.05	0.13
H: GBC - OS <= 365 days vs. OS > 365 days	KLRD1	t.test	No flag	6.753	0.81	6.529	0.8	0.38	0.051	0.13
H: GBC - OS <= 365 days vs. OS > 365 days	LAP-TGF-beta-1	t.test	No flag	9.763	0.94	9.501	0.584	0.28	0.052	0.13
H: GBC - OS <= 365 days vs. OS > 365 days	IL-6	t.test	No flag	4.237	1.84	2.836	2.204	0.87	0.054	0.14
H: GBC - OS <= 365 days vs. OS > 365 days	IL-15	t.test	No flag	5.011	0.59	4.886	0.582	0.23	0.056	0.14
H: GBC - OS <= 365 days vs. OS > 365 days	IL-5	wilcox.test	Flag	0.634	0.85	0.41	0.456	0.53	0.067	0.16
H: GBC - OS <= 365 days vs. OS > 365 days	TNFSF14	wilcox.test	No flag	6.518	1.43	5.801	1.449	0.38	0.078	0.18
H: GBC - OS <= 365 days vs. OS > 365 days	CD244	t.test	No flag	6.553	0.39	6.39	0.454	0.18	0.082	0.19
H: GBC - OS <= 365 days vs. OS > 365 days	CASP-8	wilcox.test	No flag	4.736	2.02	4.148	1.6	0.42	0.083	0.19
H: GBC - OS <= 365 days vs. OS > 365 days	IL-8	t.test	No flag	8.2	2.06	7.228	1.6	0.56	0.092	0.2
H: GBC - OS <= 365 days vs. OS > 365 days	TNFRSF12A	t.test	No flag	5.887	0.84	5.402	1.039	0.3	0.092	0.2
H: GBC - OS <= 365 days vs. OS > 365 days	DCN	wilcox.test	No flag	4.43	0.37	4.405	0.279	0.14	0.11	0.22
H: GBC - OS <= 365 days vs. OS > 365 days	CD27	t.test	No flag	8.513	0.51	8.142	0.704	0.19	0.11	0.23
H: GBC - OS <= 365 days vs. OS > 365 days	ANGPT2	t.test	No flag	6.052	0.7	5.986	0.69	0.22	0.13	0.27
H: GBC - OS <= 365 days vs. OS > 365 days	PD-L2	wilcox.test	No flag	2.274	1.3	2.024	1.724	0.37	0.14	0.27
H: GBC - OS <= 365 days vs. OS > 365 days	GZMA	t.test	No flag	6.851	0.69	6.749	0.746	0.22	0.14	0.27
H: GBC - OS <= 365 days vs. OS > 365 days	CSF-1	wilcox.test	No flag	9.62	0.64	9.452	1.083	0.13	0.15	0.28
H: GBC - OS <= 365 days vs. OS > 365 days	TNFRSF9	wilcox.test	No flag	6.71	0.81	6.571	0.703	0.23	0.15	0.29
H: GBC - OS <= 365 days vs. OS > 365 days	PGF	wilcox.test	No flag	7.512	1.55	7.118	1.821	0.21	0.15	0.29
H: GBC - OS <= 365 days vs. OS > 365 days	VEGFA	t.test	No flag	9.388	1.36	8.773	1.169	0.32	0.17	0.31
H: GBC - OS <= 365 days vs. OS > 365 days	CD40-L	wilcox.test	No flag	7.907	2.49	6.981	2.911	0.5	0.2	0.35
H: GBC - OS <= 365 days vs. OS > 365 days	Gal-1	wilcox.test	No flag	6.98	0.31	6.848	0.305	0.074	0.2	0.35
H: GBC - OS <= 365 days vs. OS > 365 days	KIR3DL1	t.test	No flag	1.468	1.29	1.947	1.083	-0.28	0.2	0.35
H: GBC - OS <= 365 days vs. OS > 365 days	MIC-A/B	wilcox.test	No flag	5.619	1.07	5.313	1.149	0.39	0.21	0.36
H: GBC - OS <= 365 days vs. OS > 365 days	CXCL9	t.test	No flag	7.982	1.14	7.727	1.457	0.3	0.22	0.37
H: GBC - OS <= 365 days vs. OS > 365 days	CX3CL1	wilcox.test	No flag	6.825	2.84	6.624	2.426	0.27	0.22	0.37
H: GBC - OS <= 365 days vs. OS > 365 days	IL-7	t.test	No flag	5.973	1.25	5.678	0.992	0.26	0.22	0.37
H: GBC - OS <= 365 days vs. OS > 365 days	CCL3	wilcox.test	No flag	6.568	0.82	6.14	1.157	0.13	0.22	0.37
H: GBC - OS <= 365 days vs. OS > 365 days	TIE2	t.test	No flag	7.652	0.43	7.498	0.669	0.12	0.22	0.37
H: GBC - OS <= 365 days vs. OS > 365 days	LAG3	wilcox.test	No flag	3.294	1.71	2.82	2.033	0.26	0.23	0.38
H: GBC - OS <= 365 days vs. OS > 365 days	CXCL1	t.test	No flag	9.326	1.06	9.087	0.514	0.21	0.23	0.38
H: GBC - OS <= 365 days vs. OS > 365 days	GZMB	wilcox.test	No flag	4.61	1.77	4.129	0.903	0.3	0.25	0.4
H: GBC - OS <= 365 days vs. OS > 365 days	TNFRSF21	t.test	No flag	7.354	0.39	7.32	0.424	0.086	0.25	0.4
H: GBC - OS <= 365 days vs. OS > 365 days	PTN	wilcox.test	No flag	2.104	1.2	1.827	1.377	0.35	0.26	0.41
H: GBC - OS <= 365 days vs. OS > 365 days	CRTAM	t.test	No flag	6.073	0.68	5.973	0.674	0.18	0.26	0.41
H: GBC - OS <= 365 days vs. OS > 365 days	CD83	t.test	No flag	2.874	0.76	2.84	0.482	0.12	0.26	0.41
H: GBC - OS <= 365 days vs. OS > 365 days	MMP12	wilcox.test	No flag	8.219	1.53	7.814	0.949	0.31	0.27	0.42
H: GBC - OS <= 365 days vs. OS > 365 days	ANGPT1	wilcox.test	No flag	10.149	1.23	9.818	1.353	0.18	0.29	0.44
H: GBC - OS <= 365 days vs. OS > 365 days	TNF	t.test	No flag	3.54	0.92	3.141	1.654	0.26	0.3	0.46
H: GBC - OS <= 365 days vs. OS > 365 days	IL-4	t.test	Flag	0.382	0.9	0.121	1.287	0.22	0.3	0.46
H: GBC - OS <= 365 days vs. OS > 365 days	EGF	wilcox.test	No flag	9.552	2.64	9.285	3.319	0.57	0.31	0.46
H: GBC - OS <= 365 days vs. OS > 365 days	MUC-16	t.test	No flag	4.235	2.23	3.624	2.455	0.49	0.31	0.47
H: GBC - OS <= 365 days vs. OS > 365 days	TNFRSF4	wilcox.test	No flag	5.71	0.94	5.226	1.508	0.22	0.31	0.47
H: GBC - OS <= 365 days vs. OS > 365 days	LAMP3	t.test	No flag	4.801	1.12	4.81	0.729	0.14	0.36	0.51
H: GBC - OS <= 365 days vs. OS > 365 days	CCL19	t.test	No flag	10.594	1.44	10.055	2.454	0.28	0.37	0.52
H: GBC - OS <= 365 days vs. OS > 365 days	ICOSLG	wilcox.test	No flag	6.005	0.37	6.02	0.447	0.17	0.38	0.53
H: GBC - OS <= 365 days vs. OS > 365 days	CAIX	wilcox.test	No flag	5.713	1.7	5.46	1.096	0.17	0.38	0.53
H: GBC - OS <= 365 days vs. OS > 365 days	CD5	wilcox.test	No flag	5.492	0.93	5.176	1.396	0.092	0.4	0.55
H: GBC - OS <= 365 days vs. OS > 365 days	MCP-3	t.test	No flag	3.199	1.15	2.982	1.265	0.22	0.41	0.56
H: GBC - OS <= 365 days vs. OS > 365 days	MCP-4	t.test	No flag	9.769	1.12	9.812	1.021	-0.19	0.41	0.56
H: GBC - OS <= 365 days vs. OS > 365 days	GZMH	t.test	No flag	4.814	1.29	4.447	1.797	0.21	0.42	0.57
H: GBC - OS <= 365 days vs. OS > 365 days	MMP7	wilcox.test	No flag	11.901	0.74	11.749	0.567	0.023	0.44	0.58
H: GBC - OS <= 365 days vs. OS > 365 days	MCP-2	t.test	No flag	7.974	1.02	7.902	0.834	0.1	0.47	0.61
H: GBC - OS <= 365 days vs. OS > 365 days	CD70	t.test	No flag	4.666	1.28	4.484	0.79	0.12	0.5	0.64
H: GBC - OS <= 365 days vs. OS > 365 days	CD8A	wilcox.test	No flag	9.191	0.66	9.356	1.254	-0.17	0.51	0.64
H: GBC - OS <= 365 days vs. OS > 365 days	IL-33	wilcox.test	Flag	0.626	1.1	0.433	1.333	0.12	0.53	0.66
H: GBC - OS <= 365 days vs. OS > 365 days	CXCL10	t.test	No flag	10.029	1.18	9.765	1.213	0.13	0.58	0.71
H: GBC - OS <= 365 days vs. OS > 365 days	PDGF-subunit-B	wilcox.test	No flag	9.738	0.37	9.713	0.325	0.075	0.58	0.71
H: GBC - OS <= 365 days vs. OS > 365 days	FGF2	t.test	No flag	0.203	1.15	0.078	1.086	0.12	0.59	0.71
H: GBC - OS <= 365 days vs. OS > 365 days	CXCL5	wilcox.test	No flag	11.67	1.27	11.348	0.816	0.16	0.7	0.79
H: GBC - OS <= 365 days vs. OS > 365 days	FASLG	t.test	No flag	5.954	1.05	5.968	1.138	-0.075	0.72	0.81
H: GBC - OS <= 365 days vs. OS > 365 days	HO-1	wilcox.test	No flag	11.002	0.98	10.921	1.617	0.079	0.73	0.81
H: GBC - OS <= 365 days vs. OS > 365 days	TRAIL-	wilcox.test	No flag	8.211	0.49	8.267	0.528	-0.069	0.73	0.81
H: GBC - OS <= 365 days vs. OS > 365 days	VEGFR-2	t.test	No flag	7.99	0.4	7.983	0.388	0.023	0.76	0.83
H: GBC - OS <= 365 days vs. OS > 365 days	CA199	wilcox.test	NA	6.728	6.28	6.939	3.613	0.28	0.79	0.85
H: GBC - OS <= 365 days vs. OS > 365 days	IL-12	t.test	No flag	6.795	1.29	6.925	1.537	-0.054	0.82	0.87
H: GBC - OS <= 365 days vs. OS > 365 days	MCP-1	t.test	No flag	11.299	0.77	11.256	0.251	0.018	0.85	0.91
H: GBC - OS <= 365 days vs. OS > 365 days	TWEAK	wilcox.test	No flag	8.21	0.61	8.212	0.607	0.017	0.91	0.94
H: GBC - OS <= 365 days vs. OS > 365 days	CXCL12	wilcox.test	No flag	0.835	0.96	0.815	1.195	-0.016	0.92	0.95
H: GBC - OS <= 365 days vs. OS > 365 days	ARG1	t.test	No flag	3.28	1.85	3.422	1.653	0.022	0.94	0.96
H: GBC - OS <= 365 days vs. OS > 365 days	CCL17	t.test	No flag	9.85	1.48	9.727	1.25	0.021	0.94	0.96
H: GBC - OS <= 365 days vs. OS > 365 days	CCL4	t.test	No flag	7.27	0.66	7.221	0.665	0.0049	0.98	0.98

## Sheet: Table S5
Table S5: Performance of biomarkers in all cohorts at descriminating between long and short-term survivors. Abbreviations: 1L Disc., first-line discovery cohort; 1L val., first-line validation cohort; 2L, second-line cohort; CRP, C-reactive-protein; NLR, neutrophil/lymphocyte ratio; SII, systemic inflammation index.
Cohort and comparison	Marker	AUC	CIlow	CIhigh	Threshold	Sensitivity	Specificity
1L Disc. OS<=12m vs. OS>12m	IL-6	0.769353	0.700558	0.838148	3.0477	0.719512	0.747826
1L Disc. OS<=12m vs. OS>12m	CSF-1	0.767975	0.701933	0.834016	9.32872	0.658537	0.791304
1L Disc. OS<=12m vs. OS>12m	CCL23	0.75334	0.684562	0.822118	10.3649	0.829268	0.608696
1L Disc. OS<=12m vs. OS>12m	IL-15	0.75281	0.683434	0.822186	4.78136	0.743902	0.73913
1L Disc. OS<=12m vs. OS>12m	SII	0.750436	0.669171	0.8317	1708.9	0.875	0.536585
1L Disc. OS<=12m vs. OS>12m	HGF	0.736055	0.667354	0.804756	10.1195	0.926829	0.443478
1L Disc. OS<=12m vs. OS>12m	VEGFA	0.73298	0.662794	0.803166	8.78829	0.768293	0.6
1L Disc. OS<=12m vs. OS>12m	MUC-16	0.727519	0.654264	0.800773	3.34219	0.707317	0.721739
1L Disc. OS<=12m vs. OS>12m	PD-L2	0.725027	0.655525	0.794528	2.06498	0.878049	0.495652
1L Disc. OS<=12m vs. OS>12m	PD-L1	0.7228	0.649575	0.796024	5.59216	0.585366	0.8
1L Disc. OS<=12m vs. OS>12m	NLR	0.71973	0.634949	0.804511	4.37088	0.732143	0.658537
1L Disc. OS<=12m vs. OS>12m	TNFRSF21	0.718134	0.645637	0.79063	7.29254	0.658537	0.713043
1L Disc. OS<=12m vs. OS>12m	PGF	0.717179	0.644447	0.789912	7.08566	0.585366	0.791304
1L Disc. OS<=12m vs. OS>12m	CRP	0.712625	0.636602	0.788648	24.5	0.783784	0.666667
1L Disc. OS<=12m vs. OS>12m	NCR1	0.710817	0.639144	0.782489	3.9628	0.853659	0.504348
1L Disc. OS<=12m vs. OS>12m	TNF	0.70912	0.635446	0.782793	3.10788	0.792683	0.608696
1L Disc. OS<=12m vs. OS>12m	Gal-9	0.70562	0.633205	0.778035	8.22647	0.646341	0.713043
1L Disc. OS<=12m vs. OS>12m	ANGPT2	0.701273	0.626508	0.776037	5.80562	0.646341	0.747826
1L Disc. OS<=12m vs. OS>12m	IL-10	0.694698	0.616812	0.772584	3.19351	0.5	0.86087
1L Disc. OS<=12m vs. OS>12m	CD27	0.69088	0.616478	0.765282	8.054	0.573171	0.747826
1L Disc. OS<=12m vs. OS>12m	Albumin	0.690319	0.607704	0.772934	37.5	0.6875	0.618557
1L Disc. OS<=12m vs. OS>12m	TNFRSF12A	0.687805	0.613174	0.762435	5.70919	0.719512	0.582609
1L Disc. OS<=12m vs. OS>12m	IL-12RB1	0.685472	0.611193	0.759751	1.82598	0.585366	0.73913
1L Disc. OS<=12m vs. OS>12m	IL-18	0.682291	0.607207	0.757374	8.66449	0.634146	0.678261
1L Disc. OS<=12m vs. OS>12m	Neutrocytes	0.677703	0.599749	0.755657	6.345	0.662162	0.6
1L Disc. OS<=12m vs. OS>12m	KLRD1	0.674761	0.598811	0.750712	6.26506	0.573171	0.730435
1L Disc. OS<=12m vs. OS>12m	CD40	0.671686	0.59438	0.748992	10.2455	0.853659	0.478261
1L Disc. OS<=12m vs. OS>12m	TIE2	0.669035	0.592487	0.745583	7.47626	0.634146	0.686957
1L Disc. OS<=12m vs. OS>12m	TNFRSF9	0.665642	0.590218	0.741065	6.70928	0.743902	0.547826
1L Disc. OS<=12m vs. OS>12m	CXCL1	0.665429	0.587529	0.74333	9.16385	0.621951	0.730435
1L Disc. OS<=12m vs. OS>12m	CCL3	0.662778	0.584411	0.741146	6.35339	0.5	0.817391
1L Disc. OS<=12m vs. OS>12m	CXCL13	0.662354	0.58636	0.738349	8.64916	0.47561	0.765217
1L Disc. OS<=12m vs. OS>12m	LAP-TGF-beta-1	0.662036	0.585665	0.738407	9.70955	0.695122	0.608696
1L Disc. OS<=12m vs. OS>12m	CCL20	0.661612	0.583284	0.73994	7.95986	0.536585	0.808696
1L Disc. OS<=12m vs. OS>12m	TNFRSF4	0.661082	0.584902	0.737261	5.21037	0.585366	0.73913
1L Disc. OS<=12m vs. OS>12m	NOS3	0.658218	0.581671	0.734766	2.13644	0.731707	0.565217
1L Disc. OS<=12m vs. OS>12m	TNFSF14	0.657264	0.579445	0.735083	6.12393	0.487805	0.782609
1L Disc. OS<=12m vs. OS>12m	ADGRG1	0.654931	0.57547	0.734392	2.41135	0.597561	0.704348
1L Disc. OS<=12m vs. OS>12m	CX3CL1	0.654295	0.577423	0.731167	7.11568	0.597561	0.634783
1L Disc. OS<=12m vs. OS>12m	IL-7	0.653128	0.575823	0.730434	5.7106	0.560976	0.721739
1L Disc. OS<=12m vs. OS>12m	MMP12	0.646448	0.569411	0.723484	8.50194	0.804878	0.504348
1L Disc. OS<=12m vs. OS>12m	PTN	0.646235	0.568551	0.723919	1.62358	0.536585	0.73913
1L Disc. OS<=12m vs. OS>12m	MCP-3	0.641782	0.563555	0.720008	3.14073	0.573171	0.686957
1L Disc. OS<=12m vs. OS>12m	DCN	0.634252	0.55698	0.711525	4.52008	0.817073	0.408696
1L Disc. OS<=12m vs. OS>12m	CD5	0.63404	0.554698	0.713382	5.04792	0.597561	0.686957
1L Disc. OS<=12m vs. OS>12m	CXCL12	0.633828	0.554644	0.713013	0.437785	0.597561	0.652174
1L Disc. OS<=12m vs. OS>12m	IL-8	0.63245	0.552156	0.712743	8.65132	0.512195	0.765217
1L Disc. OS<=12m vs. OS>12m	CXCL11	0.631389	0.553236	0.709543	8.56251	0.695122	0.565217
1L Disc. OS<=12m vs. OS>12m	CD70	0.629799	0.552659	0.706938	4.65343	0.756098	0.521739
1L Disc. OS<=12m vs. OS>12m	CASP-8	0.628579	0.550584	0.706574	4.82498	0.804878	0.417391
1L Disc. OS<=12m vs. OS>12m	CCL19	0.627996	0.550793	0.705199	10.2098	0.865854	0.4
1L Disc. OS<=12m vs. OS>12m	GZMH	0.626935	0.548956	0.704915	4.59577	0.621951	0.6
1L Disc. OS<=12m vs. OS>12m	FGF2	0.626617	0.547501	0.705734	-0.508905	0.487805	0.756522
1L Disc. OS<=12m vs. OS>12m	Gal-1	0.623966	0.544992	0.702941	6.92651	0.536585	0.695652
1L Disc. OS<=12m vs. OS>12m	CCL4	0.621527	0.542237	0.700817	7.2449	0.52439	0.704348
1L Disc. OS<=12m vs. OS>12m	CA199	0.618717	0.54015	0.697284	732.5	0.817073	0.426087
1L Disc. OS<=12m vs. OS>12m	CA199	0.618717	0.54015	0.697284	732.5	0.817073	0.426087
1L Disc. OS<=12m vs. OS>12m	MIC-A/B	0.618558	0.540828	0.696288	5.5415	0.829268	0.443478
1L Disc. OS<=12m vs. OS>12m	PDCD1	0.611135	0.530752	0.691518	4.84122	0.536585	0.704348
1L Disc. OS<=12m vs. OS>12m	MMP7	0.607635	0.527754	0.687516	11.8903	0.52439	0.721739
1L Disc. OS<=12m vs. OS>12m	GZMB	0.605832	0.526463	0.685202	4.77287	0.780488	0.513043
1L Disc. OS<=12m vs. OS>12m	CD244	0.601909	0.522507	0.68131	6.57416	0.829268	0.373913
1L Disc. OS<=12m vs. OS>12m	Lymphocytes	0.600392	0.506197	0.694587	1.145	0.857143	0.353659
1L Disc. OS<=12m vs. OS>12m	MCP-1	0.598038	0.518423	0.677654	11.6914	0.707317	0.486957
1L Disc. OS<=12m vs. OS>12m	CD40-L	0.596501	0.516106	0.676895	7.95474	0.658537	0.573913
1L Disc. OS<=12m vs. OS>12m	CRTAM	0.593531	0.513507	0.673556	5.66159	0.47561	0.686957
1L Disc. OS<=12m vs. OS>12m	TWEAK	0.591304	0.512096	0.670512	8.44061	0.817073	0.356522
1L Disc. OS<=12m vs. OS>12m	ADA	0.590456	0.51082	0.670092	5.01136	0.670732	0.556522
1L Disc. OS<=12m vs. OS>12m	IL-12	0.59035	0.510469	0.670231	6.85922	0.743902	0.478261
1L Disc. OS<=12m vs. OS>12m	CD28	0.590138	0.509583	0.670693	0.48184	0.54878	0.643478
1L Disc. OS<=12m vs. OS>12m	GZMA	0.588971	0.509422	0.66852	6.44071	0.670732	0.521739
1L Disc. OS<=12m vs. OS>12m	LAG3	0.581972	0.502192	0.661752	2.99241	0.731707	0.478261
1L Disc. OS<=12m vs. OS>12m	ARG1	0.580488	0.50008	0.660895	3.21701	0.609756	0.565217
1L Disc. OS<=12m vs. OS>12m	CXCL5	0.580488	0.499841	0.661135	11.9665	0.768293	0.434783
1L Disc. OS<=12m vs. OS>12m	CXCL9	0.580276	0.500297	0.660254	7.49177	0.597561	0.573913
1L Disc. OS<=12m vs. OS>12m	CAIX	0.579958	0.497886	0.662029	5.85541	0.47561	0.730435
1L Disc. OS<=12m vs. OS>12m	EGF	0.57561	0.494155	0.657064	9.63568	0.487805	0.704348
1L Disc. OS<=12m vs. OS>12m	Bilirubin	0.573746	0.491238	0.656254	9.5	0.407407	0.769912
1L Disc. OS<=12m vs. OS>12m	IFN-gamma	0.569883	0.489051	0.650715	6.32174	0.47561	0.678261
1L Disc. OS<=12m vs. OS>12m	CD83	0.568929	0.488609	0.649249	3.16413	0.829268	0.33913
1L Disc. OS<=12m vs. OS>12m	ANGPT1	0.567975	0.486625	0.649324	10.3736	0.792683	0.347826
1L Disc. OS<=12m vs. OS>12m	IL-33	0.563839	0.482686	0.644992	0.737055	0.621951	0.530435
1L Disc. OS<=12m vs. OS>12m	IL-5	0.563627	0.481053	0.6462	0.000165	0.353659	0.791304
1L Disc. OS<=12m vs. OS>12m	CXCL10	0.560551	0.479401	0.641702	9.94893	0.756098	0.46087
1L Disc. OS<=12m vs. OS>12m	CD8A	0.551962	0.470085	0.633838	9.08046	0.585366	0.556522
1L Disc. OS<=12m vs. OS>12m	VEGFR-2	0.551326	0.470282	0.632369	8.00737	0.853659	0.26087
1L Disc. OS<=12m vs. OS>12m	MCP-4	0.543478	0.462109	0.624847	9.24685	0.695122	0.504348
1L Disc. OS<=12m vs. OS>12m	TRAIL-	0.539555	0.458324	0.620786	7.97514	0.853659	0.286957
1L Disc. OS<=12m vs. OS>12m	PDGF-subunit-B	0.530435	0.449239	0.611631	9.65796	0.707317	0.417391
1L Disc. OS<=12m vs. OS>12m	KIR3DL1	0.523224	0.440797	0.60565	3.21896	0.97561	0.113043
1L Disc. OS<=12m vs. OS>12m	CCL17	0.517815	0.436987	0.598643	10.0127	0.731707	0.426087
1L Disc. OS<=12m vs. OS>12m	IL-4	0.515642	0.430927	0.600356	-0.401095	0.304878	0.834783
1L Disc. OS<=12m vs. OS>12m	HO-1	0.515058	0.431519	0.598598	10.5214	0.560976	0.565217
1L Disc. OS<=12m vs. OS>12m	FASLG	0.509332	0.427611	0.591053	5.62864	0.682927	0.408696
1L Disc. OS<=12m vs. OS>12m	ICOSLG	0.506787	0.424349	0.589225	5.97963	0.439024	0.626087
1L Disc. OS<=12m vs. OS>12m	MCP-2	0.478897	0.397387	0.560407	7.93278	0.597561	0.443478
1L Disc. OS<=12m vs. OS>12m	LAMP3	0.467232	0.385746	0.548719	4.79803	0.512195	0.513043
1L Disc. OS<=3m vs. OS>24m	CCL23	0.897868	0.822893	0.972842	10.3649	0.909091	0.740741
1L Disc. OS<=3m vs. OS>24m	IL-15	0.892256	0.802023	0.982489	4.91132	0.909091	0.814815
1L Disc. OS<=3m vs. OS>24m	MUC-16	0.890011	0.807221	0.972802	4.10971	0.878788	0.851852
1L Disc. OS<=3m vs. OS>24m	IL-6	0.882155	0.783767	0.980543	3.43096	0.848485	0.925926
1L Disc. OS<=3m vs. OS>24m	CSF-1	0.87991	0.795699	0.964121	9.27635	0.727273	0.925926
1L Disc. OS<=3m vs. OS>24m	CRP	0.874667	0.77755	0.971783	24.5	0.833333	0.88
1L Disc. OS<=3m vs. OS>24m	NLR	0.835859	0.681729	0.989988	3.87141	0.818182	0.888889
1L Disc. OS<=3m vs. OS>24m	HGF	0.833895	0.731054	0.936735	10.0238	0.969697	0.62963
1L Disc. OS<=3m vs. OS>24m	PD-L2	0.830527	0.725943	0.935111	2.07314	0.909091	0.62963
1L Disc. OS<=3m vs. OS>24m	PD-L1	0.829405	0.727626	0.931184	6.06965	0.909091	0.62963
1L Disc. OS<=3m vs. OS>24m	TNFRSF21	0.829405	0.72396	0.934851	7.38497	0.878788	0.666667
1L Disc. OS<=3m vs. OS>24m	SII	0.805556	0.650195	0.960916	967.461	0.727273	0.888889
1L Disc. OS<=3m vs. OS>24m	Neutrocytes	0.802849	0.685507	0.92019	5.23	0.586207	0.956522
1L Disc. OS<=3m vs. OS>24m	ANGPT2	0.780022	0.66142	0.898625	5.91416	0.757576	0.777778
1L Disc. OS<=3m vs. OS>24m	PGF	0.780022	0.663791	0.896254	7.23719	0.757576	0.703704
1L Disc. OS<=3m vs. OS>24m	CD40	0.769921	0.647718	0.892125	10.1944	0.757576	0.740741
1L Disc. OS<=3m vs. OS>24m	TNF	0.767677	0.643412	0.891941	3.07539	0.787879	0.777778
1L Disc. OS<=3m vs. OS>24m	CD27	0.762065	0.638396	0.885734	8.04047	0.575758	0.925926
1L Disc. OS<=3m vs. OS>24m	NCR1	0.760943	0.639985	0.8819	3.89571	0.787879	0.62963
1L Disc. OS<=3m vs. OS>24m	CXCL1	0.75982	0.634614	0.885026	9.16498	0.666667	0.888889
1L Disc. OS<=3m vs. OS>24m	CASP-8	0.758698	0.636605	0.880791	4.71149	0.757576	0.703704
1L Disc. OS<=3m vs. OS>24m	IL-10	0.756453	0.627775	0.885132	3.57777	0.69697	0.888889
1L Disc. OS<=3m vs. OS>24m	TNFRSF12A	0.754209	0.631742	0.876676	5.84805	0.787879	0.62963
1L Disc. OS<=3m vs. OS>24m	TNFSF14	0.749719	0.619207	0.880232	6.66345	0.757576	0.814815
1L Disc. OS<=3m vs. OS>24m	KLRD1	0.747475	0.619798	0.875152	6.53883	0.757576	0.666667
1L Disc. OS<=3m vs. OS>24m	VEGFA	0.747475	0.621592	0.873358	8.6075	0.69697	0.740741
1L Disc. OS<=3m vs. OS>24m	IL-18	0.736251	0.610816	0.861687	8.35221	0.454545	0.962963
1L Disc. OS<=3m vs. OS>24m	Gal-9	0.734007	0.601774	0.866239	8.11189	0.636364	0.814815
1L Disc. OS<=3m vs. OS>24m	CCL20	0.731762	0.600452	0.863072	7.81395	0.606061	0.851852
1L Disc. OS<=3m vs. OS>24m	IL-8	0.731762	0.604804	0.85872	7.97957	0.424242	1
1L Disc. OS<=3m vs. OS>24m	TNFRSF4	0.728395	0.59351	0.86328	5.6353	0.878788	0.592593
1L Disc. OS<=3m vs. OS>24m	TNFRSF9	0.722783	0.593188	0.852379	6.70928	0.787879	0.555556
1L Disc. OS<=3m vs. OS>24m	CX3CL1	0.720539	0.591294	0.849783	6.93188	0.515152	0.851852
1L Disc. OS<=3m vs. OS>24m	PTN	0.709315	0.574437	0.844193	1.54554	0.575758	0.925926
1L Disc. OS<=3m vs. OS>24m	CCL3	0.708193	0.57091	0.845476	6.47566	0.545455	0.851852
1L Disc. OS<=3m vs. OS>24m	CCL19	0.707071	0.569589	0.844552	10.0701	0.787879	0.666667
1L Disc. OS<=3m vs. OS>24m	TIE2	0.707071	0.573261	0.84088	7.59636	0.787879	0.592593
1L Disc. OS<=3m vs. OS>24m	IL-12RB1	0.704826	0.569121	0.840531	2.4438	0.939394	0.444444
1L Disc. OS<=3m vs. OS>24m	MCP-3	0.704826	0.570144	0.839508	3.07802	0.69697	0.740741
1L Disc. OS<=3m vs. OS>24m	Gal-1	0.703704	0.569521	0.837886	7.13603	0.909091	0.444444
1L Disc. OS<=3m vs. OS>24m	DCN	0.701459	0.561269	0.84165	4.62498	0.969697	0.407407
1L Disc. OS<=3m vs. OS>24m	GZMH	0.701459	0.56881	0.834108	4.59568	0.606061	0.777778
1L Disc. OS<=3m vs. OS>24m	CXCL13	0.69697	0.559912	0.834028	9.41245	0.909091	0.444444
1L Disc. OS<=3m vs. OS>24m	MIC-A/B	0.685746	0.54979	0.821703	5.37259	0.727273	0.592593
1L Disc. OS<=3m vs. OS>24m	CD5	0.684624	0.541712	0.827536	5.27664	0.757576	0.703704
1L Disc. OS<=3m vs. OS>24m	CD70	0.683502	0.535372	0.831632	4.78601	0.939394	0.518519
1L Disc. OS<=3m vs. OS>24m	NOS3	0.683502	0.543674	0.82333	2.20451	0.818182	0.518519
1L Disc. OS<=3m vs. OS>24m	Lymphocytes	0.681818	0.496529	0.867108	1.085	0.954545	0.5
1L Disc. OS<=3m vs. OS>24m	LAP-TGF-beta-1	0.681257	0.5419	0.820614	9.75053	0.727273	0.62963
1L Disc. OS<=3m vs. OS>24m	GZMB	0.680135	0.53873	0.82154	4.79967	0.818182	0.555556
1L Disc. OS<=3m vs. OS>24m	CRTAM	0.67789	0.541812	0.813968	5.91519	0.636364	0.666667
1L Disc. OS<=3m vs. OS>24m	FGF2	0.676768	0.538296	0.815239	0.38924	0.909091	0.407407
1L Disc. OS<=3m vs. OS>24m	MMP12	0.672278	0.528662	0.815894	8.5993	0.939394	0.444444
1L Disc. OS<=3m vs. OS>24m	MMP7	0.671156	0.532079	0.810233	11.8759	0.575758	0.777778
1L Disc. OS<=3m vs. OS>24m	CA199	0.669473	0.518067	0.820878	625.5	0.969697	0.481481
1L Disc. OS<=3m vs. OS>24m	CA199	0.669473	0.518067	0.820878	625.5	0.969697	0.481481
1L Disc. OS<=3m vs. OS>24m	MCP-1	0.66835	0.530752	0.805948	11.6621	0.727273	0.555556
1L Disc. OS<=3m vs. OS>24m	CXCL11	0.665544	0.526974	0.804115	7.94109	0.454545	0.888889
1L Disc. OS<=3m vs. OS>24m	PDGF-subunit-B	0.661055	0.516908	0.805202	9.80271	0.939394	0.37037
1L Disc. OS<=3m vs. OS>24m	ARG1	0.653199	0.512124	0.794273	3.3291	0.666667	0.62963
1L Disc. OS<=3m vs. OS>24m	EGF	0.649832	0.506528	0.793135	9.99404	0.666667	0.703704
1L Disc. OS<=3m vs. OS>24m	ADA	0.648709	0.50238	0.795038	5.18814	0.818182	0.481481
1L Disc. OS<=3m vs. OS>24m	ADGRG1	0.648709	0.508664	0.788754	3.29783	0.818182	0.444444
1L Disc. OS<=3m vs. OS>24m	Albumin	0.647727	0.477031	0.818424	34.5	0.818182	0.5
1L Disc. OS<=3m vs. OS>24m	CXCL12	0.647587	0.506764	0.78841	0.43302	0.575758	0.740741
1L Disc. OS<=3m vs. OS>24m	CCL4	0.641975	0.500513	0.783438	7.14216	0.454545	0.814815
1L Disc. OS<=3m vs. OS>24m	CD8A	0.641975	0.499296	0.784654	9.12106	0.636364	0.703704
1L Disc. OS<=3m vs. OS>24m	CAIX	0.632997	0.488609	0.777384	5.85541	0.575758	0.740741
1L Disc. OS<=3m vs. OS>24m	CD40-L	0.617284	0.472628	0.76194	7.92955	0.666667	0.592593
1L Disc. OS<=3m vs. OS>24m	CXCL9	0.609428	0.461558	0.757297	7.08781	0.454545	0.814815
1L Disc. OS<=3m vs. OS>24m	IFN-gamma	0.609428	0.463444	0.755412	7.55441	0.939394	0.259259
1L Disc. OS<=3m vs. OS>24m	CD28	0.608305	0.461347	0.755263	0.670215	0.787879	0.444444
1L Disc. OS<=3m vs. OS>24m	CD83	0.606061	0.45968	0.752441	2.71814	0.545455	0.703704
1L Disc. OS<=3m vs. OS>24m	IL-7	0.606061	0.460085	0.752036	5.96132	0.636364	0.592593
1L Disc. OS<=3m vs. OS>24m	IL-33	0.602694	0.457567	0.747821	0.91833	0.818182	0.407407
1L Disc. OS<=3m vs. OS>24m	TWEAK	0.602694	0.456266	0.749121	8.39778	0.818182	0.407407
1L Disc. OS<=3m vs. OS>24m	GZMA	0.597082	0.447397	0.746767	6.91179	0.878788	0.407407
1L Disc. OS<=3m vs. OS>24m	CD244	0.59596	0.446147	0.745772	6.58871	0.818182	0.407407
1L Disc. OS<=3m vs. OS>24m	PDCD1	0.594837	0.447342	0.742333	4.73487	0.454545	0.814815
1L Disc. OS<=3m vs. OS>24m	Bilirubin	0.593333	0.440737	0.74593	35.5	0.939394	0.28
1L Disc. OS<=3m vs. OS>24m	CXCL5	0.586981	0.438673	0.735289	11.3376	0.484848	0.777778
1L Disc. OS<=3m vs. OS>24m	LAG3	0.581369	0.427652	0.735087	2.95501	0.69697	0.555556
1L Disc. OS<=3m vs. OS>24m	ANGPT1	0.580247	0.432773	0.727721	10.272	0.636364	0.555556
1L Disc. OS<=3m vs. OS>24m	LAMP3	0.579125	0.428383	0.729866	5.42231	0.909091	0.333333
1L Disc. OS<=3m vs. OS>24m	CCL17	0.578002	0.422627	0.733378	9.09473	0.878788	0.444444
1L Disc. OS<=3m vs. OS>24m	KIR3DL1	0.578002	0.430657	0.725347	1.30587	0.515152	0.703704
1L Disc. OS<=3m vs. OS>24m	CXCL10	0.571268	0.420646	0.72189	9.82505	0.757576	0.518519
1L Disc. OS<=3m vs. OS>24m	HO-1	0.564534	0.415733	0.713335	10.7163	0.545455	0.703704
1L Disc. OS<=3m vs. OS>24m	TRAIL-	0.561167	0.41042	0.711915	8.01858	0.787879	0.407407
1L Disc. OS<=3m vs. OS>24m	MCP-4	0.549944	0.397108	0.70278	9.0282	0.69697	0.555556
1L Disc. OS<=3m vs. OS>24m	IL-12	0.548822	0.394344	0.703299	6.74165	0.727273	0.481481
1L Disc. OS<=3m vs. OS>24m	IL-4	0.547699	0.39984	0.695559	-0.43322	0.242424	0.962963
1L Disc. OS<=3m vs. OS>24m	ICOSLG	0.530864	0.378054	0.683675	5.95882	0.575758	0.703704
1L Disc. OS<=3m vs. OS>24m	VEGFR-2	0.514029	0.36322	0.664838	7.66401	0.424242	0.740741
1L Disc. OS<=3m vs. OS>24m	IL-5	0.497194	0.348533	0.645856	0.98094	0.272727	0.851852
1L Disc. OS<=3m vs. OS>24m	FASLG	0.496072	0.346655	0.645489	5.90294	0.333333	0.777778
1L Disc. OS<=3m vs. OS>24m	MCP-2	0.472503	0.322146	0.62286	8.02281	0.545455	0.555556
1L Disc. OS<=6m vs. OS>18m	IL-15	0.869687	0.802085	0.93729	4.73177	0.74	0.890625
1L Disc. OS<=6m vs. OS>18m	IL-6	0.86625	0.791497	0.941003	3.40164	0.84	0.84375
1L Disc. OS<=6m vs. OS>18m	MUC-16	0.864375	0.798185	0.930565	3.35732	0.8	0.796875
1L Disc. OS<=6m vs. OS>18m	CSF-1	0.86375	0.797295	0.930205	9.32872	0.74	0.84375
1L Disc. OS<=6m vs. OS>18m	CCL23	0.858437	0.789945	0.92693	10.3649	0.88	0.75
1L Disc. OS<=6m vs. OS>18m	NLR	0.851573	0.760492	0.942654	3.80891	0.764706	0.883721
1L Disc. OS<=6m vs. OS>18m	TNFRSF21	0.825	0.749416	0.900584	7.28985	0.7	0.8125
1L Disc. OS<=6m vs. OS>18m	SII	0.819425	0.721588	0.917263	1659.02	0.911765	0.674419
1L Disc. OS<=6m vs. OS>18m	PD-L2	0.812813	0.736172	0.889453	2.0615	0.88	0.609375
1L Disc. OS<=6m vs. OS>18m	PD-L1	0.806875	0.727143	0.886607	5.68605	0.68	0.8125
1L Disc. OS<=6m vs. OS>18m	PGF	0.80625	0.72684	0.88566	7.08568	0.62	0.875
1L Disc. OS<=6m vs. OS>18m	HGF	0.804063	0.726275	0.88185	10.0238	0.9	0.578125
1L Disc. OS<=6m vs. OS>18m	CRP	0.799821	0.712897	0.886744	24.5	0.844444	0.758065
1L Disc. OS<=6m vs. OS>18m	Neutrocytes	0.782743	0.694796	0.870689	6.09	0.727273	0.711864
1L Disc. OS<=6m vs. OS>18m	NCR1	0.778438	0.69451	0.862365	3.88774	0.78	0.65625
1L Disc. OS<=6m vs. OS>18m	TNFRSF12A	0.770938	0.684881	0.856994	5.85199	0.78	0.640625
1L Disc. OS<=6m vs. OS>18m	TNFRSF4	0.764687	0.678373	0.851002	5.20242	0.62	0.84375
1L Disc. OS<=6m vs. OS>18m	VEGFA	0.761563	0.673475	0.84965	8.43219	0.58	0.84375
1L Disc. OS<=6m vs. OS>18m	ANGPT2	0.755938	0.665458	0.846417	5.90139	0.76	0.734375
1L Disc. OS<=6m vs. OS>18m	IL-10	0.748437	0.651205	0.84567	3.55385	0.7	0.8125
1L Disc. OS<=6m vs. OS>18m	CD27	0.74625	0.655973	0.836527	8.09713	0.64	0.78125
1L Disc. OS<=6m vs. OS>18m	TNFRSF9	0.743437	0.654873	0.832002	6.70928	0.8	0.59375
1L Disc. OS<=6m vs. OS>18m	CXCL1	0.742812	0.649867	0.835758	9.07363	0.62	0.875
1L Disc. OS<=6m vs. OS>18m	Gal-9	0.740313	0.650079	0.830546	8.22181	0.68	0.71875
1L Disc. OS<=6m vs. OS>18m	TIE2	0.735938	0.644035	0.82784	7.60365	0.8	0.59375
1L Disc. OS<=6m vs. OS>18m	IL-12RB1	0.729375	0.636541	0.822209	1.87339	0.62	0.765625
1L Disc. OS<=6m vs. OS>18m	IL-8	0.728437	0.633714	0.823161	8.65132	0.52	0.859375
1L Disc. OS<=6m vs. OS>18m	TNF	0.728125	0.634171	0.822079	3.10535	0.8	0.671875
1L Disc. OS<=6m vs. OS>18m	CCL20	0.7225	0.627619	0.817381	7.96594	0.56	0.84375
1L Disc. OS<=6m vs. OS>18m	CX3CL1	0.7225	0.629186	0.815814	6.93188	0.5	0.859375
1L Disc. OS<=6m vs. OS>18m	ADGRG1	0.713125	0.61661	0.80964	3.32199	0.82	0.53125
1L Disc. OS<=6m vs. OS>18m	Albumin	0.711204	0.603615	0.818794	37.5	0.685714	0.647059
1L Disc. OS<=6m vs. OS>18m	CXCL13	0.710313	0.616175	0.80445	9.50862	0.92	0.40625
1L Disc. OS<=6m vs. OS>18m	IL-18	0.708438	0.612972	0.803903	8.64738	0.6	0.71875
1L Disc. OS<=6m vs. OS>18m	CD40	0.697187	0.598847	0.795528	10.2455	0.86	0.5
1L Disc. OS<=6m vs. OS>18m	NOS3	0.695	0.598829	0.791171	2.14514	0.76	0.578125
1L Disc. OS<=6m vs. OS>18m	CCL19	0.691562	0.595186	0.787939	10.2098	0.9	0.46875
1L Disc. OS<=6m vs. OS>18m	CD70	0.687187	0.589802	0.784573	4.7594	0.9	0.5
1L Disc. OS<=6m vs. OS>18m	MIC-A/B	0.686875	0.590294	0.783456	5.38305	0.78	0.578125
1L Disc. OS<=6m vs. OS>18m	PTN	0.684375	0.58557	0.78318	1.54554	0.56	0.78125
1L Disc. OS<=6m vs. OS>18m	DCN	0.684063	0.587628	0.780497	4.63786	1	0.359375
1L Disc. OS<=6m vs. OS>18m	Lymphocytes	0.680233	0.560137	0.800328	1.145	0.941176	0.418605
1L Disc. OS<=6m vs. OS>18m	MCP-3	0.676875	0.576897	0.776853	3.13731	0.64	0.6875
1L Disc. OS<=6m vs. OS>18m	CXCL11	0.675625	0.575219	0.776031	8.63467	0.76	0.5625
1L Disc. OS<=6m vs. OS>18m	MMP12	0.675	0.576536	0.773464	8.35008	0.8	0.546875
1L Disc. OS<=6m vs. OS>18m	CA199	0.672813	0.573218	0.772407	231	0.74	0.59375
1L Disc. OS<=6m vs. OS>18m	CA199	0.672813	0.573218	0.772407	231	0.74	0.59375
1L Disc. OS<=6m vs. OS>18m	TNFSF14	0.666562	0.564001	0.769124	6.48243	0.62	0.703125
1L Disc. OS<=6m vs. OS>18m	KLRD1	0.664375	0.563389	0.765361	6.26506	0.5	0.765625
1L Disc. OS<=6m vs. OS>18m	MCP-1	0.663594	0.562305	0.764882	11.6914	0.72	0.59375
1L Disc. OS<=6m vs. OS>18m	MMP7	0.66125	0.557775	0.764725	11.8908	0.62	0.734375
1L Disc. OS<=6m vs. OS>18m	CD5	0.659062	0.556729	0.761396	5.2953	0.76	0.578125
1L Disc. OS<=6m vs. OS>18m	CASP-8	0.657813	0.556724	0.758901	4.65829	0.72	0.5625
1L Disc. OS<=6m vs. OS>18m	Gal-1	0.656875	0.556781	0.756969	6.847	0.38	0.859375
1L Disc. OS<=6m vs. OS>18m	IL-7	0.656563	0.555132	0.757993	5.64654	0.54	0.734375
1L Disc. OS<=6m vs. OS>18m	LAP-TGF-beta-1	0.656563	0.555924	0.757201	9.5643	0.56	0.734375
1L Disc. OS<=6m vs. OS>18m	CCL3	0.64875	0.544122	0.753378	6.48745	0.54	0.8125
1L Disc. OS<=6m vs. OS>18m	GZMB	0.64375	0.54132	0.74618	4.6829	0.72	0.578125
1L Disc. OS<=6m vs. OS>18m	ADA	0.638437	0.536468	0.740407	5.01136	0.64	0.640625
1L Disc. OS<=6m vs. OS>18m	IL-12	0.63625	0.533434	0.739066	6.88169	0.82	0.46875
1L Disc. OS<=6m vs. OS>18m	CXCL12	0.634062	0.530129	0.737996	0.4311	0.56	0.703125
1L Disc. OS<=6m vs. OS>18m	CAIX	0.630313	0.525849	0.734776	5.85541	0.52	0.765625
1L Disc. OS<=6m vs. OS>18m	CRTAM	0.626563	0.52361	0.729515	6.30661	0.9	0.328125
1L Disc. OS<=6m vs. OS>18m	CXCL9	0.622188	0.518917	0.725458	7.75959	0.74	0.5
1L Disc. OS<=6m vs. OS>18m	GZMH	0.622188	0.518774	0.725601	4.01176	0.32	0.890625
1L Disc. OS<=6m vs. OS>18m	FGF2	0.620625	0.516337	0.724913	-0.508905	0.44	0.796875
1L Disc. OS<=6m vs. OS>18m	CD8A	0.617812	0.511929	0.723696	9.1074	0.64	0.609375
1L Disc. OS<=6m vs. OS>18m	CD28	0.613125	0.50929	0.71696	0.778535	0.86	0.359375
1L Disc. OS<=6m vs. OS>18m	PDCD1	0.611563	0.505386	0.717739	4.83133	0.52	0.71875
1L Disc. OS<=6m vs. OS>18m	CCL4	0.603437	0.497918	0.708957	7.18679	0.5	0.71875
1L Disc. OS<=6m vs. OS>18m	ARG1	0.592812	0.486942	0.698683	3.20534	0.6	0.625
1L Disc. OS<=6m vs. OS>18m	CD83	0.5875	0.481534	0.693466	2.68829	0.48	0.71875
1L Disc. OS<=6m vs. OS>18m	CXCL10	0.584688	0.477134	0.692241	9.90254	0.76	0.515625
1L Disc. OS<=6m vs. OS>18m	TRAIL-	0.569688	0.463667	0.675708	8.30521	0.56	0.625
1L Disc. OS<=6m vs. OS>18m	TWEAK	0.569375	0.463448	0.675302	8.36818	0.82	0.359375
1L Disc. OS<=6m vs. OS>18m	IL-33	0.567187	0.459953	0.674422	0.738445	0.6	0.546875
1L Disc. OS<=6m vs. OS>18m	GZMA	0.55875	0.452958	0.664542	6.99478	0.88	0.28125
1L Disc. OS<=6m vs. OS>18m	CD244	0.558438	0.452228	0.664647	6.58072	0.82	0.34375
1L Disc. OS<=6m vs. OS>18m	ANGPT1	0.555937	0.447521	0.664354	10.0142	0.32	0.84375
1L Disc. OS<=6m vs. OS>18m	CCL17	0.555625	0.448888	0.662362	9.09473	0.86	0.421875
1L Disc. OS<=6m vs. OS>18m	MCP-4	0.552188	0.445062	0.659313	9.01647	0.74	0.46875
1L Disc. OS<=6m vs. OS>18m	KIR3DL1	0.55	0.441715	0.658285	1.3274	0.54	0.578125
1L Disc. OS<=6m vs. OS>18m	IFN-gamma	0.548438	0.440795	0.65608	6.32174	0.44	0.6875
1L Disc. OS<=6m vs. OS>18m	LAG3	0.548125	0.441572	0.654678	3.27286	0.84	0.3125
1L Disc. OS<=6m vs. OS>18m	CXCL5	0.541875	0.434553	0.649197	12.0326	0.82	0.359375
1L Disc. OS<=6m vs. OS>18m	CD40-L	0.54	0.432033	0.647967	7.94831	0.62	0.53125
1L Disc. OS<=6m vs. OS>18m	VEGFR-2	0.535312	0.426789	0.643836	7.66401	0.42	0.734375
1L Disc. OS<=6m vs. OS>18m	EGF	0.530937	0.422094	0.639781	9.54077	0.46	0.6875
1L Disc. OS<=6m vs. OS>18m	IL-5	0.530312	0.421343	0.639282	0.97995	0.34	0.796875
1L Disc. OS<=6m vs. OS>18m	PDGF-subunit-B	0.521563	0.414664	0.628461	9.80271	0.92	0.21875
1L Disc. OS<=6m vs. OS>18m	IL-4	0.515	0.404814	0.625186	0.103065	0.58	0.53125
1L Disc. OS<=6m vs. OS>18m	FASLG	0.50875	0.40136	0.61614	5.6173	0.7	0.40625
1L Disc. OS<=6m vs. OS>18m	HO-1	0.505938	0.395512	0.616363	9.78673	0.12	0.984375
1L Disc. OS<=6m vs. OS>18m	MCP-2	0.50375	0.395938	0.611562	7.96898	0.64	0.453125
1L Disc. OS<=6m vs. OS>18m	ICOSLG	0.499688	0.391025	0.60835	5.97168	0.48	0.640625
1L Disc. OS<=6m vs. OS>18m	Bilirubin	0.482581	0.373458	0.591703	11.5	0.64	0.419355
1L Disc. OS<=6m vs. OS>18m	LAMP3	0.454688	0.347255	0.56212	4.79261	0.54	0.5
1L Val. OS<=12m vs. OS>12m	IL-15	0.663138	0.560234	0.766042	4.82121	0.613636	0.69863
1L Val. OS<=12m vs. OS>12m	IL-6	0.644458	0.539291	0.749626	2.81817	0.568182	0.767123
1L Val. OS<=12m vs. OS>12m	MUC-16	0.636675	0.52994	0.74341	3.8264	0.636364	0.630137
1L Val. OS<=12m vs. OS>12m	CSF-1	0.623599	0.519984	0.727214	9.43155	0.818182	0.452055
1L Val. OS<=12m vs. OS>12m	CA199	0.602904	0.483517	0.722291	221	0.722222	0.515152
1L Val. OS<=12m vs. OS>12m	CCL23	0.600249	0.493156	0.707342	10.6575	0.727273	0.506849
1L Val. OS<=12m vs. OS>12m	PD-L1	0.572852	0.460321	0.685383	5.76701	0.636364	0.589041
1L Val. OS<=12m vs. OS>12m	HGF	0.564446	0.457019	0.671873	9.10659	0.545455	0.69863
1L Val. OS<=12m vs. OS>12m	PD-L2	0.557285	0.444986	0.669584	1.73927	0.340909	0.863014
1L Val. OS<=12m vs. OS>12m	TNFRSF12A	0.547011	0.440535	0.653488	6.06172	0.772727	0.383562
1L Val. OS<=12m vs. OS>12m	PGF	0.563823	0.458313	0.669333	745.8	0.818182	0.369863
1L Val. OS<=3m vs. OS>24m	HGF	0.838235	0.679854	0.996616	9.09768	0.833333	0.882353
1L Val. OS<=3m vs. OS>24m	PGF	0.813725	0.655139	0.972312	7.41747	1	0.588235
1L Val. OS<=3m vs. OS>24m	IL-15	0.77451	0.60392	0.9451	5.28254	0.916667	0.529412
1L Val. OS<=3m vs. OS>24m	IL-6	0.769608	0.584112	0.955103	3.55456	0.833333	0.764706
1L Val. OS<=3m vs. OS>24m	PD-L1	0.764706	0.575554	0.953858	5.84338	0.916667	0.705882
1L Val. OS<=3m vs. OS>24m	TNFRSF12A	0.75	0.5693	0.9307	6.06196	0.916667	0.588235
1L Val. OS<=3m vs. OS>24m	CSF-1	0.735294	0.536611	0.933977	9.37791	0.916667	0.647059
1L Val. OS<=3m vs. OS>24m	PD-L2	0.72549	0.511444	0.939537	2.04365	0.75	0.823529
1L Val. OS<=3m vs. OS>24m	MUC-16	0.671569	0.441363	0.901775	2.93032	0.583333	0.823529
1L Val. OS<=3m vs. OS>24m	CCL23	0.632353	0.422393	0.842312	10.6468	0.833333	0.529412
1L Val. OS<=3m vs. OS>24m	CA199	0.496032	0.235349	0.756714	56	0.444444	0.714286
1L Val. OS<=6m vs. OS>18m	IL-15	0.788647	0.673117	0.904178	4.75812	0.695652	0.777778
1L Val. OS<=6m vs. OS>18m	IL-6	0.781401	0.65987	0.902932	3.35979	0.826087	0.75
1L Val. OS<=6m vs. OS>18m	MUC-16	0.774155	0.63641	0.911899	3.79214	0.73913	0.805556
1L Val. OS<=6m vs. OS>18m	CSF-1	0.766908	0.640554	0.893262	9.39139	0.913043	0.666667
1L Val. OS<=6m vs. OS>18m	PD-L1	0.747585	0.616529	0.87864	5.93158	0.869565	0.583333
1L Val. OS<=6m vs. OS>18m	HGF	0.727053	0.593036	0.86107	9.09768	0.652174	0.833333
1L Val. OS<=6m vs. OS>18m	TNFRSF12A	0.713768	0.583308	0.844228	6.06196	0.913043	0.5
1L Val. OS<=6m vs. OS>18m	CA199	0.701389	0.544599	0.858178	238	0.833333	0.59375
1L Val. OS<=6m vs. OS>18m	PGF	0.673913	0.537101	0.810725	7.43232	0.956522	0.444444
1L Val. OS<=6m vs. OS>18m	CCL23	0.650966	0.506818	0.795114	10.6377	0.782609	0.583333
1L Val. OS<=6m vs. OS>18m	PD-L2	0.641304	0.487638	0.79497	1.94512	0.521739	0.777778
2L cohort OS<=12m vs. OS>12m	TNFRSF12A	0.769643	0.624995	0.91429	5.08059	0.642857	0.8
2L cohort OS<=12m vs. OS>12m	PD-L1	0.760714	0.624018	0.897411	5.49374	0.714286	0.775
2L cohort OS<=12m vs. OS>12m	PGF	0.744643	0.607147	0.882139	7.26394	0.928571	0.525
2L cohort OS<=12m vs. OS>12m	PD-L2	0.735714	0.572308	0.89912	1.79638	0.714286	0.725
2L cohort OS<=12m vs. OS>12m	IL-6	0.723214	0.557789	0.888639	2.95827	0.785714	0.65
2L cohort OS<=12m vs. OS>12m	MUC-16	0.703571	0.539567	0.867576	3.10019	0.714286	0.725
2L cohort OS<=12m vs. OS>12m	HGF	0.701786	0.552404	0.851167	10.0356	1	0.4
2L cohort OS<=12m vs. OS>12m	CCL23	0.691071	0.531275	0.850868	10.4042	1	0.35
2L cohort OS<=12m vs. OS>12m	CSF-1	0.639286	0.456545	0.822026	9.23552	0.5	0.825
2L cohort OS<=12m vs. OS>12m	CA199	0.613636	0.441726	0.785547	372	0.857143	0.484848
2L cohort OS<=12m vs. OS>12m	IL-15	0.571429	0.387536	0.755321	5.21505	0.642857	0.575
2L cohort OS<=3m vs. OS>24m	MUC-16	0.942308	0.814489	1	3.88756	1	0.769231
2L cohort OS<=3m vs. OS>24m	PGF	0.826923	0.624532	1	7.41552	1	0.692308
2L cohort OS<=3m vs. OS>24m	TNFRSF12A	0.807692	0.568318	1	5.08059	0.75	0.846154
2L cohort OS<=3m vs. OS>24m	CA199	0.805556	0.555076	1	380.5	1	0.666667
2L cohort OS<=3m vs. OS>24m	CCL23	0.75	0.456828	1	9.64148	0.75	0.846154
2L cohort OS<=3m vs. OS>24m	IL-15	0.75	0.38782	1	5.08266	0.75	0.846154
2L cohort OS<=3m vs. OS>24m	IL-6	0.730769	0.329511	1	3.70783	0.75	0.769231
2L cohort OS<=3m vs. OS>24m	PD-L1	0.711538	0.387303	1	5.97061	1	0.461538
2L cohort OS<=3m vs. OS>24m	CSF-1	0.673077	0.367643	0.978511	9.54809	1	0.461538
2L cohort OS<=3m vs. OS>24m	PD-L2	0.634615	0.221151	1	2.0404	0.75	0.615385
2L cohort OS<=3m vs. OS>24m	HGF	0.634615	0.368095	0.901135	9.89876	1	0.615385
2L cohort OS<=6m vs. OS>18m	CCL23	0.828125	0.621172	1	9.43851	0.833333	0.875
2L cohort OS<=6m vs. OS>18m	TNFRSF12A	0.822917	0.6311	1	5.08059	0.833333	0.78125
2L cohort OS<=6m vs. OS>18m	PGF	0.796875	0.607915	0.985835	7.10384	0.833333	0.6875
2L cohort OS<=6m vs. OS>18m	MUC-16	0.765625	0.531126	1	1.77666	0.666667	0.90625
2L cohort OS<=6m vs. OS>18m	CA199	0.763333	0.575914	0.950752	380.5	1	0.48
2L cohort OS<=6m vs. OS>18m	IL-15	0.744792	0.480683	1	5.08266	0.833333	0.6875
2L cohort OS<=6m vs. OS>18m	PD-L1	0.713542	0.490022	0.937062	5.40684	0.666667	0.8125
2L cohort OS<=6m vs. OS>18m	IL-6	0.708333	0.447212	0.969455	3.04729	0.666667	0.75
2L cohort OS<=6m vs. OS>18m	HGF	0.677083	0.477779	0.876387	9.85778	1	0.5
2L cohort OS<=6m vs. OS>18m	CSF-1	0.614583	0.322727	0.90644	9.24236	0.5	0.875
2L cohort OS<=6m vs. OS>18m	PD-L2	0.614583	0.312984	0.916182	1.63454	0.5	0.84375
Sugery cohort OS<=6m vs. OS>18m	PD-L2	0.85	0.689066	1	2.00929	0.625	1
Sugery cohort OS<=6m vs. OS>18m	TNFRSF12A	0.841667	0.680571	1	6.37558	0.833333	0.8
Sugery cohort OS<=6m vs. OS>18m	HGF	0.825	0.658574	0.991426	9.65905	0.625	1
Sugery cohort OS<=6m vs. OS>18m	CCL23	0.808333	0.649741	0.966926	10.2639	0.708333	1
Sugery cohort OS<=6m vs. OS>18m	IL-15	0.808333	0.627191	0.989475	4.88316	0.666667	1
Sugery cohort OS<=6m vs. OS>18m	IL-6	0.766667	0.588918	0.944415	2.78361	0.625	1
Sugery cohort OS<=6m vs. OS>18m	PD-L1	0.766667	0.572782	0.960551	5.92558	0.625	1
Sugery cohort OS<=6m vs. OS>18m	PGF	0.716667	0.535157	0.898177	7.16656	0.583333	1
Sugery cohort OS<=6m vs. OS>18m	CA199	0.716667	0.45924	0.974094	162	0.708333	0.8
Sugery cohort OS<=6m vs. OS>18m	CSF-1	0.641667	0.391553	0.891781	9.32114	0.416667	1
Sugery cohort OS<=6m vs. OS>18m	MUC-16	0.508333	0.186727	0.82994	2.01236	0.666667	0.6
Surgery cohort OS<=12m vs. OS>12m	CA199	0.693452	0.515455	0.871449	162	0.678571	0.666667
Surgery cohort OS<=12m vs. OS>12m	PD-L2	0.672619	0.467945	0.877293	2.26565	0.928571	0.416667
Surgery cohort OS<=12m vs. OS>12m	IL-15	0.660714	0.465204	0.856225	4.89841	0.678571	0.75
Surgery cohort OS<=12m vs. OS>12m	TNFRSF12A	0.625	0.429026	0.820974	6.48606	0.857143	0.416667
Surgery cohort OS<=12m vs. OS>12m	HGF	0.613095	0.422638	0.803552	9.07176	0.321429	0.916667
Surgery cohort OS<=12m vs. OS>12m	IL-6	0.583333	0.389171	0.777496	3.36484	0.714286	0.5
Surgery cohort OS<=12m vs. OS>12m	MUC-16	0.577381	0.384709	0.770053	2.54841	0.285714	0.916667
Surgery cohort OS<=12m vs. OS>12m	PD-L1	0.568452	0.357654	0.779251	5.92065	0.642857	0.583333
Surgery cohort OS<=12m vs. OS>12m	CCL23	0.556548	0.356998	0.756098	10.1783	0.642857	0.583333
Surgery cohort OS<=12m vs. OS>12m	PGF	0.505952	0.315329	0.696575	6.98917	0.321429	0.833333
Surgery cohort OS<=12m vs. OS>12m	CSF-1	0.47619	0.267453	0.684928	9.11649	1	0.166667
Surgery cohort OS<=3m vs. OS>24m	CCL23	0.842105	0.661605	1	10.3873	0.736842	1
Surgery cohort OS<=3m vs. OS>24m	HGF	0.807018	0.59912	1	9.65905	0.684211	1
Surgery cohort OS<=3m vs. OS>24m	TNFRSF12A	0.789474	0.538359	1	5.55235	0.578947	1
Surgery cohort OS<=3m vs. OS>24m	PD-L2	0.77193	0.51925	1	2.00929	0.578947	1
Surgery cohort OS<=3m vs. OS>24m	IL-6	0.719298	0.471872	0.966724	2.75486	0.578947	1
Surgery cohort OS<=3m vs. OS>24m	PGF	0.684211	0.433096	0.935325	7.16656	0.526316	1
Surgery cohort OS<=3m vs. OS>24m	IL-15	0.666667	0.449497	0.883836	4.88316	0.631579	1
Surgery cohort OS<=3m vs. OS>24m	CSF-1	0.614035	0.387393	0.840677	9.46414	0.526316	1
Surgery cohort OS<=3m vs. OS>24m	PD-L1	0.614035	0.389724	0.838346	5.92558	0.578947	1
Surgery cohort OS<=3m vs. OS>24m	MUC-16	0.596491	0.052087	1	1.08621	0.842105	0.666667
Surgery cohort OS<=3m vs. OS>24m	CA199	0.54386	0.250071	0.837648	25	0.315789	1

## Sheet: Table S6
Table S6: Protein signatures. List of signatures for three sets of signatures. Set 1 comparing patients with overall survival (OS) ≤ 12 months vs. OS > 12 months, set 2 comparing OS ≤ 6 months vs. OS > 18 months, and set 3 comparing OS ≤ 3 months vs. OS > 24 months. Abbreviations: Min, minimum; N, number of proteins; OS, overall survival; Sig., signature.
Signature	Comparison	N proteins	Min. proportion score	Proteins included
Set 1, Sig. 1	OS ≤ 12 months vs. OS > 12 months	90	0	All
Set 1, Sig. 2	OS ≤ 12 months vs. OS > 12 months	54	0.05	MCP-3, ANGPT1, IL-6, ADGRG1, CXCL11, MCP-4, TRAIL-, FGF2, CD8A, CAIX, MUC-16, CD4, NOS3, Gal-9, VEGFR-2, IL-18, KIR3DL1, LAP-TGF-beta-1, TNFSF14, IL-33, FASLG, CD28, IL-15, PD-L1, CD27, CXCL5, IL-5, HGF, HO-1, CXCL10, CD70, IL-10, TNFRSF12A, CCL23, ARG1, NCR1, TNFRSF21, MIC-A-B, ANGPT2, PTN, CXCL12, IFN-gamma, LAMP3, CASP-8, ICOSLG, MMP12, PD-L2, VEGFA, IL-4, LAG3, CCL20, TNF, KLRD1, CA199
Set 1, Sig. 3	OS ≤ 12 months vs. OS > 12 months	32	0.1	IL-6, MCP-4, FGF2, CD8A, CAIX, MUC-16, CD4, Gal-9, VEGFR-2, IL-18, LAP-TGF-beta-1, TNFSF14, FASLG, CD28, IL-15, IL-5, HGF, CXCL10, CD70, IL-10, TNFRSF12A, CCL23, TNFRSF21, ANGPT2, PTN, CXCL12, IFN-gamma, PD-L2, VEGFA, TNF, KLRD1, CA199
Set 1, Sig. 4	OS ≤ 12 months vs. OS > 12 months	16	0.15	IL-6, MCP-4, MUC-16, Gal-9, IL-18, IL-15, IL-5, HGF, IL-10, CCL23, ANGPT2, PTN, VEGFA, TNF, KLRD1, CA199
Set 1, Sig. 5	OS ≤ 12 months vs. OS > 12 months	10	0.2	IL-6, MUC-16, IL-18, IL-15, IL-5, IL-10, CCL23, ANGPT2, PTN, CA199
Set 1, Sig. 7	OS ≤ 12 months vs. OS > 12 months	6	0.3	IL-6, MUC-16, IL-5, IL-10, PTN, CA199
Set 1, Sig. 8	OS ≤ 12 months vs. OS > 12 months	5	0.35	IL-6, MUC-16, IL-10, PTN, CA199
Set 1, Sig. 9	OS ≤ 12 months vs. OS > 12 months	4	0.4	IL-6, MUC-16, IL-10, PTN
Set 1, Sig. 10	OS ≤ 12 months vs. OS > 12 months	3	0.45	IL-6, IL-10, PTN
Set 1, Sig. 13	OS ≤ 12 months vs. OS > 12 months	2	0.6	IL-10, PTN
Set 1, Sig. 14	OS ≤ 12 months vs. OS > 12 months	1	0.65	PTN
Set 2, Sig. 1	OS ≤ 6 months vs. OS > 18 months	90	0	All
Set 2, Sig. 2	OS ≤ 6 months vs. OS > 18 months	39	0.05	IL-8, CD40-L, CD244, PGF, IL-6, CXCL11, MCP-4, TRAIL-, FGF2, CXCL9, MUC-16, CD4, VEGFR-2, KIR3DL1, CXCL1, IL-33, TWEAK, FASLG, IL-15, IL-5, CX3CL1, CD70, IL-10, TNFRSF12A, CCL23, CCL3, MMP7, TNFRSF21, MIC-A-B, ANGPT2, PTN, IFN-gamma, MMP12, CXCL13, IL-4, LAG3, CCL20, CSF-1, CA199
Set 2, Sig. 3	OS ≤ 6 months vs. OS > 18 months	23	0.1	IL-8, IL-6, TRAIL-, MUC-16, CD4, VEGFR-2, FASLG, IL-15, IL-5, CX3CL1, CD70, IL-10, TNFRSF12A, CCL23, MMP7, TNFRSF21, MIC-A-B, ANGPT2, PTN, MMP12, LAG3, CSF-1, CA199
Set 2, Sig. 4	OS ≤ 6 months vs. OS > 18 months	19	0.15	IL-8, IL-6, MUC-16, VEGFR-2, FASLG, IL-15, CD70, IL-10, TNFRSF12A, CCL23, MMP7, TNFRSF21, MIC-A-B, ANGPT2, PTN, MMP12, LAG3, CSF-1, CA199
Set 2, Sig. 5	OS ≤ 6 months vs. OS > 18 months	11	0.2	IL-6, MUC-16, VEGFR-2, IL-15, IL-10, CCL23, TNFRSF21, MIC-A-B, ANGPT2, PTN, MMP12
Set 2, Sig. 6	OS ≤ 6 months vs. OS > 18 months	9	0.25	IL-6, MUC-16, VEGFR-2, IL-15, IL-10, CCL23, TNFRSF21, MIC-A-B, PTN
Set 2, Sig. 7	OS ≤ 6 months vs. OS > 18 months	6	0.3	IL-6, MUC-16, IL-15, CCL23, MIC-A-B, PTN
Set 2, Sig. 9	OS ≤ 6 months vs. OS > 18 months	4	0.4	MUC-16, IL-15, CCL23, PTN
Set 2, Sig. 12	OS ≤ 6 months vs. OS > 18 months	3	0.55	MUC-16, IL-15, PTN
Set 2, Sig. 18	OS ≤ 6 months vs. OS > 18 months	2	0.85	MUC-16, IL-15
Set 2, Sig. 19	OS ≤ 6 months vs. OS > 18 months	1	0.9	MUC-16
Set 3, Sig. 1	OS ≤ 3 months vs. OS > 24 months	90	0	All
Set 3, Sig. 2	OS ≤ 3 months vs. OS > 24 months	19	0.05	CD40-L, EGF, IL-6, CRTAM, FGF2, MUC-16, CD4, CD40, TNFSF14, IL-15, CD27, IL-5, HGF, CD70, IL-10, CCL23, PTN, KLRD1, CA199
Set 3, Sig. 3	OS ≤ 3 months vs. OS > 24 months	12	0.1	EGF, IL-6, FGF2, MUC-16, IL-15, CD27, IL-5, HGF, CCL23, PTN, KLRD1, CA199
Set 3, Sig. 4	OS ≤ 3 months vs. OS > 24 months	7	0.15	IL-6, MUC-16, IL-15, IL-5, CCL23, PTN, CA199
Set 3, Sig. 5	OS ≤ 3 months vs. OS > 24 months	3	0.2	IL-6, MUC-16, CCL23
Set 3, Sig. 13	OS ≤ 3 months vs. OS > 24 months	2	0.6	IL-6, MUC-16

## Sheet: Table S7
Table S7: Signature performance in all cohorts. All values are presented with bootstrapped 95% confidence intervals in parentheses in the tables, except thresholds. Abbreviations: AUC, area under receiver operating characteristics curve; BPse, best point sensitivity; BPsp, best point specificity; BPt, threshold for the best point; Disc, first-line discovery cohort; L1 val., first-line validation …
Dataset	Comparison	Signature	N proteins	AUC	BPse	BPsp	PPV	NPV	BPt
Disc. Detection	Set 1: OS ≤ 12 months vs. OS > 12 months	1	90	0.80 (0.67-0.92)	0.80 (0.65-1.00)	0.75 (0.44-0.93)	0.69 (0.54-0.88)	0.84 (0.77-1.00)	0.40
Disc. Detection	Set 1: OS ≤ 12 months vs. OS > 12 months	2	54	0.83 (0.71-0.94)	0.85 (0.70-1.00)	0.75 (0.51-0.96)	0.70 (0.58-0.92)	0.88 (0.79-1.00)	0.40
Disc. Detection	Set 1: OS ≤ 12 months vs. OS > 12 months	3	32	0.87 (0.76-0.97)	0.95 (0.70-1.00)	0.72 (0.62-0.96)	0.70 (0.63-0.94)	0.95 (0.81-1.00)	0.48
Disc. Detection	Set 1: OS ≤ 12 months vs. OS > 12 months	4	16	0.86 (0.75-0.97)	0.95 (0.80-1.00)	0.79 (0.65-0.96)	0.76 (0.66-0.94)	0.95 (0.86-1.00)	0.45
Disc. Detection	Set 1: OS ≤ 12 months vs. OS > 12 months	5	10	0.85 (0.73-0.97)	0.95 (0.85-1.00)	0.82 (0.68-0.96)	0.79 (0.67-0.95)	0.96 (0.87-1.00)	0.45
Disc. Detection	Set 1: OS ≤ 12 months vs. OS > 12 months	7	6	0.85 (0.72-0.97)	0.90 (0.80-1.00)	0.86 (0.68-0.96)	0.81 (0.68-0.95)	0.92 (0.86-1.00)	0.51
Disc. Detection	Set 1: OS ≤ 12 months vs. OS > 12 months	8	5	0.84 (0.71-0.97)	0.95 (0.80-1.00)	0.79 (0.68-0.96)	0.76 (0.66-0.94)	0.95 (0.85-1.00)	0.41
Disc. Detection	Set 1: OS ≤ 12 months vs. OS > 12 months	9	4	0.84 (0.71-0.97)	0.90 (0.80-1.00)	0.82 (0.68-0.96)	0.78 (0.66-0.95)	0.92 (0.85-1.00)	0.48
Disc. Detection	Set 1: OS ≤ 12 months vs. OS > 12 months	10	3	0.84 (0.71-0.97)	0.95 (0.80-1.00)	0.79 (0.65-0.93)	0.76 (0.64-0.90)	0.95 (0.86-1.00)	0.31
Disc. Detection	Set 1: OS ≤ 12 months vs. OS > 12 months	13	2	0.80 (0.67-0.93)	0.90 (0.60-1.00)	0.68 (0.55-0.96)	0.66 (0.57-0.91)	0.90 (0.76-1.00)	0.23
Disc. Detection	Set 1: OS ≤ 12 months vs. OS > 12 months	14	1	0.67 (0.51-0.84)	0.55 (0.35-0.95)	0.93 (0.44-1.00)	0.84 (0.52-1.00)	0.75 (0.67-0.92)	0.45
Disc. Detection	Set 2: OS ≤ 6 months vs. OS > 18 months	1	90	0.91 (0.81-1.00)	0.83 (0.75-1.00)	0.88 (0.58-1.00)	0.83 (0.63-1.00)	0.88 (0.83-1.00)	0.41
Disc. Detection	Set 2: OS ≤ 6 months vs. OS > 18 months	2	39	0.96 (0.91-1.00)	1.00 (0.83-1.00)	0.88 (0.76-1.00)	0.85 (0.75-1.00)	1.00 (0.89-1.00)	0.40
Disc. Detection	Set 2: OS ≤ 6 months vs. OS > 18 months	3	23	0.99 (0.98-1.00)	1.00 (0.91-1.00)	0.94 (0.88-1.00)	0.92 (0.85-1.00)	1.00 (0.94-1.00)	0.63
Disc. Detection	Set 2: OS ≤ 6 months vs. OS > 18 months	4	19	1.00 (1.00-1.00)	1.00 (1.00-1.00)	1.00 (1.00-1.00)	1.00 (1.00-1.00)	1.00 (1.00-1.00)	0.63
Disc. Detection	Set 2: OS ≤ 6 months vs. OS > 18 months	5	11	1.00 (1.00-1.00)	1.00 (1.00-1.00)	1.00 (1.00-1.00)	1.00 (1.00-1.00)	1.00 (1.00-1.00)	0.66
Disc. Detection	Set 2: OS ≤ 6 months vs. OS > 18 months	6	9	1.00 (1.00-1.00)	1.00 (1.00-1.00)	1.00 (1.00-1.00)	1.00 (1.00-1.00)	1.00 (1.00-1.00)	0.69
Disc. Detection	Set 2: OS ≤ 6 months vs. OS > 18 months	7	6	0.99 (0.98-1.00)	1.00 (0.91-1.00)	0.94 (0.88-1.00)	0.92 (0.85-1.00)	1.00 (0.94-1.00)	0.49
Disc. Detection	Set 2: OS ≤ 6 months vs. OS > 18 months	9	4	0.99 (0.98-1.00)	1.00 (0.91-1.00)	0.94 (0.88-1.00)	0.92 (0.85-1.00)	1.00 (0.94-1.00)	0.47
Disc. Detection	Set 2: OS ≤ 6 months vs. OS > 18 months	12	3	1.00 (1.00-1.00)	1.00 (1.00-1.00)	1.00 (1.00-1.00)	1.00 (1.00-1.00)	1.00 (1.00-1.00)	0.50
Disc. Detection	Set 2: OS ≤ 6 months vs. OS > 18 months	18	2	0.99 (0.98-1.00)	1.00 (0.91-1.00)	0.94 (0.88-1.00)	0.92 (0.85-1.00)	1.00 (0.94-1.00)	0.45
Disc. Detection	Set 2: OS ≤ 6 months vs. OS > 18 months	19	1	0.89 (0.78-1.00)	0.91 (0.75-1.00)	0.82 (0.58-1.00)	0.78 (0.63-1.00)	0.93 (0.83-1.00)	0.43
Disc. Detection	Set 3: OS ≤ 3 months vs. OS > 24 months	1	90	0.78 (0.54-1.00)	0.85 (0.42-1.00)	0.62 (0.37-1.00)	0.66 (0.58-1.00)	0.83 (0.63-1.00)	0.51
Disc. Detection	Set 3: OS ≤ 3 months vs. OS > 24 months	2	19	0.94 (0.83-1.00)	1.00 (0.85-1.00)	0.87 (0.62-1.00)	0.87 (0.70-1.00)	1.00 (0.88-1.00)	0.52
Disc. Detection	Set 3: OS ≤ 3 months vs. OS > 24 months	3	12	1.00 (1.00-1.00)	1.00 (1.00-1.00)	1.00 (1.00-1.00)	1.00 (1.00-1.00)	1.00 (1.00-1.00)	0.83
Disc. Detection	Set 3: OS ≤ 3 months vs. OS > 24 months	4	7	1.00 (1.00-1.00)	1.00 (1.00-1.00)	1.00 (1.00-1.00)	1.00 (1.00-1.00)	1.00 (1.00-1.00)	0.72
Disc. Detection	Set 3: OS ≤ 3 months vs. OS > 24 months	5	3	1.00 (1.00-1.00)	1.00 (1.00-1.00)	1.00 (1.00-1.00)	1.00 (1.00-1.00)	1.00 (1.00-1.00)	0.76
Disc. Detection	Set 3: OS ≤ 3 months vs. OS > 24 months	13	2	0.96 (0.88-1.00)	1.00 (0.85-1.00)	0.87 (0.75-1.00)	0.87 (0.77-1.00)	1.00 (0.88-1.00)	0.79
Disc. Replication	Set 1: OS ≤ 12 months vs. OS > 12 months	1	90	0.73 (0.63-0.83)	0.69 (0.55-0.90)	0.75 (0.55-0.87)	0.68 (0.57-0.80)	0.76 (0.69-0.90)	0.42
Disc. Replication	Set 1: OS ≤ 12 months vs. OS > 12 months	2	54	0.72 (0.61-0.82)	0.81 (0.58-0.93)	0.60 (0.46-0.85)	0.61 (0.54-0.76)	0.80 (0.69-0.92)	0.30
Disc. Replication	Set 1: OS ≤ 12 months vs. OS > 12 months	3	32	0.71 (0.61-0.81)	0.72 (0.58-0.90)	0.69 (0.50-0.85)	0.64 (0.55-0.78)	0.76 (0.69-0.88)	0.36
Disc. Replication	Set 1: OS ≤ 12 months vs. OS > 12 months	4	16	0.74 (0.63-0.84)	0.65 (0.51-0.88)	0.80 (0.53-0.92)	0.71 (0.58-0.85)	0.75 (0.68-0.87)	0.51
Disc. Replication	Set 1: OS ≤ 12 months vs. OS > 12 months	5	10	0.72 (0.62-0.82)	0.65 (0.48-0.88)	0.76 (0.49-0.91)	0.68 (0.56-0.83)	0.74 (0.67-0.87)	0.44
Disc. Replication	Set 1: OS ≤ 12 months vs. OS > 12 months	7	6	0.73 (0.63-0.83)	0.65 (0.46-0.93)	0.75 (0.46-0.92)	0.66 (0.55-0.84)	0.73 (0.67-0.89)	0.45
Disc. Replication	Set 1: OS ≤ 12 months vs. OS > 12 months	8	5	0.75 (0.65-0.84)	0.62 (0.51-0.95)	0.80 (0.44-0.91)	0.71 (0.55-0.84)	0.73 (0.68-0.93)	0.46
Disc. Replication	Set 1: OS ≤ 12 months vs. OS > 12 months	9	4	0.74 (0.64-0.84)	0.69 (0.53-0.90)	0.75 (0.55-0.89)	0.68 (0.57-0.82)	0.76 (0.69-0.88)	0.43
Disc. Replication	Set 1: OS ≤ 12 months vs. OS > 12 months	10	3	0.71 (0.60-0.81)	0.74 (0.48-0.90)	0.66 (0.48-0.89)	0.62 (0.54-0.81)	0.77 (0.67-0.89)	0.36
Disc. Replication	Set 1: OS ≤ 12 months vs. OS > 12 months	13	2	0.63 (0.52-0.75)	0.76 (0.25-0.88)	0.50 (0.41-0.96)	0.54 (0.50-0.88)	0.73 (0.61-0.85)	0.32
Disc. Replication	Set 1: OS ≤ 12 months vs. OS > 12 months	14	1	0.58 (0.46-0.69)	0.32 (0.25-1.00)	0.83 (0.16-0.94)	0.60 (0.46-0.81)	0.61 (0.60-1.00)	0.52
Disc. Replication	Set 2: OS ≤ 6 months vs. OS > 18 months	1	90	0.86 (0.77-0.96)	0.77 (0.59-0.92)	0.90 (0.76-1.00)	0.87 (0.75-1.00)	0.81 (0.72-0.93)	0.43
Disc. Replication	Set 2: OS ≤ 6 months vs. OS > 18 months	2	39	0.88 (0.80-0.96)	0.85 (0.55-1.00)	0.80 (0.66-1.00)	0.79 (0.70-1.00)	0.85 (0.71-1.00)	0.29
Disc. Replication	Set 2: OS ≤ 6 months vs. OS > 18 months	3	23	0.89 (0.81-0.97)	0.85 (0.66-1.00)	0.86 (0.66-1.00)	0.85 (0.71-1.00)	0.86 (0.76-1.00)	0.28
Disc. Replication	Set 2: OS ≤ 6 months vs. OS > 18 months	4	19	0.89 (0.80-0.97)	0.88 (0.70-1.00)	0.83 (0.70-0.96)	0.82 (0.73-0.96)	0.89 (0.77-1.00)	0.26
Disc. Replication	Set 2: OS ≤ 6 months vs. OS > 18 months	5	11	0.90 (0.82-0.98)	0.85 (0.70-1.00)	0.86 (0.73-1.00)	0.85 (0.74-1.00)	0.86 (0.77-1.00)	0.25
Disc. Replication	Set 2: OS ≤ 6 months vs. OS > 18 months	6	9	0.91 (0.83-0.99)	0.92 (0.70-1.00)	0.80 (0.73-1.00)	0.80 (0.75-1.00)	0.92 (0.78-1.00)	0.14
Disc. Replication	Set 2: OS ≤ 6 months vs. OS > 18 months	7	6	0.91 (0.83-0.98)	0.85 (0.66-0.96)	0.90 (0.83-1.00)	0.88 (0.81-1.00)	0.87 (0.76-0.96)	0.41
Disc. Replication	Set 2: OS ≤ 6 months vs. OS > 18 months	9	4	0.90 (0.83-0.98)	0.85 (0.70-0.96)	0.90 (0.83-1.00)	0.88 (0.80-1.00)	0.87 (0.76-0.96)	0.43
Disc. Replication	Set 2: OS ≤ 6 months vs. OS > 18 months	12	3	0.89 (0.80-0.98)	0.74 (0.62-1.00)	0.96 (0.73-1.00)	0.95 (0.74-1.00)	0.80 (0.75-1.00)	0.54
Disc. Replication	Set 2: OS ≤ 6 months vs. OS > 18 months	18	2	0.89 (0.80-0.98)	0.85 (0.66-0.96)	0.86 (0.76-1.00)	0.85 (0.77-1.00)	0.86 (0.75-0.96)	0.31
Disc. Replication	Set 2: OS ≤ 6 months vs. OS > 18 months	19	1	0.84 (0.73-0.94)	0.59 (0.48-0.96)	0.96 (0.66-1.00)	0.94 (0.68-1.00)	0.72 (0.67-0.95)	0.62
Disc. Replication	Set 3: OS ≤ 3 months vs. OS > 24 months	1	90	0.92 (0.83-1.00)	0.73 (0.63-1.00)	1.00 (0.72-1.00)	1.00 (0.84-1.00)	0.68 (0.61-1.00)	0.54
Disc. Replication	Set 3: OS ≤ 3 months vs. OS > 24 months	2	19	0.92 (0.84-1.00)	0.78 (0.63-1.00)	0.90 (0.63-1.00)	0.93 (0.82-1.00)	0.71 (0.61-1.00)	0.38
Disc. Replication	Set 3: OS ≤ 3 months vs. OS > 24 months	3	12	0.93 (0.84-1.00)	0.89 (0.63-1.00)	0.81 (0.63-1.00)	0.89 (0.82-1.00)	0.81 (0.61-1.00)	0.16
Disc. Replication	Set 3: OS ≤ 3 months vs. OS > 24 months	4	7	0.96 (0.91-1.00)	1.00 (0.73-1.00)	0.81 (0.72-1.00)	0.90 (0.86-1.00)	1.00 (0.68-1.00)	0.05
Disc. Replication	Set 3: OS ≤ 3 months vs. OS > 24 months	5	3	0.92 (0.83-1.00)	0.84 (0.63-1.00)	0.90 (0.72-1.00)	0.94 (0.86-1.00)	0.76 (0.61-1.00)	0.22
Disc. Replication	Set 3: OS ≤ 3 months vs. OS > 24 months	13	2	0.92 (0.83-1.00)	0.78 (0.63-1.00)	1.00 (0.81-1.00)	1.00 (0.88-1.00)	0.73 (0.61-1.00)	0.58
L1 val cohort	Set 1: OS ≤ 12 months vs. OS > 12 months	1	90	0.64 (0.54-0.75)	0.50 (0.36-0.88)	0.76 (0.38-0.89)	0.56 (0.44-0.72)	0.71 (0.67-0.87)	0.24
L1 val cohort	Set 1: OS ≤ 12 months vs. OS > 12 months	2	54	0.65 (0.55-0.76)	0.52 (0.38-0.90)	0.78 (0.41-0.89)	0.58 (0.45-0.74)	0.73 (0.69-0.89)	0.11
L1 val cohort	Set 1: OS ≤ 12 months vs. OS > 12 months	3	32	0.67 (0.57-0.77)	0.56 (0.38-0.95)	0.78 (0.31-0.91)	0.60 (0.45-0.77)	0.75 (0.70-0.91)	0.05
L1 val cohort	Set 1: OS ≤ 12 months vs. OS > 12 months	4	16	0.65 (0.55-0.75)	0.47 (0.34-0.93)	0.79 (0.35-0.91)	0.58 (0.44-0.75)	0.71 (0.68-0.91)	0.01
L1 val cohort	Set 1: OS ≤ 12 months vs. OS > 12 months	5	10	0.66 (0.55-0.76)	0.68 (0.27-0.93)	0.58 (0.34-0.95)	0.49 (0.44-0.83)	0.75 (0.68-0.90)	0
L1 val cohort	Set 1: OS ≤ 12 months vs. OS > 12 months	7	6	0.65 (0.55-0.76)	0.56 (0.34-0.93)	0.69 (0.35-0.93)	0.53 (0.44-0.78)	0.72 (0.69-0.91)	0
L1 val cohort	Set 1: OS ≤ 12 months vs. OS > 12 months	8	5	0.66 (0.56-0.77)	0.61 (0.29-0.93)	0.68 (0.36-0.95)	0.54 (0.45-0.82)	0.74 (0.68-0.91)	0
L1 val cohort	Set 1: OS ≤ 12 months vs. OS > 12 months	9	4	0.66 (0.56-0.76)	0.88 (0.50-0.95)	0.43 (0.36-0.83)	0.48 (0.45-0.68)	0.86 (0.71-0.94)	0
L1 val cohort	Set 1: OS ≤ 12 months vs. OS > 12 months	10	3	0.64 (0.54-0.74)	0.54 (0.38-0.90)	0.73 (0.36-0.87)	0.55 (0.44-0.71)	0.72 (0.68-0.89)	0
L1 val cohort	Set 1: OS ≤ 12 months vs. OS > 12 months	13	2	0.59 (0.49-0.70)	0.63 (0.40-0.90)	0.61 (0.30-0.80)	0.50 (0.41-0.61)	0.73 (0.67-0.86)	0
L1 val cohort	Set 1: OS ≤ 12 months vs. OS > 12 months	14	1	0.55 (0.44-0.66)	0.56 (0.11-0.93)	0.56 (0.20-0.98)	0.43 (0.40-0.90)	0.68 (0.64-0.85)	0.10
L1 val cohort	Set 2: OS ≤ 6 months vs. OS > 18 months	1	90	0.79 (0.68-0.90)	0.82 (0.60-1.00)	0.66 (0.38-0.94)	0.61 (0.51-0.87)	0.85 (0.76-1.00)	0
L1 val cohort	Set 2: OS ≤ 6 months vs. OS > 18 months	2	39	0.82 (0.70-0.93)	0.73 (0.56-0.95)	0.86 (0.58-0.97)	0.77 (0.58-0.94)	0.83 (0.76-0.96)	0
L1 val cohort	Set 2: OS ≤ 6 months vs. OS > 18 months	3	23	0.82 (0.71-0.93)	0.82 (0.65-1.00)	0.77 (0.55-0.94)	0.70 (0.57-0.90)	0.87 (0.78-1.00)	0
L1 val cohort	Set 2: OS ≤ 6 months vs. OS > 18 months	4	19	0.82 (0.71-0.93)	0.73 (0.60-1.00)	0.83 (0.55-0.97)	0.73 (0.56-0.94)	0.83 (0.77-1.00)	0
L1 val cohort	Set 2: OS ≤ 6 months vs. OS > 18 months	5	11	0.83 (0.72-0.93)	0.91 (0.65-1.00)	0.66 (0.52-0.94)	0.63 (0.56-0.88)	0.92 (0.79-1.00)	0
L1 val cohort	Set 2: OS ≤ 6 months vs. OS > 18 months	6	9	0.82 (0.71-0.93)	0.91 (0.65-1.00)	0.66 (0.55-0.91)	0.63 (0.56-0.86)	0.92 (0.79-1.00)	0
L1 val cohort	Set 2: OS ≤ 6 months vs. OS > 18 months	7	6	0.82 (0.72-0.93)	0.91 (0.60-1.00)	0.63 (0.52-0.94)	0.61 (0.56-0.90)	0.92 (0.77-1.00)	0
L1 val cohort	Set 2: OS ≤ 6 months vs. OS > 18 months	9	4	0.84 (0.74-0.95)	0.82 (0.60-1.00)	0.77 (0.61-0.97)	0.70 (0.60-0.94)	0.87 (0.78-1.00)	0
L1 val cohort	Set 2: OS ≤ 6 months vs. OS > 18 months	12	3	0.85 (0.74-0.95)	0.82 (0.60-0.95)	0.83 (0.72-0.97)	0.76 (0.65-0.95)	0.88 (0.78-0.97)	0
L1 val cohort	Set 2: OS ≤ 6 months vs. OS > 18 months	18	2	0.83 (0.72-0.94)	0.78 (0.60-0.95)	0.86 (0.75-0.97)	0.78 (0.65-0.95)	0.86 (0.77-0.96)	0
L1 val cohort	Set 2: OS ≤ 6 months vs. OS > 18 months	19	1	0.77 (0.63-0.91)	0.73 (0.52-0.91)	0.80 (0.63-0.97)	0.70 (0.58-0.93)	0.82 (0.73-0.93)	0
L1 val cohort	Set 3: OS ≤ 3 months vs. OS > 24 months	1	90	0.74 (0.55-0.93)	0.83 (0.58-1.00)	0.70 (0.47-0.94)	0.66 (0.52-0.90)	0.85 (0.72-1.00)	0
L1 val cohort	Set 3: OS ≤ 3 months vs. OS > 24 months	2	19	0.75 (0.57-0.94)	0.75 (0.50-1.00)	0.76 (0.35-1.00)	0.69 (0.52-1.00)	0.81 (0.69-1.00)	0
L1 val cohort	Set 3: OS ≤ 3 months vs. OS > 24 months	3	12	0.74 (0.55-0.93)	0.75 (0.41-1.00)	0.76 (0.35-1.00)	0.69 (0.52-1.00)	0.81 (0.68-1.00)	0
L1 val cohort	Set 3: OS ≤ 3 months vs. OS > 24 months	4	7	0.76 (0.57-0.95)	0.75 (0.33-1.00)	0.76 (0.52-1.00)	0.69 (0.55-1.00)	0.81 (0.68-1.00)	0
L1 val cohort	Set 3: OS ≤ 3 months vs. OS > 24 months	5	3	0.81 (0.65-0.97)	0.91 (0.50-1.00)	0.70 (0.47-1.00)	0.68 (0.56-1.00)	0.92 (0.73-1.00)	0
L1 val cohort	Set 3: OS ≤ 3 months vs. OS > 24 months	13	2	0.82 (0.67-0.98)	0.91 (0.50-1.00)	0.70 (0.52-1.00)	0.68 (0.57-1.00)	0.92 (0.73-1.00)	0
L2 cohort	Set 1: OS ≤ 12 months vs. OS > 12 months	1	90	0.73 (0.58-0.87)	0.92 (0.50-1.00)	0.47 (0.32-0.97)	0.38 (0.34-0.87)	0.95 (0.83-1.00)	0.68
L2 cohort	Set 1: OS ≤ 12 months vs. OS > 12 months	2	54	0.71 (0.56-0.86)	0.92 (0.42-1.00)	0.45 (0.27-0.97)	0.37 (0.32-0.87)	0.94 (0.81-1.00)	0.43
L2 cohort	Set 1: OS ≤ 12 months vs. OS > 12 months	3	32	0.68 (0.51-0.84)	0.42 (0.28-1.00)	0.87 (0.25-1.00)	0.54 (0.31-1.00)	0.81 (0.80-1.00)	0.64
L2 cohort	Set 1: OS ≤ 12 months vs. OS > 12 months	4	16	0.67 (0.50-0.84)	0.50 (0.35-1.00)	0.90 (0.25-0.97)	0.63 (0.31-0.90)	0.83 (0.80-1.00)	0.17
L2 cohort	Set 1: OS ≤ 12 months vs. OS > 12 months	5	10	0.70 (0.54-0.86)	0.50 (0.42-1.00)	0.87 (0.25-0.97)	0.58 (0.31-0.88)	0.83 (0.80-1.00)	0
L2 cohort	Set 1: OS ≤ 12 months vs. OS > 12 months	7	6	0.70 (0.54-0.86)	0.50 (0.35-1.00)	0.87 (0.27-0.97)	0.58 (0.31-0.90)	0.83 (0.80-1.00)	0
L2 cohort	Set 1: OS ≤ 12 months vs. OS > 12 months	8	5	0.69 (0.53-0.86)	0.50 (0.35-1.00)	0.87 (0.25-0.97)	0.58 (0.31-0.90)	0.83 (0.80-1.00)	0
L2 cohort	Set 1: OS ≤ 12 months vs. OS > 12 months	9	4	0.76 (0.62-0.89)	0.78 (0.57-1.00)	0.67 (0.37-0.92)	0.45 (0.35-0.78)	0.90 (0.85-1.00)	0
L2 cohort	Set 1: OS ≤ 12 months vs. OS > 12 months	10	3	0.74 (0.58-0.90)	0.64 (0.42-1.00)	0.85 (0.52-0.95)	0.60 (0.37-0.85)	0.87 (0.81-1.00)	0
L2 cohort	Set 1: OS ≤ 12 months vs. OS > 12 months	13	2	0.64 (0.48-0.80)	0.92 (0.42-1.00)	0.37 (0.22-0.92)	0.34 (0.30-0.66)	0.93 (0.80-1.00)	0
L2 cohort	Set 1: OS ≤ 12 months vs. OS > 12 months	14	1	0.46 (0.29-0.64)	0.85 (0.21-1.00)	0.22 (0.02-0.90)	0.27 (0.26-0.46)	0.81 (0.75-1.00)	0.20
L2 cohort	Set 2: OS ≤ 6 months vs. OS > 18 months	1	90	0.85 (0.71-0.98)	0.83 (0.83-1.00)	0.81 (0.53-0.93)	0.45 (0.28-0.75)	0.96 (0.95-1.00)	0
L2 cohort	Set 2: OS ≤ 6 months vs. OS > 18 months	2	39	0.88 (0.77-0.99)	1.00 (0.83-1.00)	0.75 (0.62-0.96)	0.42 (0.33-0.83)	1.00 (0.96-1.00)	0
L2 cohort	Set 2: OS ≤ 6 months vs. OS > 18 months	3	23	0.89 (0.78-0.99)	1.00 (1.00-1.00)	0.81 (0.68-0.93)	0.50 (0.37-0.75)	1.00 (1.00-1.00)	0
L2 cohort	Set 2: OS ≤ 6 months vs. OS > 18 months	4	19	0.90 (0.80-0.99)	1.00 (1.00-1.00)	0.84 (0.71-0.96)	0.54 (0.40-0.85)	1.00 (1.00-1.00)	0
L2 cohort	Set 2: OS ≤ 6 months vs. OS > 18 months	5	11	0.86 (0.74-0.98)	1.00 (0.83-1.00)	0.71 (0.59-0.93)	0.40 (0.31-0.75)	1.00 (0.96-1.00)	0
L2 cohort	Set 2: OS ≤ 6 months vs. OS > 18 months	6	9	0.86 (0.75-0.98)	1.00 (0.83-1.00)	0.71 (0.59-0.93)	0.40 (0.31-0.75)	1.00 (0.96-1.00)	0
L2 cohort	Set 2: OS ≤ 6 months vs. OS > 18 months	7	6	0.87 (0.75-0.99)	1.00 (0.83-1.00)	0.71 (0.59-0.96)	0.40 (0.31-0.83)	1.00 (0.96-1.00)	0
L2 cohort	Set 2: OS ≤ 6 months vs. OS > 18 months	9	4	0.86 (0.71-1.00)	0.83 (0.66-1.00)	0.87 (0.50-0.96)	0.55 (0.27-0.85)	0.96 (0.93-1.00)	0
L2 cohort	Set 2: OS ≤ 6 months vs. OS > 18 months	12	3	0.81 (0.61-1.00)	0.66 (0.50-1.00)	0.93 (0.37-1.00)	0.66 (0.23-1.00)	0.93 (0.90-1.00)	0
L2 cohort	Set 2: OS ≤ 6 months vs. OS > 18 months	18	2	0.80 (0.60-1.00)	0.66 (0.50-1.00)	0.87 (0.37-1.00)	0.50 (0.23-1.00)	0.93 (0.90-1.00)	0
L2 cohort	Set 2: OS ≤ 6 months vs. OS > 18 months	19	1	0.76 (0.53-1.00)	0.66 (0.50-1.00)	0.90 (0.34-1.00)	0.57 (0.22-1.00)	0.93 (0.89-1.00)	0.03
L2 cohort	Set 3: OS ≤ 3 months vs. OS > 24 months	1	90	0.75 (0.45-1.00)	0.75 (0.50-1.00)	0.84 (0.30-1.00)	0.60 (0.30-1.00)	0.91 (0.84-1.00)	0
L2 cohort	Set 3: OS ≤ 3 months vs. OS > 24 months	2	19	0.80 (0.53-1.00)	0.75 (0.50-1.00)	0.76 (0.38-1.00)	0.50 (0.33-1.00)	0.90 (0.86-1.00)	0
L2 cohort	Set 3: OS ≤ 3 months vs. OS > 24 months	3	12	0.82 (0.55-1.00)	0.75 (0.50-1.00)	0.84 (0.38-1.00)	0.60 (0.33-1.00)	0.91 (0.86-1.00)	0
L2 cohort	Set 3: OS ≤ 3 months vs. OS > 24 months	4	7	0.84 (0.62-1.00)	1.00 (0.74-1.00)	0.69 (0.53-1.00)	0.50 (0.40-1.00)	1.00 (0.92-1.00)	0
L2 cohort	Set 3: OS ≤ 3 months vs. OS > 24 months	5	3	0.92 (0.78-1.00)	1.00 (0.75-1.00)	0.84 (0.61-1.00)	0.66 (0.44-1.00)	1.00 (0.92-1.00)	0
L2 cohort	Set 3: OS ≤ 3 months vs. OS > 24 months	13	2	0.96 (0.87-1.00)	1.00 (0.75-1.00)	0.84 (0.69-1.00)	0.66 (0.50-1.00)	1.00 (0.92-1.00)	0
Surgery cohort	Set 1: OS ≤ 12 months vs. OS > 12 months	1	90	0.70 (0.54-0.86)	0.64 (0.28-0.92)	0.75 (0.50-1.00)	0.85 (0.80-1.00)	0.47 (0.37-0.77)	0.86
Surgery cohort	Set 1: OS ≤ 12 months vs. OS > 12 months	2	54	0.72 (0.57-0.88)	0.46 (0.32-0.92)	1.00 (0.58-1.00)	1.00 (0.81-1.00)	0.44 (0.38-0.83)	0.89
Surgery cohort	Set 1: OS ≤ 12 months vs. OS > 12 months	3	32	0.67 (0.50-0.84)	0.46 (0.28-0.89)	0.91 (0.50-1.00)	0.92 (0.78-1.00)	0.42 (0.36-0.72)	0.65
Surgery cohort	Set 1: OS ≤ 12 months vs. OS > 12 months	4	16	0.63 (0.44-0.82)	0.75 (0.32-0.89)	0.58 (0.41-1.00)	0.80 (0.75-1.00)	0.50 (0.34-0.72)	0.05
Surgery cohort	Set 1: OS ≤ 12 months vs. OS > 12 months	5	10	0.66 (0.49-0.84)	0.71 (0.32-0.89)	0.66 (0.50-1.00)	0.83 (0.78-1.00)	0.50 (0.36-0.72)	0
Surgery cohort	Set 1: OS ≤ 12 months vs. OS > 12 months	7	6	0.65 (0.48-0.83)	0.75 (0.25-0.89)	0.58 (0.50-1.00)	0.80 (0.77-1.00)	0.50 (0.35-0.71)	0
Surgery cohort	Set 1: OS ≤ 12 months vs. OS > 12 months	8	5	0.68 (0.51-0.85)	0.64 (0.28-0.89)	0.75 (0.50-1.00)	0.85 (0.78-1.00)	0.47 (0.36-0.73)	0
Surgery cohort	Set 1: OS ≤ 12 months vs. OS > 12 months	9	4	0.65 (0.46-0.83)	0.71 (0.21-0.89)	0.66 (0.50-1.00)	0.83 (0.76-1.00)	0.50 (0.35-0.71)	0
Surgery cohort	Set 1: OS ≤ 12 months vs. OS > 12 months	10	3	0.70 (0.52-0.88)	0.67 (0.28-0.96)	0.75 (0.50-1.00)	0.86 (0.78-1.00)	0.50 (0.37-0.85)	0
Surgery cohort	Set 1: OS ≤ 12 months vs. OS > 12 months	13	2	0.70 (0.53-0.87)	0.57 (0.25-0.92)	0.83 (0.50-1.00)	0.88 (0.79-1.00)	0.45 (0.36-0.77)	0
Surgery cohort	Set 1: OS ≤ 12 months vs. OS > 12 months	14	1	0.61 (0.44-0.79)	0.57 (0.24-0.78)	0.83 (0.66-1.00)	0.88 (0.81-1.00)	0.45 (0.35-0.61)	0.12
Surgery cohort	Set 2: OS ≤ 6 months vs. OS > 18 months	1	90	0.85 (0.71-0.99)	0.75 (0.58-0.95)	1.00 (0.80-1.00)	1.00 (0.95-1.00)	0.45 (0.33-0.83)	0
Surgery cohort	Set 2: OS ≤ 6 months vs. OS > 18 months	2	39	0.81 (0.64-0.98)	0.79 (0.45-0.95)	0.80 (0.80-1.00)	0.95 (0.94-1.00)	0.44 (0.27-0.83)	0
Surgery cohort	Set 2: OS ≤ 6 months vs. OS > 18 months	3	23	0.85 (0.71-0.98)	0.75 (0.58-0.95)	1.00 (0.80-1.00)	1.00 (0.96-1.00)	0.45 (0.33-0.83)	0
Surgery cohort	Set 2: OS ≤ 6 months vs. OS > 18 months	4	19	0.83 (0.67-0.98)	0.66 (0.50-0.95)	1.00 (0.80-1.00)	1.00 (0.95-1.00)	0.38 (0.29-0.83)	0
Surgery cohort	Set 2: OS ≤ 6 months vs. OS > 18 months	5	11	0.85 (0.71-0.98)	0.79 (0.62-0.95)	1.00 (1.00-1.00)	1.00 (1.00-1.00)	0.50 (0.35-0.83)	0
Surgery cohort	Set 2: OS ≤ 6 months vs. OS > 18 months	6	9	0.85 (0.71-0.98)	0.79 (0.62-0.95)	1.00 (1.00-1.00)	1.00 (1.00-1.00)	0.50 (0.35-0.83)	0
Surgery cohort	Set 2: OS ≤ 6 months vs. OS > 18 months	7	6	0.85 (0.71-0.98)	0.79 (0.62-0.95)	1.00 (1.00-1.00)	1.00 (1.00-1.00)	0.50 (0.35-0.83)	0
Surgery cohort	Set 2: OS ≤ 6 months vs. OS > 18 months	9	4	0.79 (0.62-0.95)	0.66 (0.50-0.91)	1.00 (0.80-1.00)	1.00 (0.95-1.00)	0.38 (0.29-0.71)	0
Surgery cohort	Set 2: OS ≤ 6 months vs. OS > 18 months	12	3	0.76 (0.56-0.96)	0.54 (0.41-0.95)	1.00 (0.60-1.00)	1.00 (0.91-1.00)	0.31 (0.26-0.83)	0
Surgery cohort	Set 2: OS ≤ 6 months vs. OS > 18 months	18	2	0.62 (0.30-0.94)	0.87 (0.16-1.00)	0.60 (0.40-1.00)	0.91 (0.86-1.00)	0.50 (0.20-1.00)	0
Surgery cohort	Set 2: OS ≤ 6 months vs. OS > 18 months	19	1	0.50 (0.18-0.82)	0.66 (0.08-0.95)	0.60 (0.40-1.00)	0.88 (0.85-1.00)	0.27 (0.18-0.66)	0.02
Surgery cohort	Set 3: OS ≤ 3 months vs. OS > 24 months	1	90	0.71 (0.47-0.96)	0.57 (0.36-0.94)	1.00 (0.66-1.00)	1.00 (0.94-1.00)	0.27 (0.20-0.75)	0
Surgery cohort	Set 3: OS ≤ 3 months vs. OS > 24 months	2	19	0.73 (0.50-0.96)	0.57 (0.42-0.94)	1.00 (0.66-1.00)	1.00 (0.94-1.00)	0.27 (0.21-0.75)	0
Surgery cohort	Set 3: OS ≤ 3 months vs. OS > 24 months	3	12	0.70 (0.45-0.95)	0.52 (0.36-0.89)	1.00 (0.66-1.00)	1.00 (0.94-1.00)	0.25 (0.18-0.60)	0
Surgery cohort	Set 3: OS ≤ 3 months vs. OS > 24 months	4	7	0.73 (0.49-0.97)	0.57 (0.36-0.94)	1.00 (0.66-1.00)	1.00 (0.94-1.00)	0.27 (0.20-0.75)	0
Surgery cohort	Set 3: OS ≤ 3 months vs. OS > 24 months	5	3	0.70 (0.39-1.00)	0.47 (0.31-1.00)	1.00 (0.66-1.00)	1.00 (0.93-1.00)	0.23 (0.18-1.00)	0
Surgery cohort	Set 3: OS ≤ 3 months vs. OS > 24 months	13	2	0.59 (0.18-1.00)	0.94 (0.15-1.00)	0.33 (0.33-1.00)	0.90 (0.89-1.00)	0.50 (0.15-1.00)	0
